# Supplementary material for: Acid-catalyzed reaction of 2-hydroxycyclobutanone with benzylic alcohols
Source: Royal Society of Chemistry journal article supplement (doi:10.1039/c7ob02545a), 2017-01-01
Supplement: c7ob02545a1.pdf [file c7ob02545a1.pdf]

## Supporting Information

### Acid-Catalyzed Functionalization of $\alpha$ -Hydroxycyclobutanone with Benzylic Alcohols

Alberto Martis,<sup>a</sup> Alberto Luridiana,<sup>a</sup> Angelo Frongia,<sup>a</sup> Giorgia Sarais,<sup>b</sup> David J. Aitken,<sup>c</sup> Régis Guillot,<sup>c</sup> Massimiliano Arca,<sup>a</sup> Francesco Secci<sup>a\*</sup>

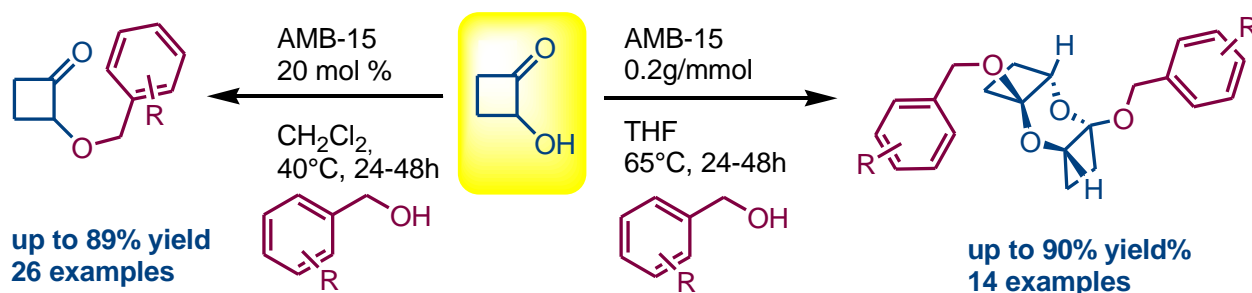

<sup>a</sup>Dipartimento di Scienze Chimiche e Geologiche, Università degli Studi di Cagliari, Complesso Universitario di Monserrato, Monserrato (Ca) ITALY  
Phone : (+39)-0706754384, Fax: (+39)-0706754456, e-mail: [fsecci@unica.it](mailto:fsecci@unica.it)

<sup>b</sup>Dipartimento di Scienze della Vita e dell'Ambiente, Università degli Studi di Cagliari, Palazzo delle Scienze, via Ospedale 82, 09124 Cagliari, ITALY

<sup>c</sup>CP3A Organic Synthesis Group, ICMMO (UMR CNRS8182), Université Paris-Sud, 15 rue Georges Clemenceau, 91405 Orsay, Cedex, FRANCE

## Table of Contents

|                                                                        |       |
|------------------------------------------------------------------------|-------|
| 1. Materials and methods                                               | 2     |
| 2. Amberlist-15 recycling and efficiency tests                         | 3     |
| 3. DFT calculations                                                    | 4     |
| 4. <sup>1</sup> H and <sup>13</sup> C NMR spectra of compounds 3 and 5 | 5-26  |
| 5. <sup>1</sup> H and <sup>13</sup> C NMR spectra of dioxins 4         | 27-38 |
| 6. JMOD, COSY, HMBC, HSQC, HRMS analysis of compound <i>cis</i> -4n    | 39-41 |
| 7. X-Ray analysis of compound <i>cis</i> -4n                           | 42    |

## 1. Materials and Methods

Unless stated otherwise, respectively the synthesis of compounds **3a-v** were performed at 40 °C and synthesis of compounds **5a-v** were performed at 65 °C.

Commercially available reagents were used as received unless otherwise noted. Alcohols **2a-d, 2g, h, j, o, p, u, v, y, z** were purchased from Aldrich. The acids used in this work were purchased from Sigma Aldrich or Alfa-Aesar and used as received. Alcohols **2f,i,l-n,q-t** were prepared from the corresponding aldehydes and ketones by reduction using NaBH<sub>4</sub> in THF/MeOH at 0°C.

<sup>1</sup>H NMR spectra were recorded on 400 and 500 MHz Varian spectrometers at 27°C using CDCl<sub>3</sub>, as solvent. <sup>13</sup>C NMR were recorded at 100 and 125 MHz at 27°C using CDCl<sub>3</sub>, as solvent. Chemical shifts ( $\delta$ ) are given in ppm. Coupling constants (*J*) are reported in Hz. Infrared spectra were recorded on a FT-IR Bruker Equinox-55 spectrophotometer and are reported in wavenumbers.

Low Mass spectra analysis were recorded on an Agilent-HP GC-MS (E.I. 70eV). High resolution mass spectra (HRMS) were obtained using a Bruker High Resolution Mass Spectrometer in fast atom bombardment (FAB+) ionization mode or acquired using an Bruker micrOTOF-Q II 10027.

Analytical thin layer chromatography was performed using 0.25 mm Aldrich silica gel 60-F plates. Flash chromatography was performed using Merk 70-200 mesh silica gel. Yields refer to chromatography and spectroscopically pure materials.

## 2. Amberlyst-15 recycling<sup>1</sup>

Amberlyst-15 was used as received and recovered from the crude reaction mixtures by simple filtration on DURAN sintered glass filters. The catalyst was washed twice with Et<sub>2</sub>O and dried at 50°C under reduced pressure for 4h in order to be reused for further reaction cycles.

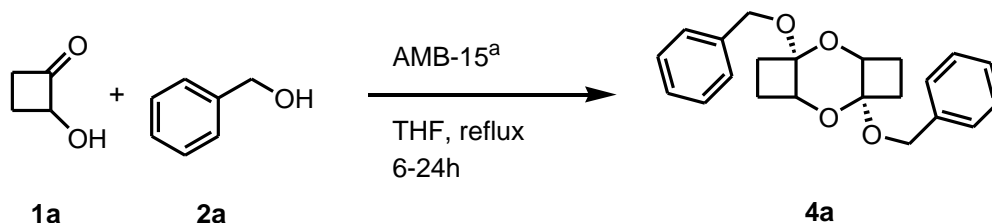

**Table S1. AMB-15 recycling and catalytic properties<sup>1,2</sup>**

| Entry | <b>1a</b> loading | Catalyst recovery %    | AMB-15 mg recovery | <b>4a</b> yield <sup>b</sup> | notes                          |
|-------|-------------------|------------------------|--------------------|------------------------------|--------------------------------|
| 1     | 50 mg             | >98 (spheres)          | 114mg              | 87                           |                                |
| 2     | 49 mg             | >98(spheres)           | 112mg              | 88                           |                                |
| 3     | 48 mg             | >98(spheres)           | 109 mg             | 85                           |                                |
| 4     | 47 mg             | 94(spheres)            | 103 mg             | 86                           |                                |
| 5     | 39 mg             | 87(spheres)            | 90 mg              | 73                           |                                |
| 6     | 33 mg             | 85 (dark-brown powder) | 76 mg              | 68                           |                                |
| 7     | 22 mg             | 65(dark-brown powder)  | 50 mg              | 60                           | Unidentified products detected |
| 8     | 13 mg             | 60(dark-brown powder)  | 29 mg              | 32                           | Unidentified products detected |

Synthesis of substituted 2,7-dioxatricyclodecane **4a** and catalyst recovery. [a] Reaction conditions: in a vial, cyclobutanone **1a** (0.58 mmol) BnOH **2a** (1.0 equiv.), AMB-15 (0.2g/mmol, 0.116 g) in THF (2 mL) were stirred at 65° C for 48h. [b] Yields of **4a** were determined by weighting after flash chromatography purification.

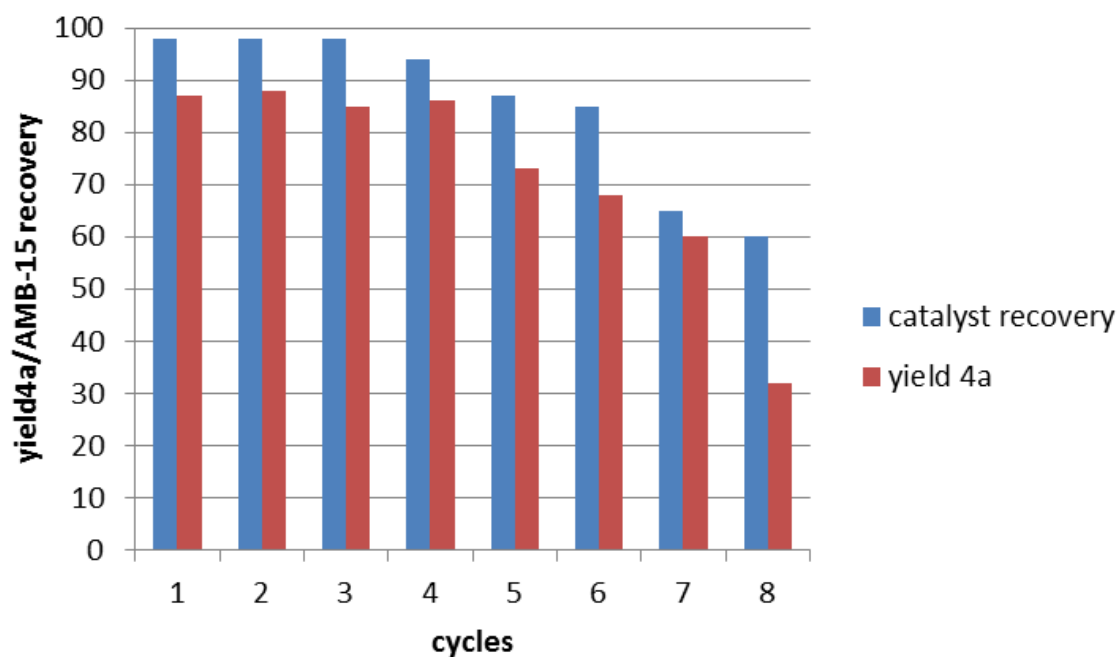

**Figure S1. Catalyst recycling and compound 4a yields**

- 1) a) Yadav, J. S., Reddy, B. V. S., Eshwaraiah, B., Anuradha, K., *Green Chem.*, **2002**, 4, 592–594;
- 2) Pal, R., Sarkar, T., Khasnobis, S., *Arkivoc*, **2012**, 1, 570-609.

### 3. Theoretical calculations

Density Functional Theory (DFT) calculations were performed with the commercial suite of software Gaussian09.<sup>3</sup> All calculations were carried out with the hybrid Generalized Gradient Approximation (GGA) mPW1PW functional<sup>4</sup> and the full-electron split valence plus polarization basis sets in the Def2SVPP formulation<sup>5,6</sup> for all atomic species. NBO populations<sup>7</sup> were calculated at the optimized geometries, whose nature was verified by harmonic frequency calculations (no negative frequencies with module larger than 15 cm<sup>-1</sup> were found). The results of the calculations were examined with GaussView 5.0.9<sup>8</sup> and Molden 5.3<sup>9</sup> programs.

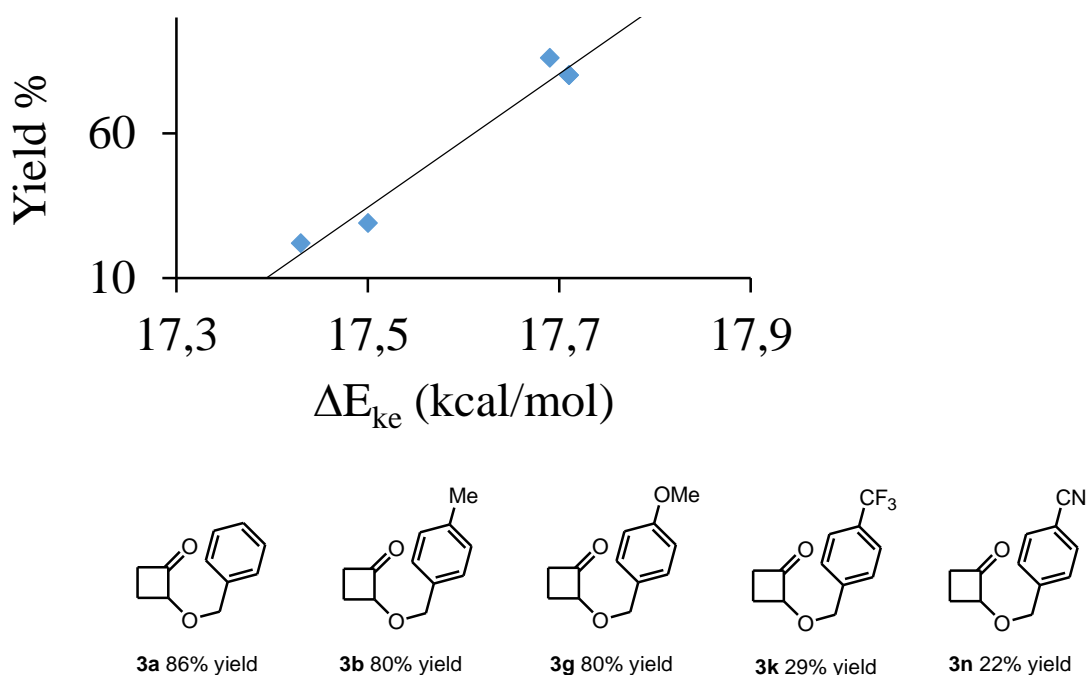

**Figure S2.** DFT-calculated total electronic energy difference calculated for the keto-enol equilibrium *iii* in Scheme 3 and reaction yield in the synthesis of **3a**, **b**, **g**, **k**, **n**.

3) Gaussian 09, Revision D.01, M. J. Frisch, G. W. Trucks, H. B. Schlegel, G. E. Scuseria, M. A. Robb, J. R. Cheeseman, G. Scalmani, V. Barone, G. A. Petersson, H. Nakatsuji, X. Li, M. Caricato, A. Marenich, J. Bloino, B. G. Janesko, R. Gomperts, B. Mennucci, H. P. Hratchian, J. V. Ortiz, A. F. Izmaylov, J. L. Sonnenberg, D. Williams-Young, F. Ding, F. Lipparini, F. Egidi, J. Goings, B. Peng, A. Petrone, T. Henderson, D. Ranasinghe, V. G. Zakrzewski, J. Gao, N. Rega, G. Zheng, W. Liang, M. Hada, M. Ehara, K. Toyota, R. Fukuda, J. Hasegawa, M. Ishida, T. Nakajima, Y. Honda, O. Kitao, H. Nakai, T. Vreven, K. Throssell, J. A. Montgomery, Jr., J. E. Peralta, F. Ogliaro, M. Bearpark, J. J. Heyd, E. Brothers, K. N. Kudin, V. N. Staroverov, T. Keith, R. Kobayashi, J. Normand, K. Raghavachari, A. Rendell, J. C. Burant, S. S. Iyengar, J. Tomasi, M. Cossi, J. M. Millam, M. Klene, C. Adamo, R. Cammi, J. W. Ochterski, R. L. Martin, K. Morokuma, O. Farkas, J. B. Foresman, and D. J. Fox, Gaussian, Inc., Wallingford CT, **2016**.

4) Adamo, C; Barone, V. *J. Chem. Phys.* **1998**, *108*, 664-675.

5) F. Weigend, R. Ahlrichs, *Phys. Chem. Chem. Phys.*, **2005**, *7*, 3297-3305.

6) F. Weigend, *Phys. Chem. Chem. Phys.*, **2006**, *8*, 1057-1065.

7) (a) Reed, A. E.; Weinhold, F. *J. Chem. Phys.* **1983**, *78*, 4066-4073; (b) Reed, A. E.; Weinstock, R. B.; Weinhold, F. *J. Chem. Phys.* **1985**, *83*, 735-746; (c) Reed, A. E.; Curtiss, L. A.; Weinhold, F. *Chem. Rev.* **1988**, *88*, 899-926.

8) GaussView, Version 5, Dennington, R.; Keith, T.; Millam, J. Semichem Inc., Shawnee Mission KS, **2009**.

9) Schaftenaar, G.; Noordik, J. H. *J. Comput.-Aided Mol. Design* **2000**, *14*, 123-134.

#### 4. $^1\text{H}$ and $^{13}\text{C}$ NMR spectra of compounds 3a-3y

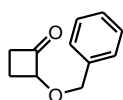

**3a** 2-Benzyloxy-cyclobutanone

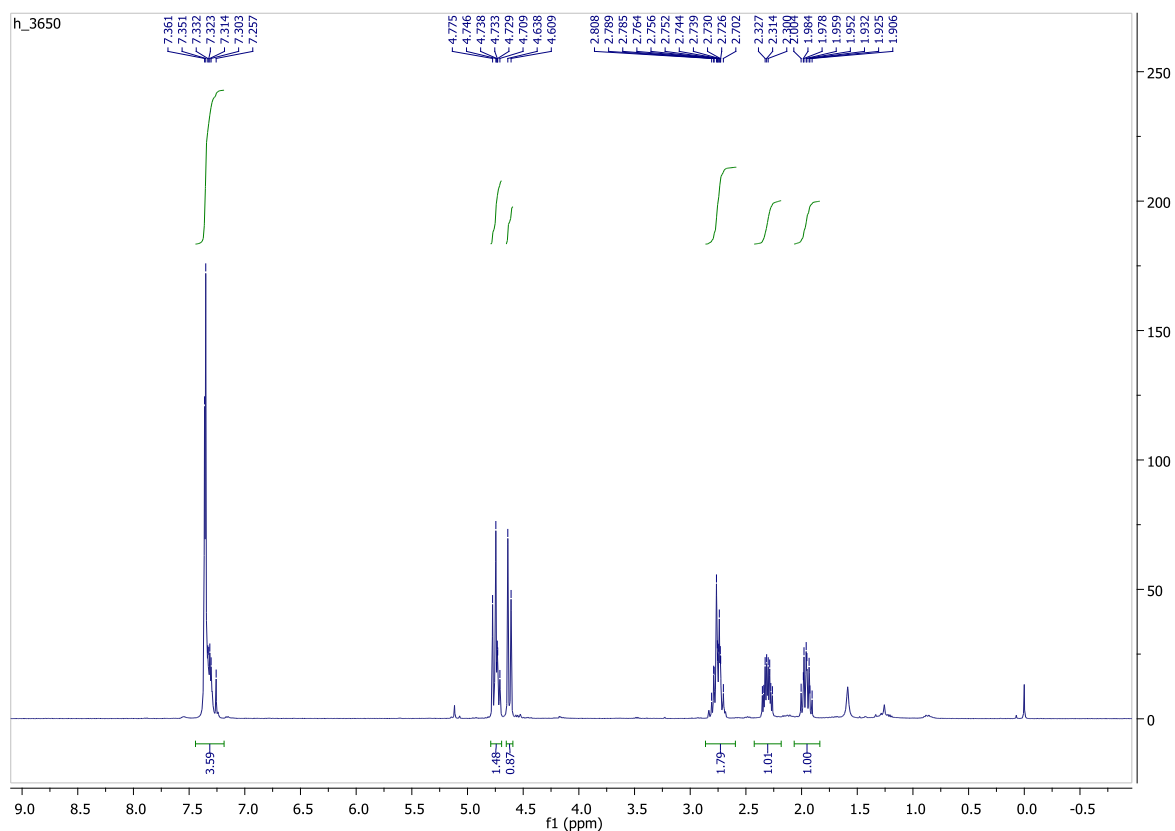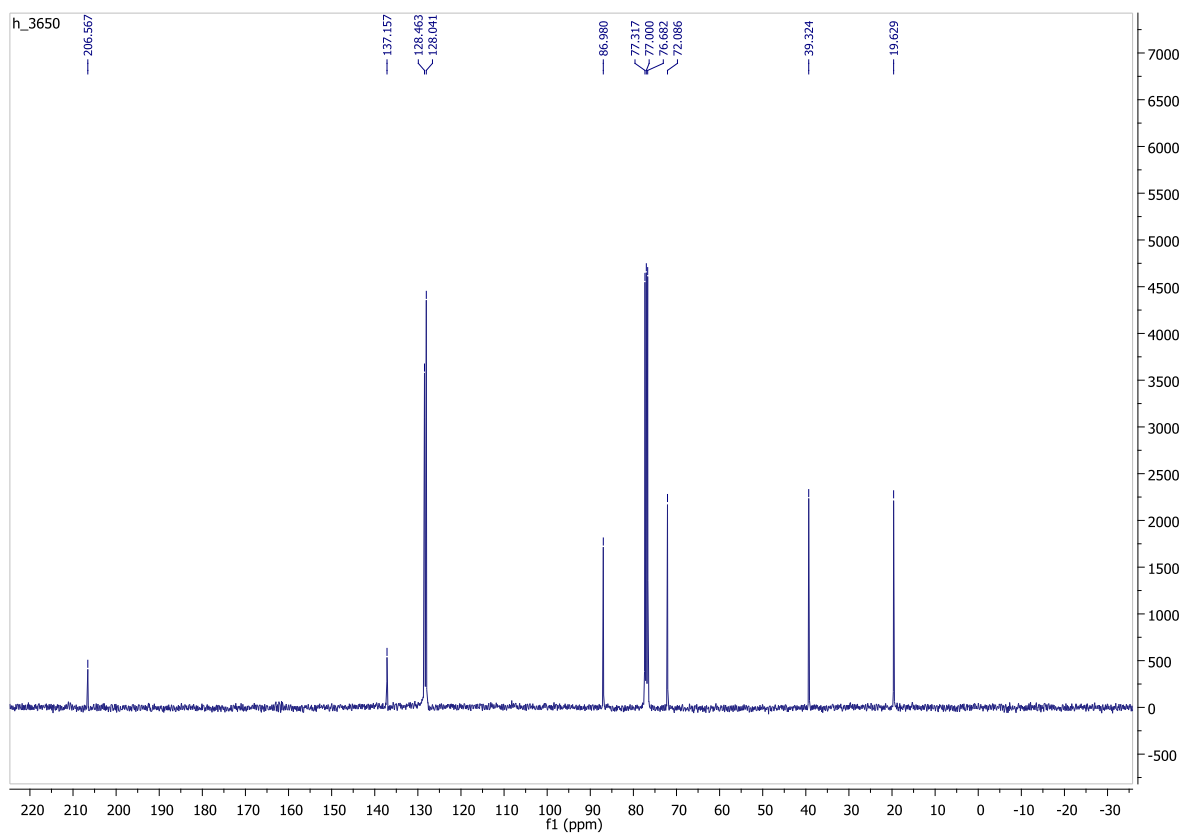

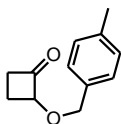

**3b** 2-(4-Methyl-benzyloxy)-cyclobutanone

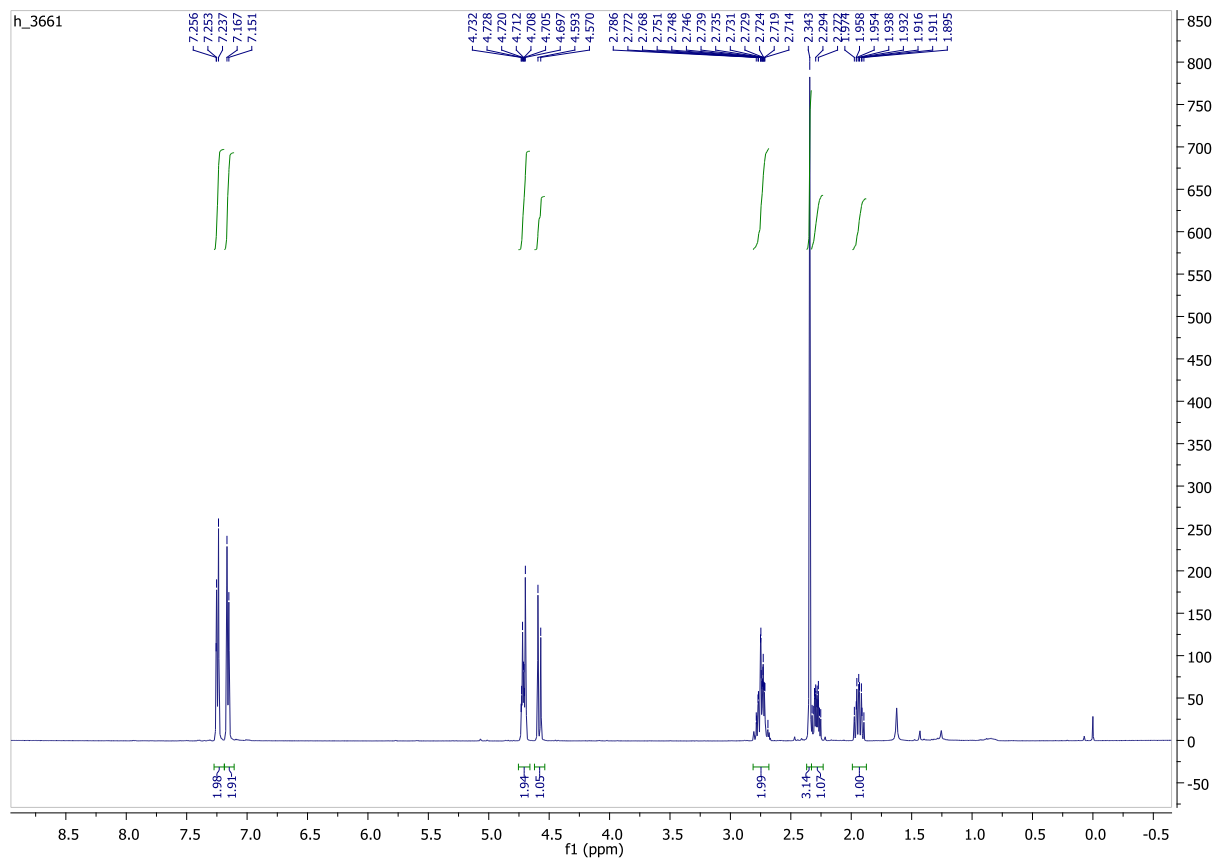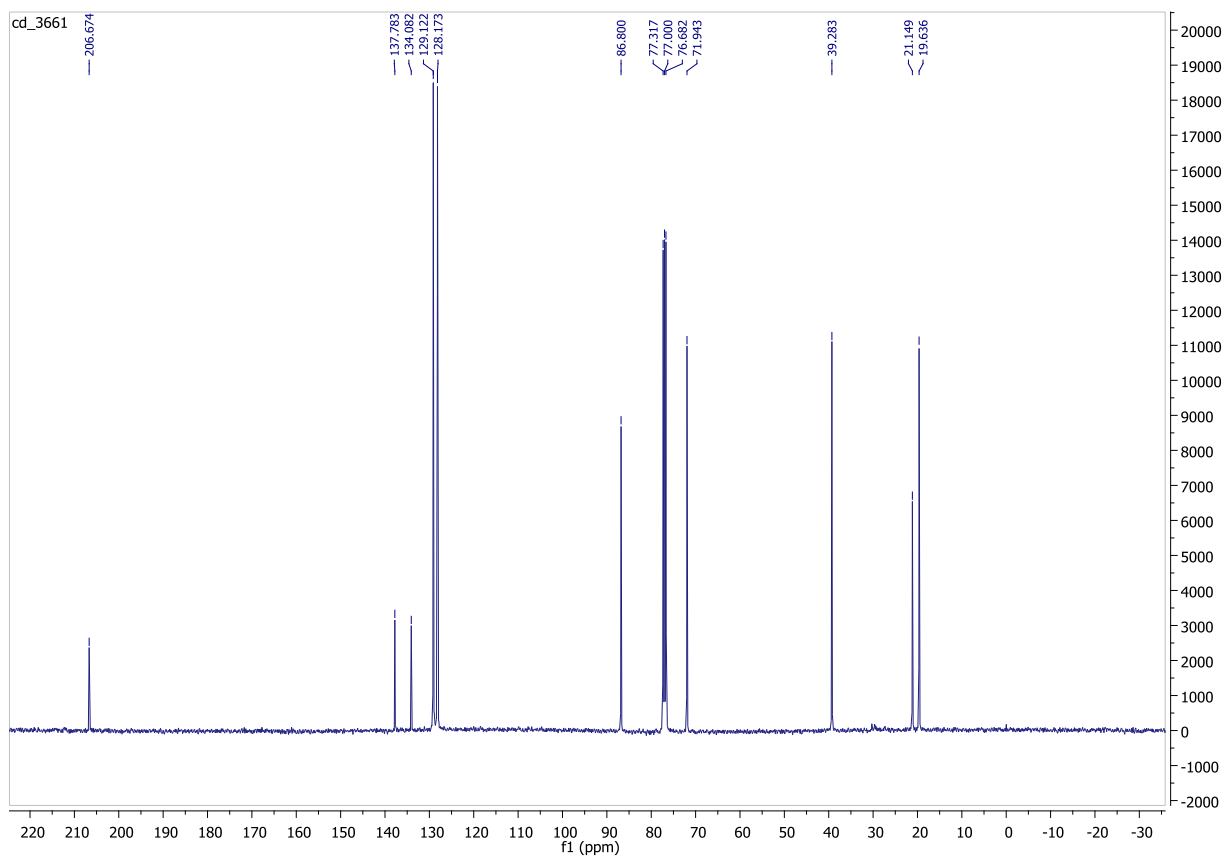

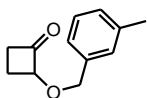

**3c** 2-(3-Methyl-benzyloxy)-cyclobutanone

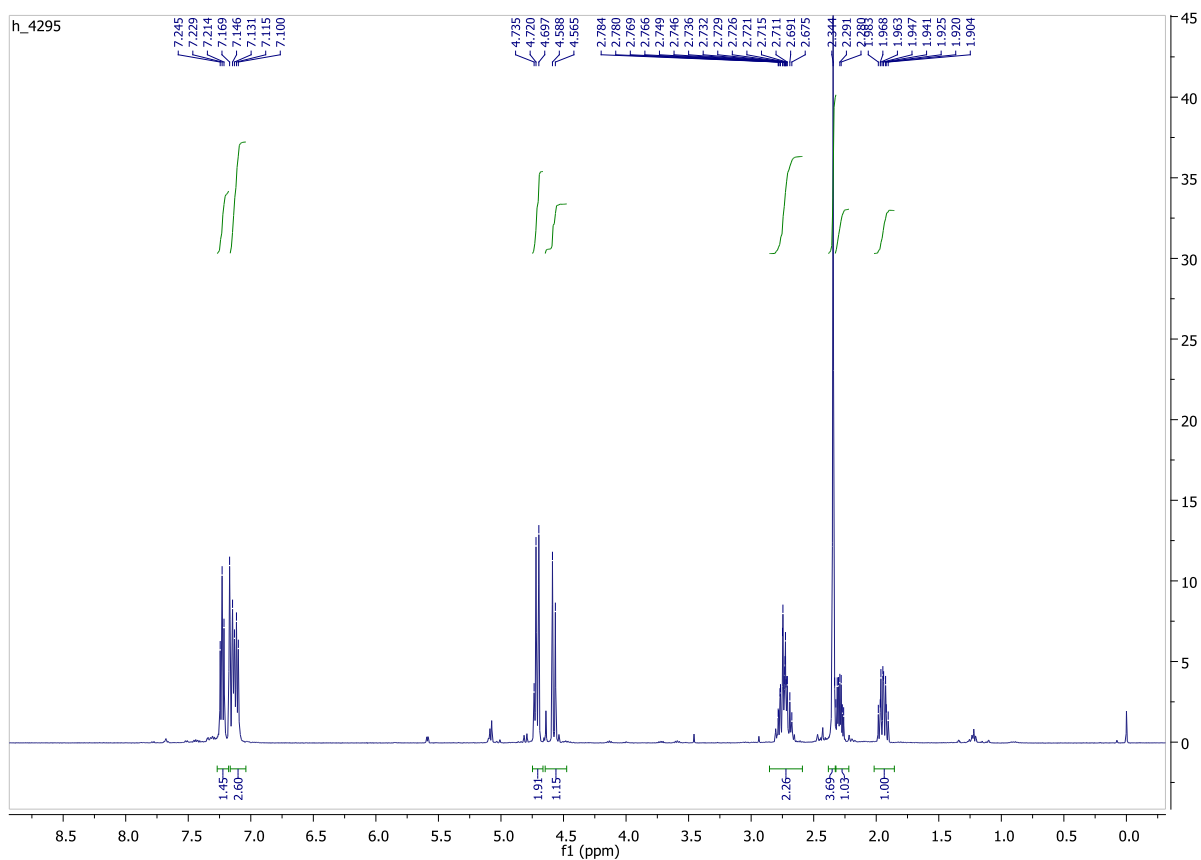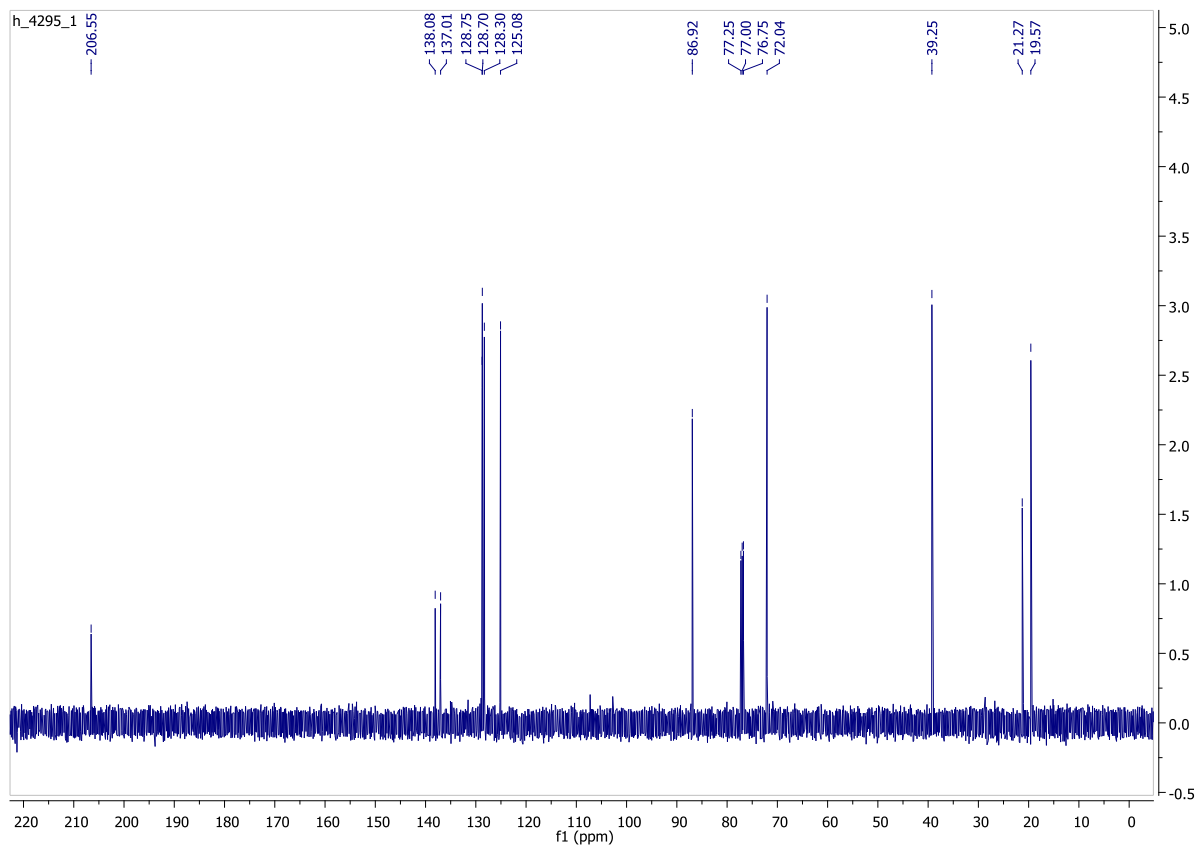

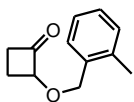

**3d** 2-(2-Methyl-benzyloxy)-cyclobutanone

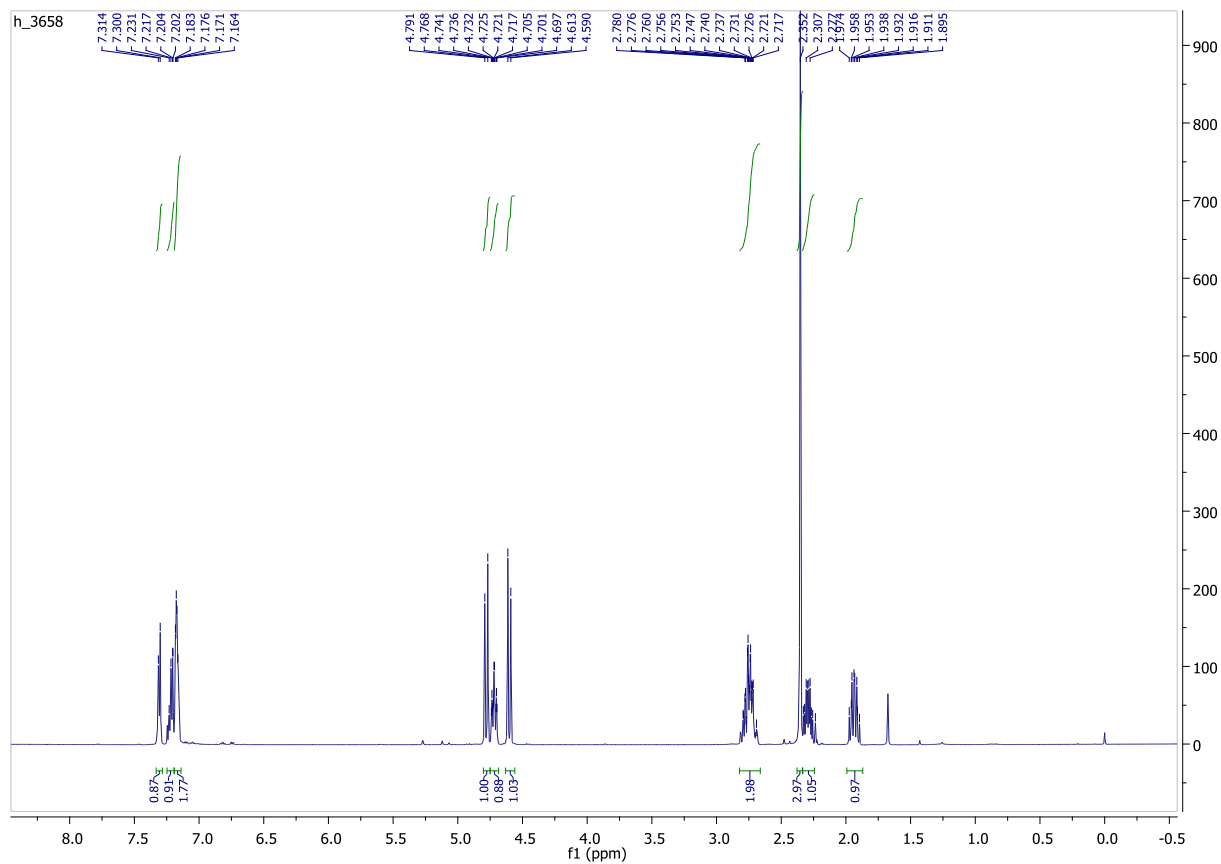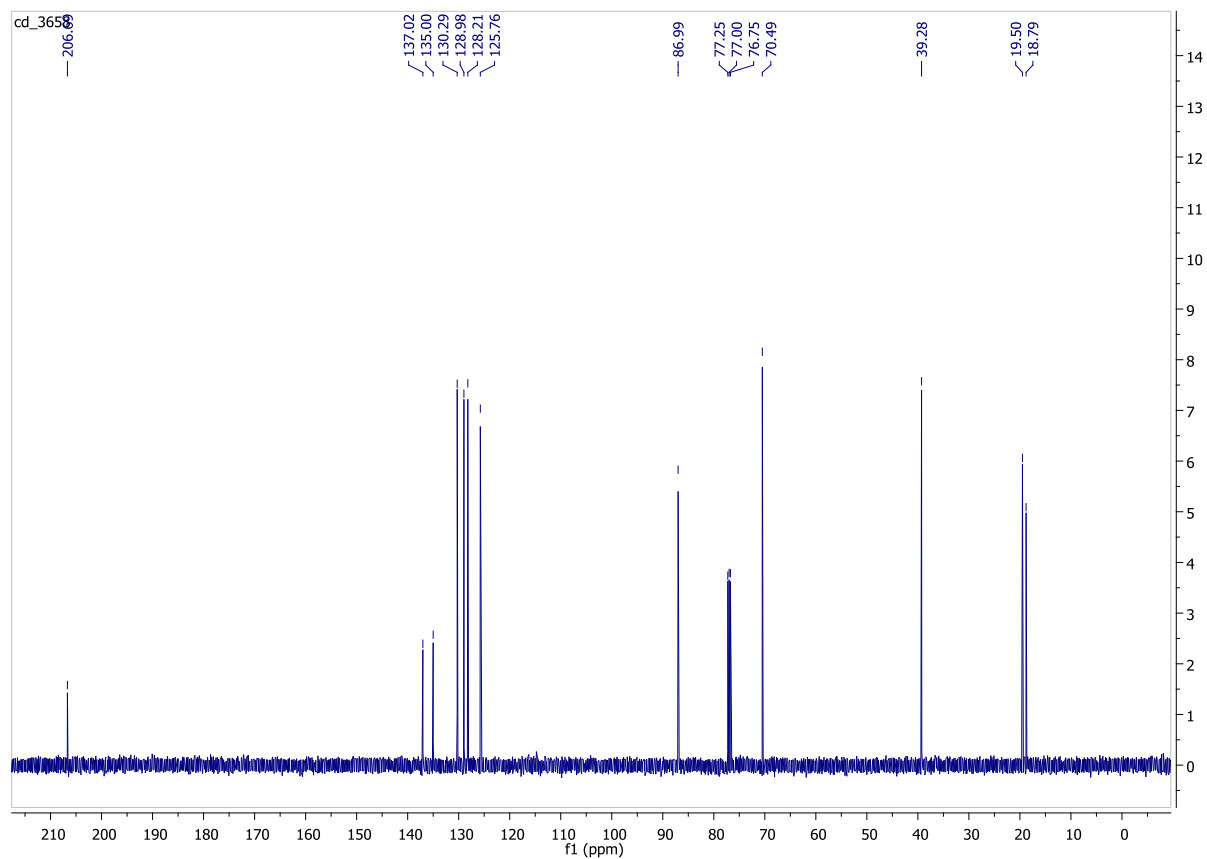



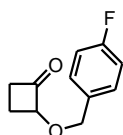

**3e**    **2-(4-Fluoro-benzyloxy)-cyclobutanone**

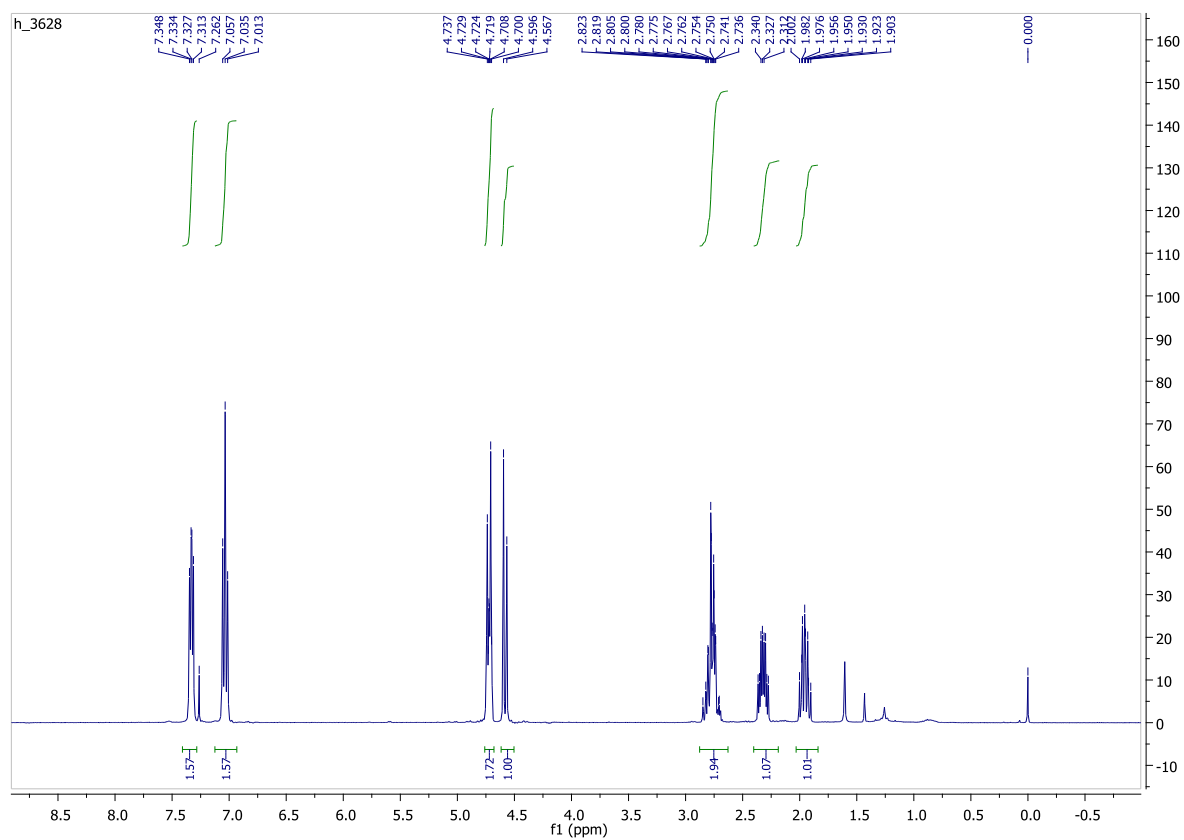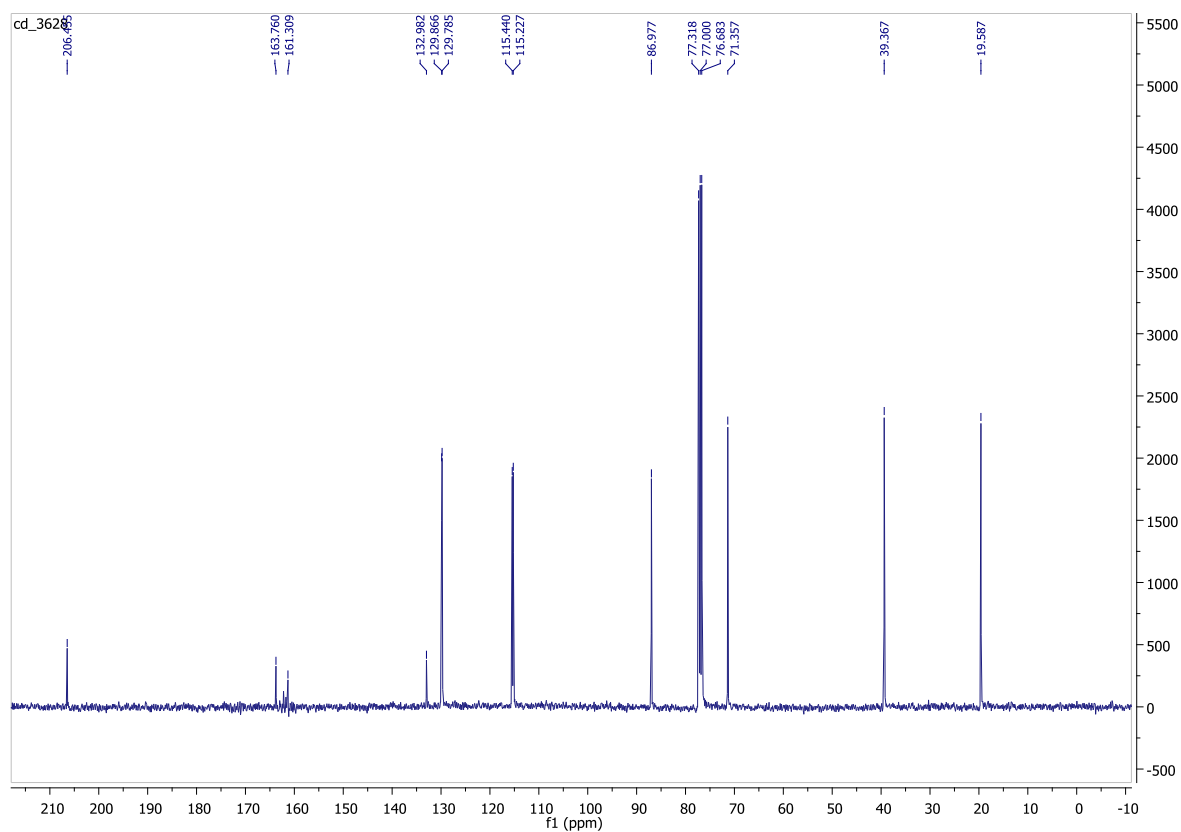

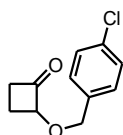

**3f**

**2-(4-Chloro-benzyloxy)-cyclobutanone**

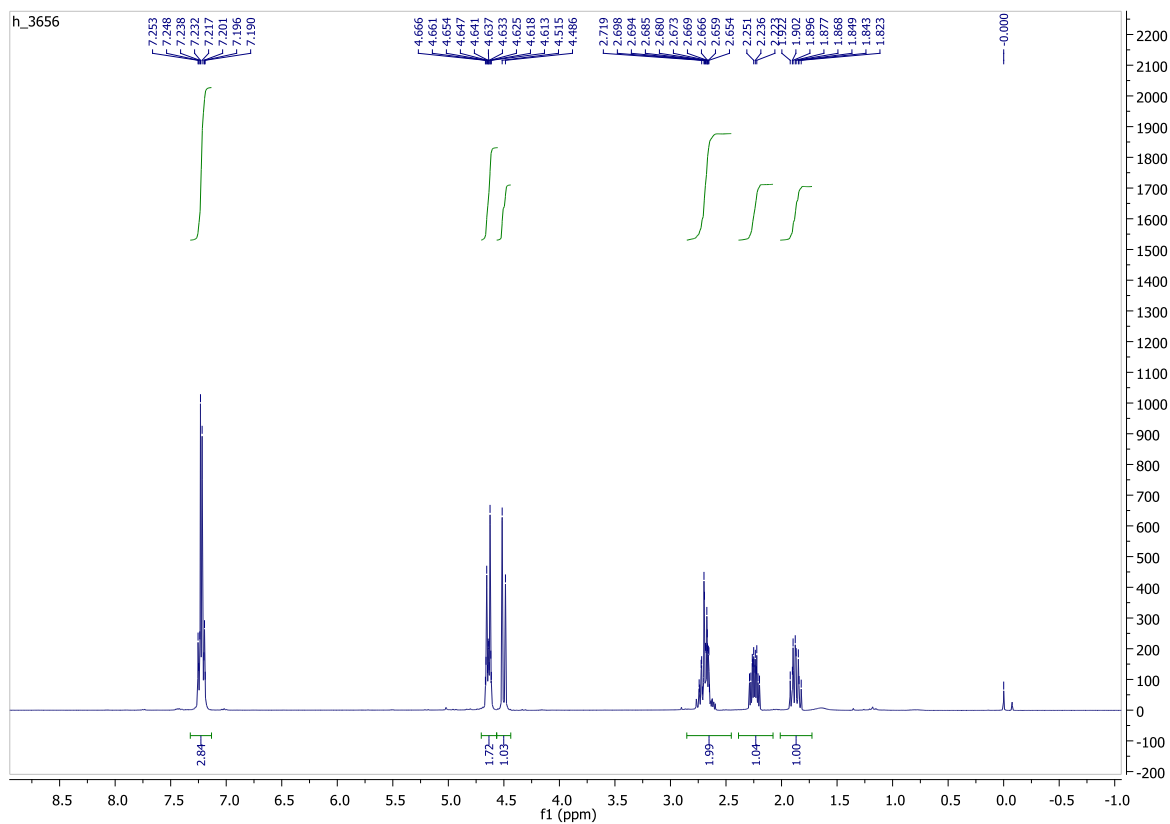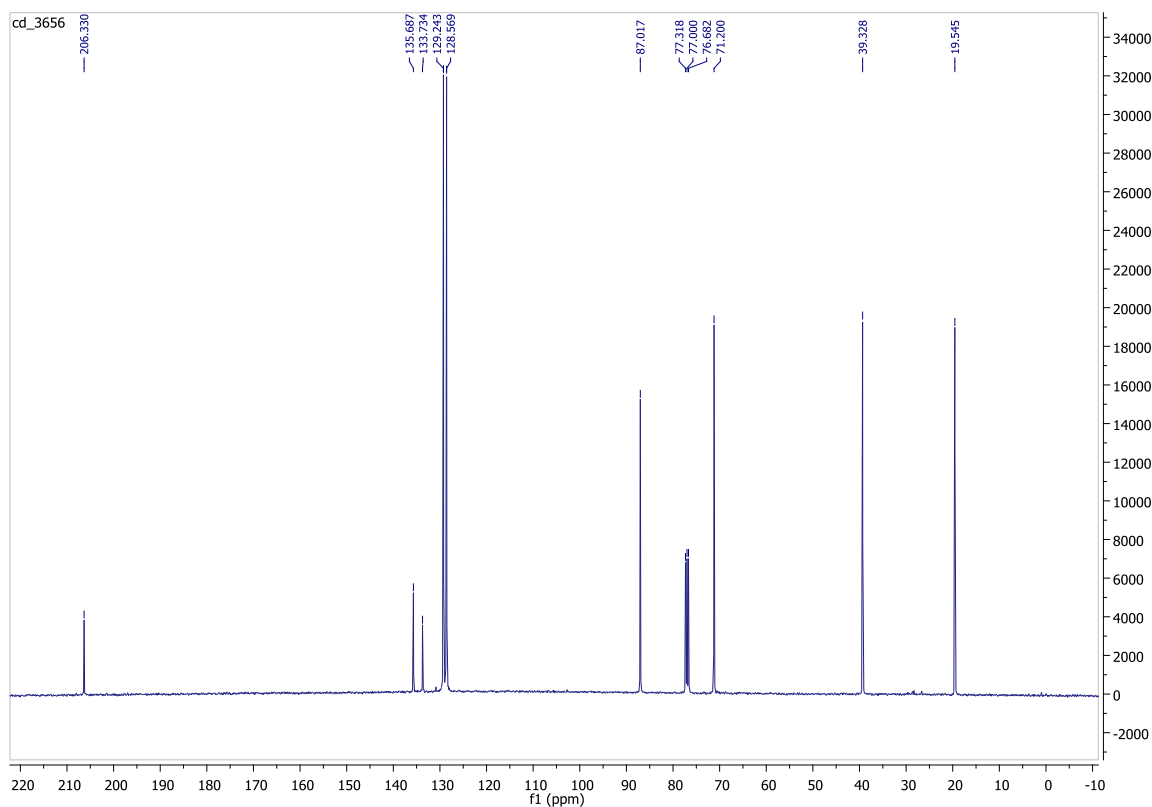

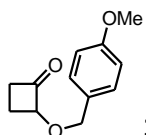

**3g** 2-(4-Methoxy-benzyloxy)-cyclobutanone

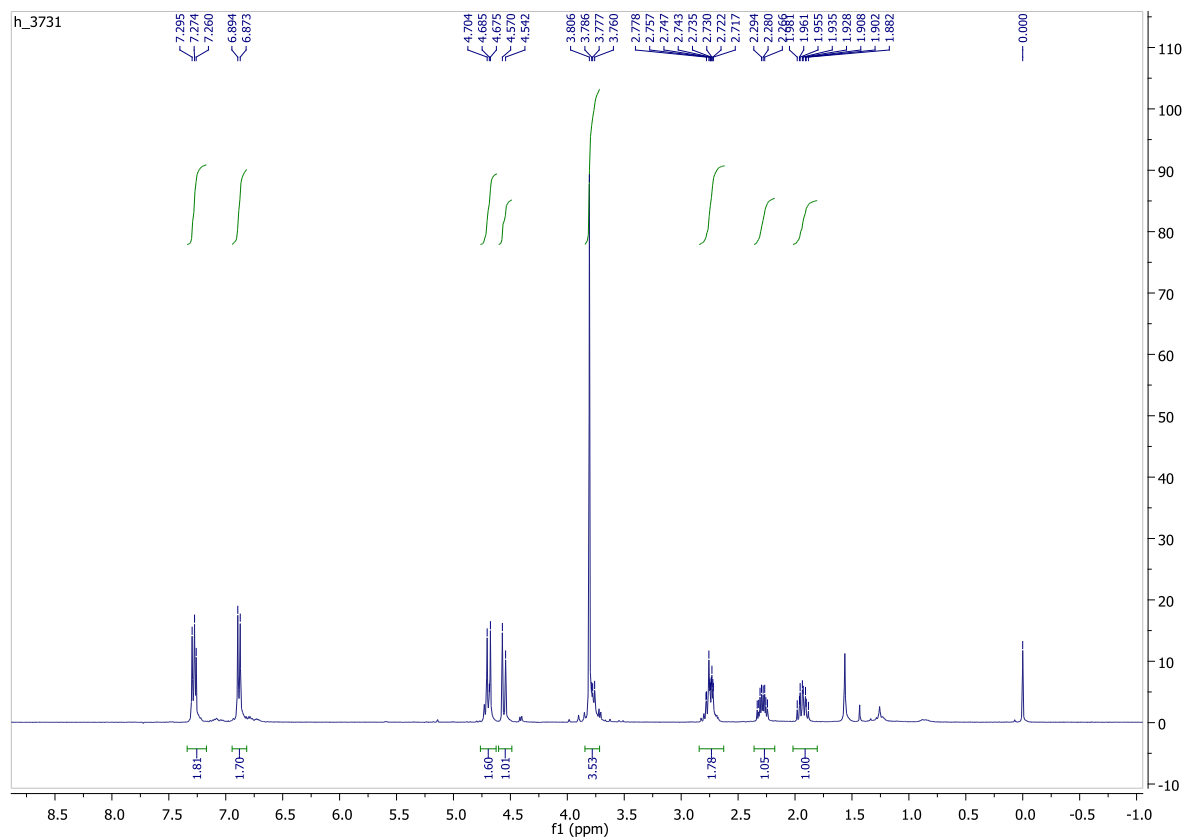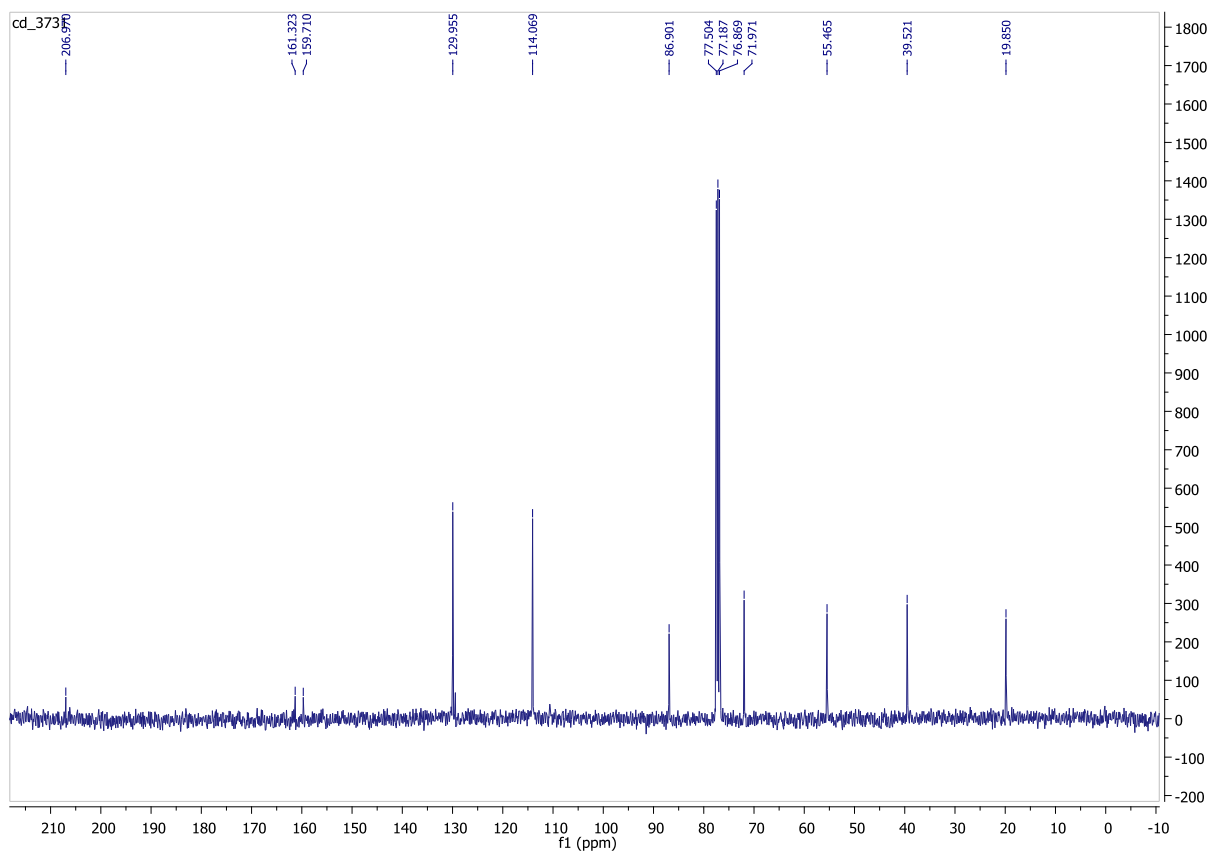

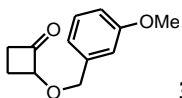

**3h** 2-(3-Methoxy-benzyloxy)-cyclobutanone

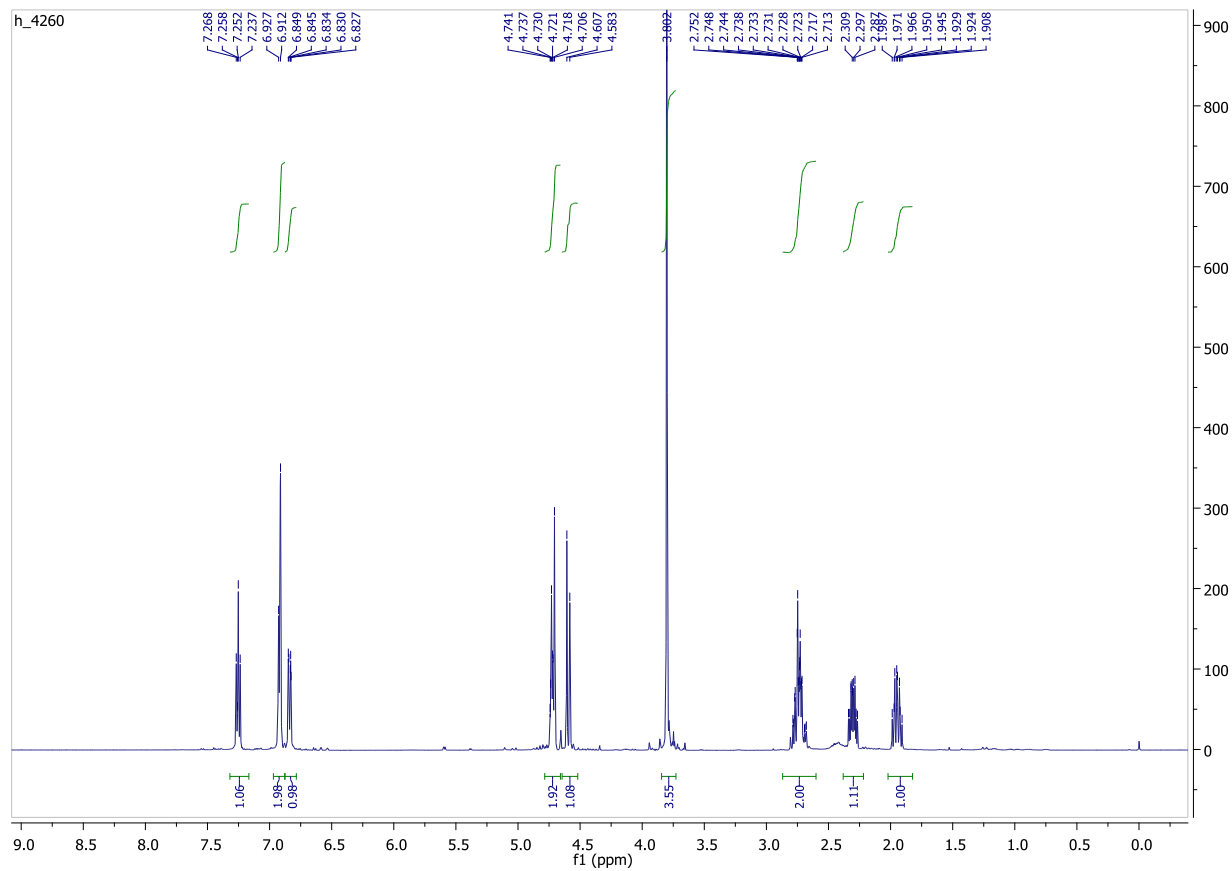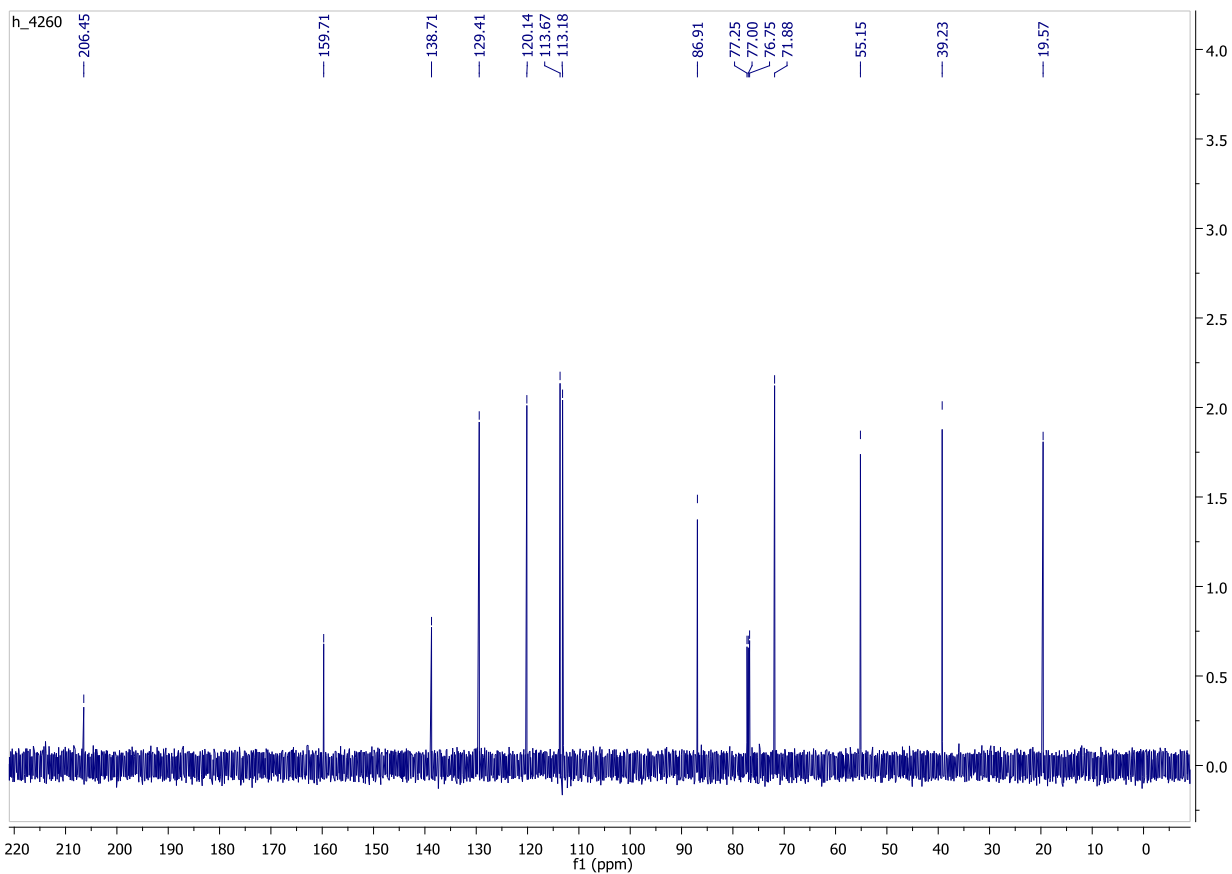

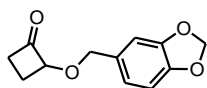

3j

2-(Benzo[1,3]dioxol-5-ylmethoxy)-cyclobutanone

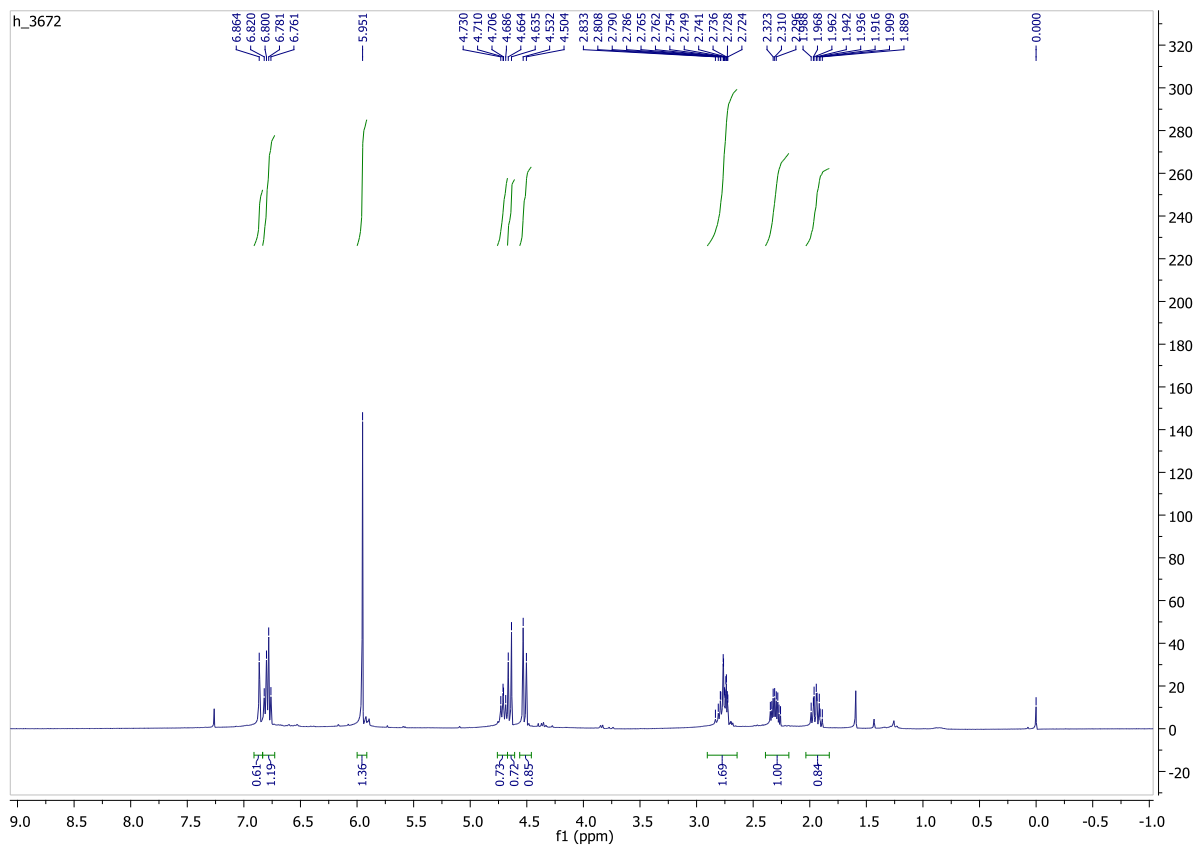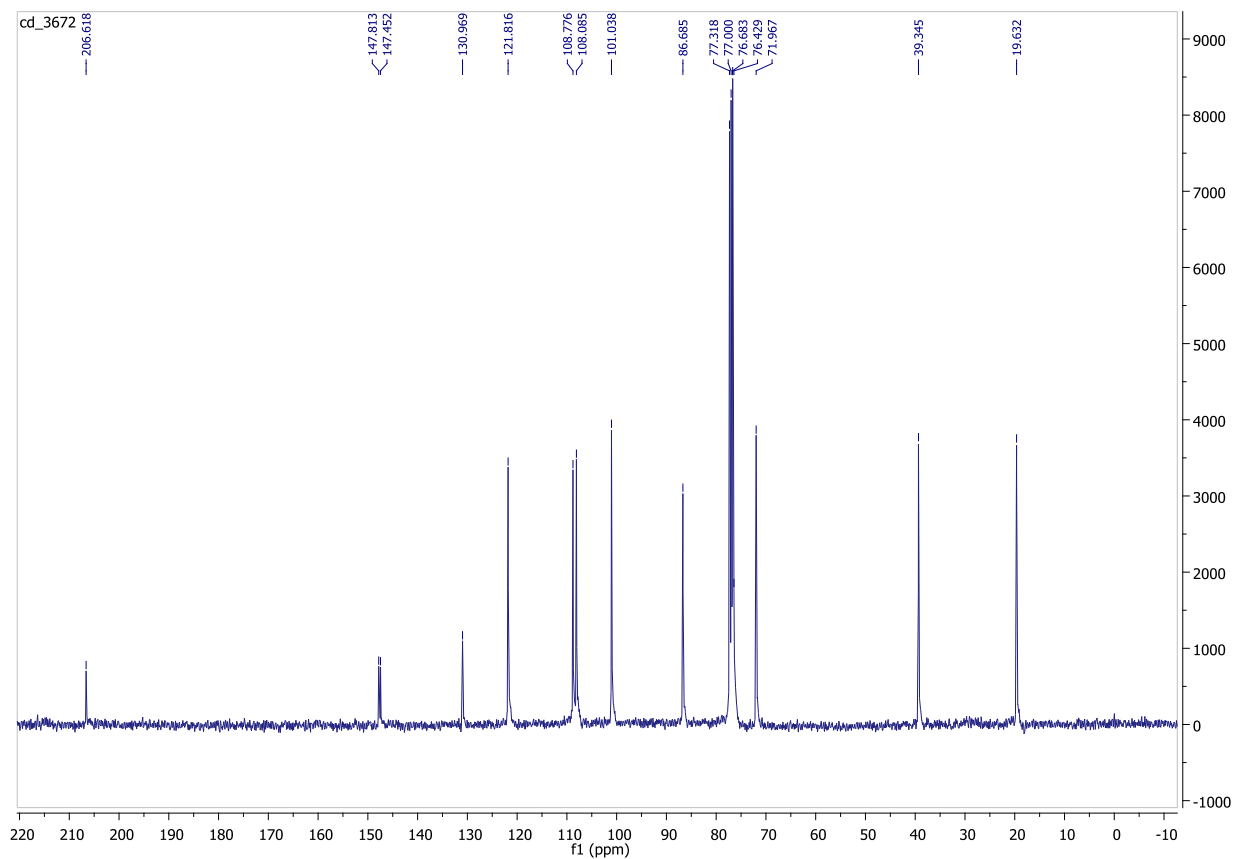

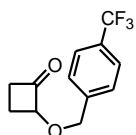

**3k** 2-(4-Trifluoromethyl-benzyloxy)-cyclobutanone

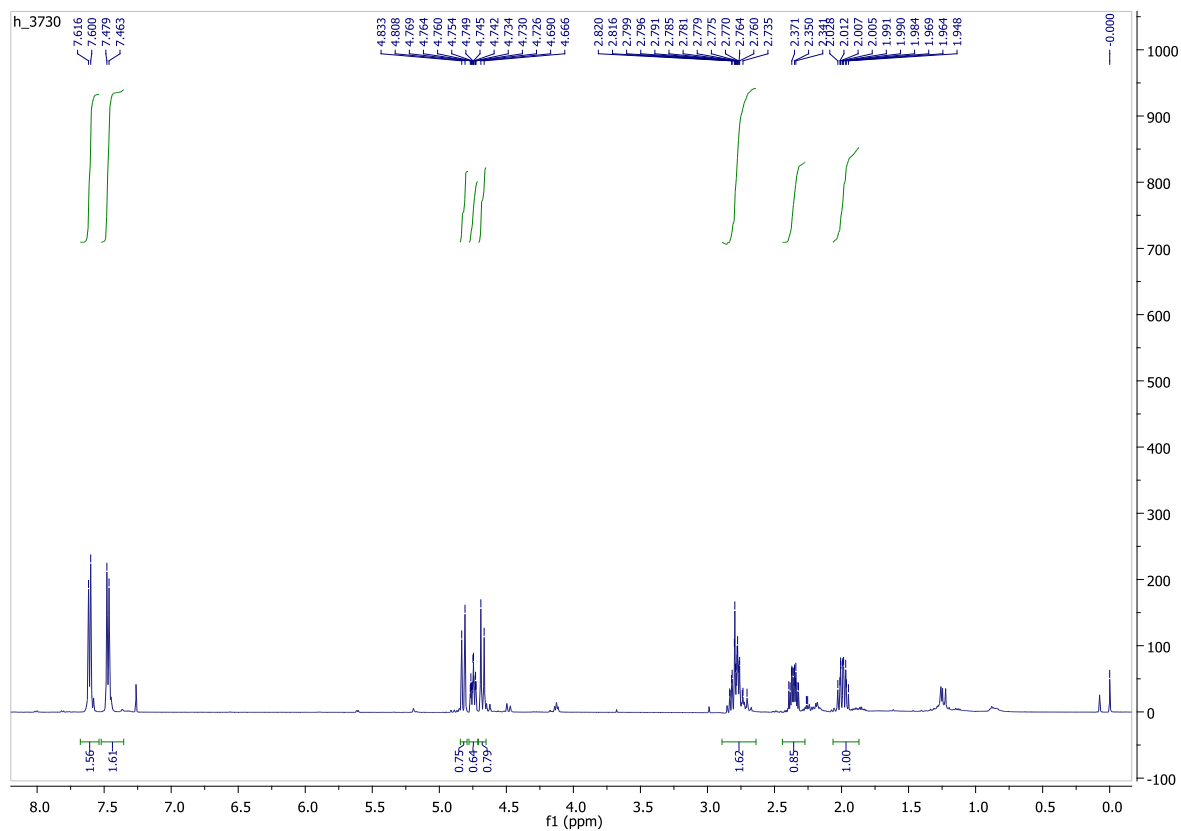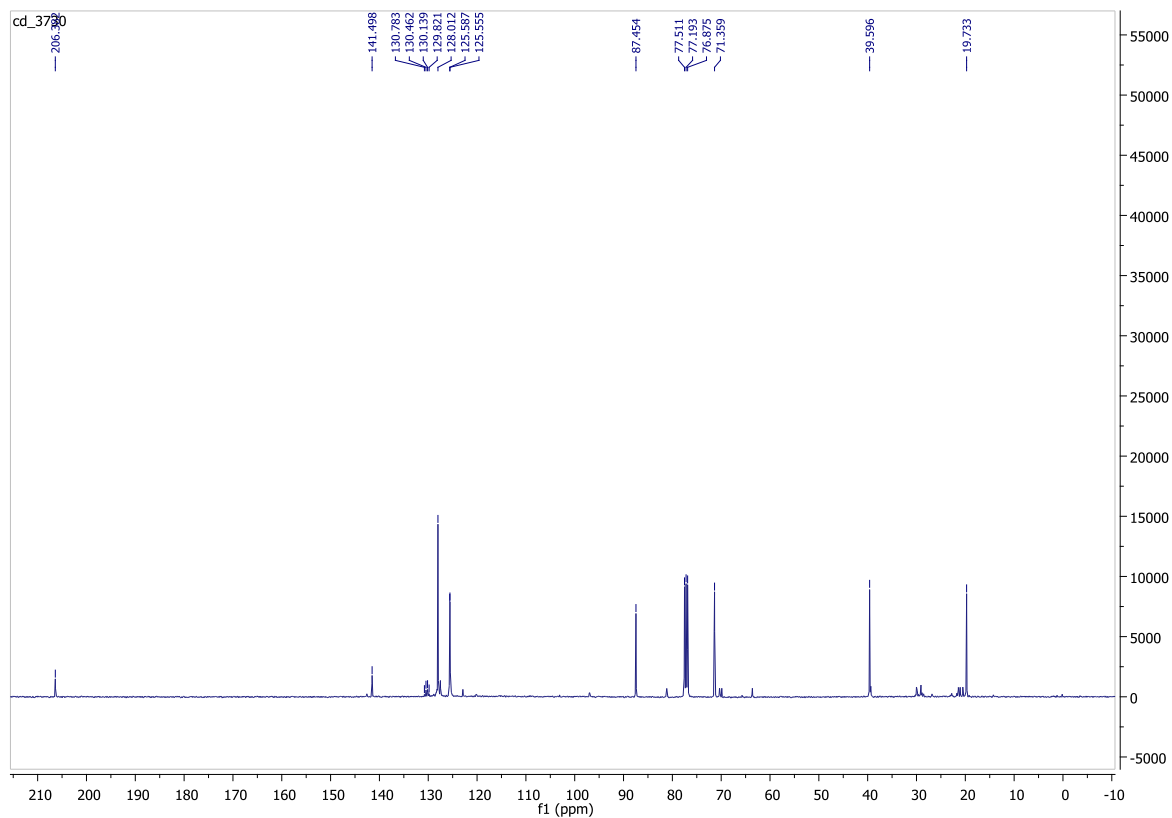

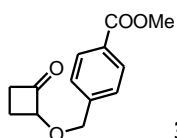

**3l** 4-(2-Oxo-cyclobutoxymethyl)-benzoic acid methyl ester

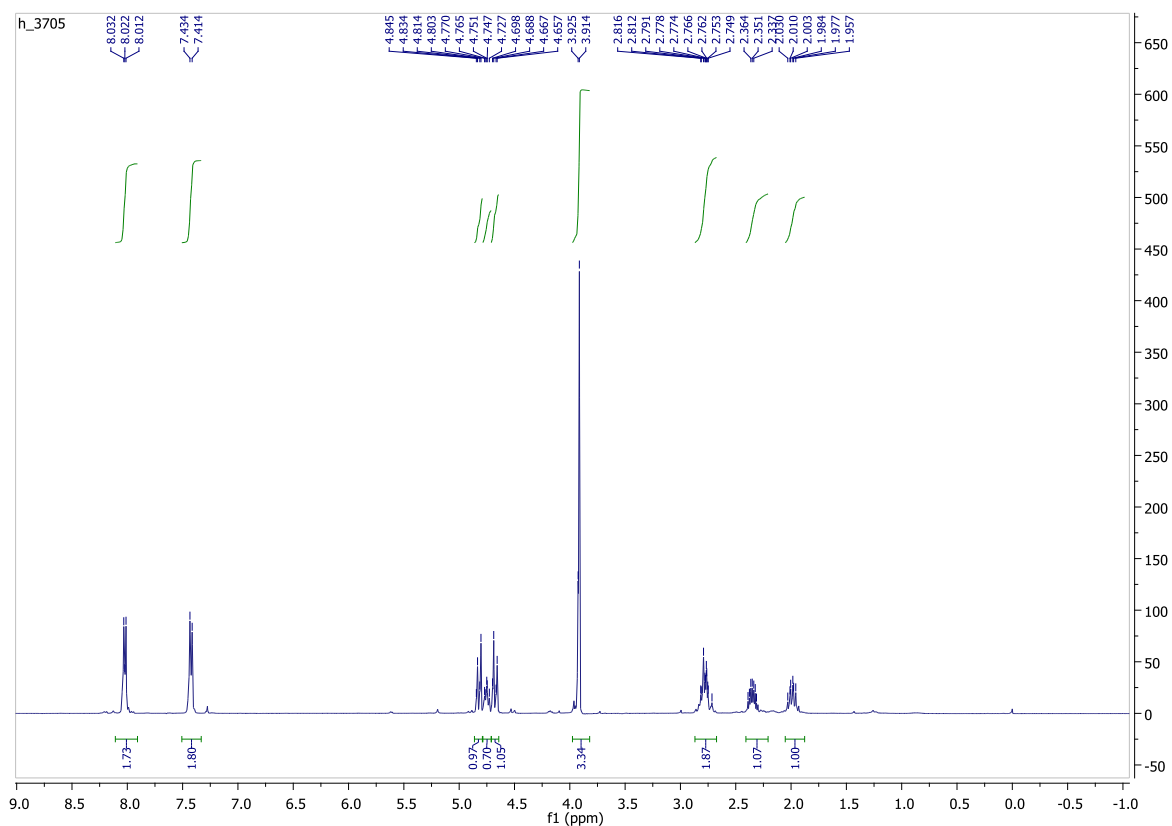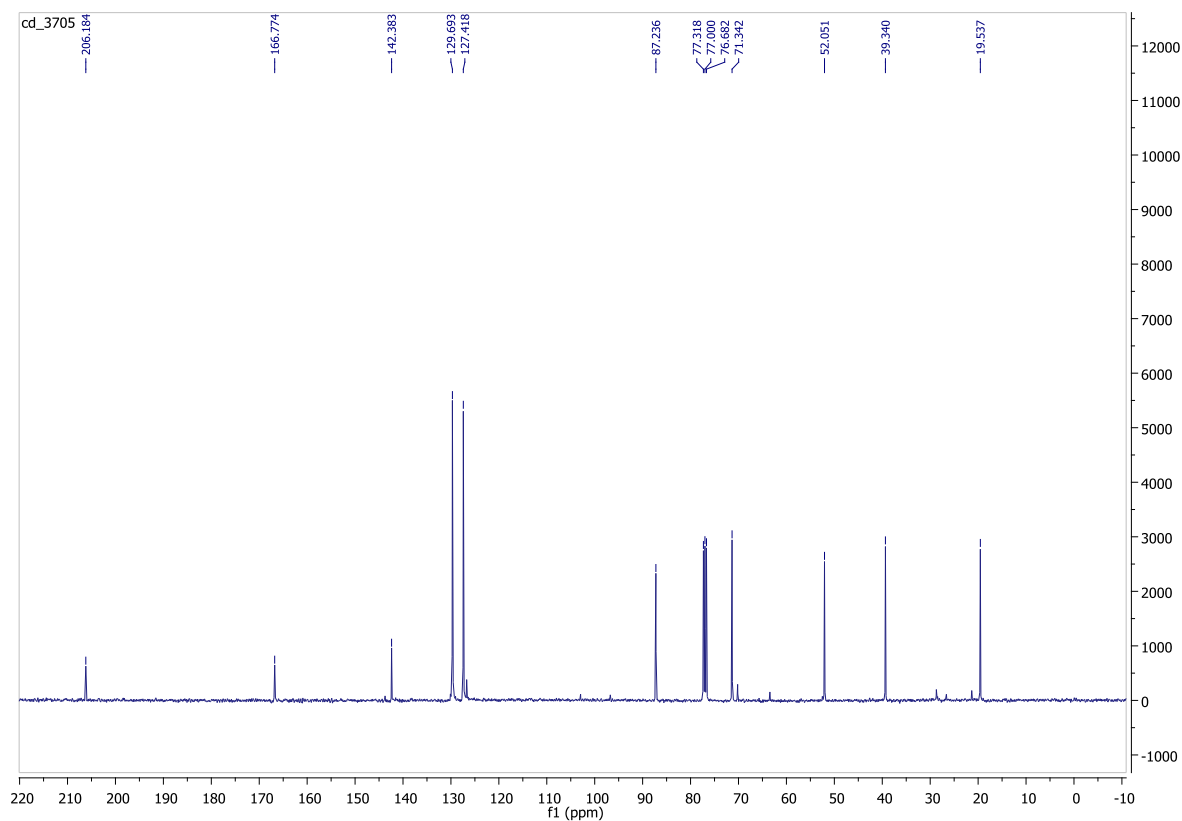

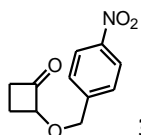

**3m** 2-(4-Nitro-benzyloxy)-cyclobutanone

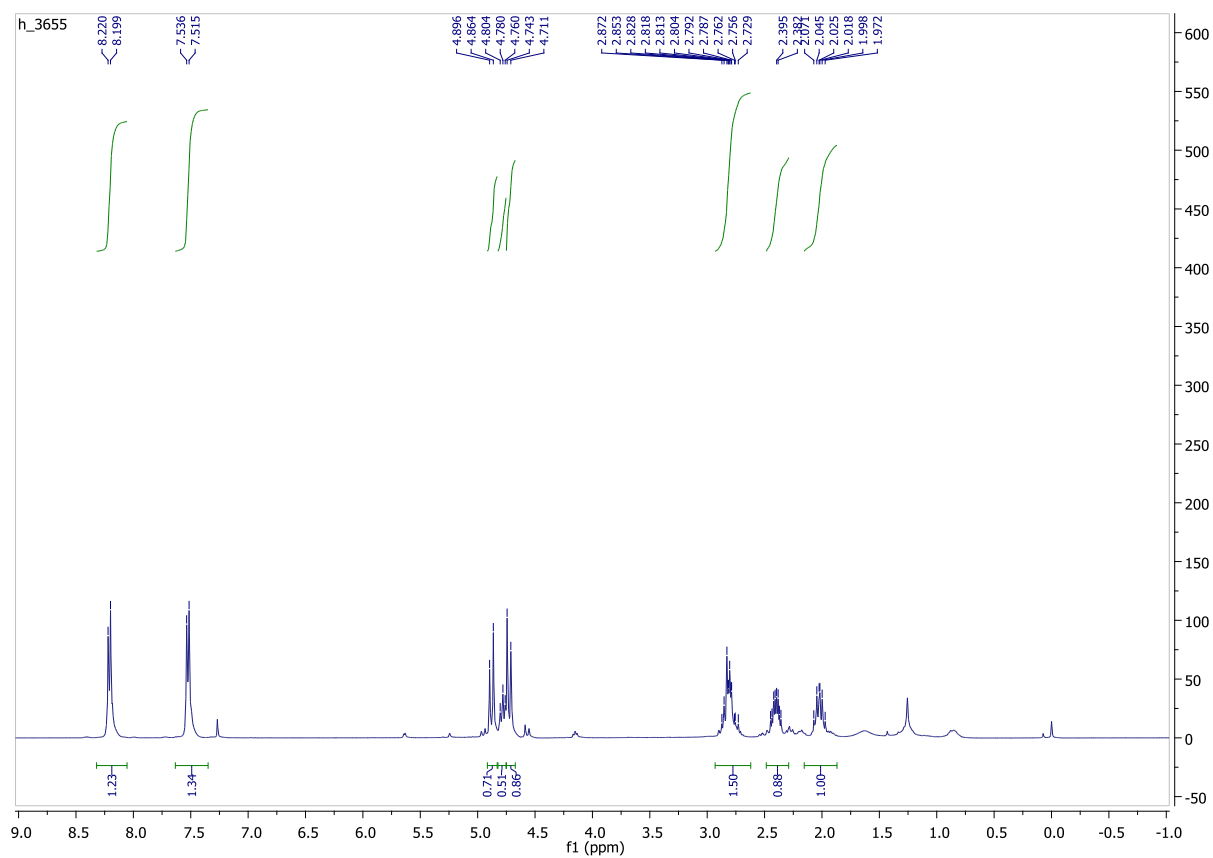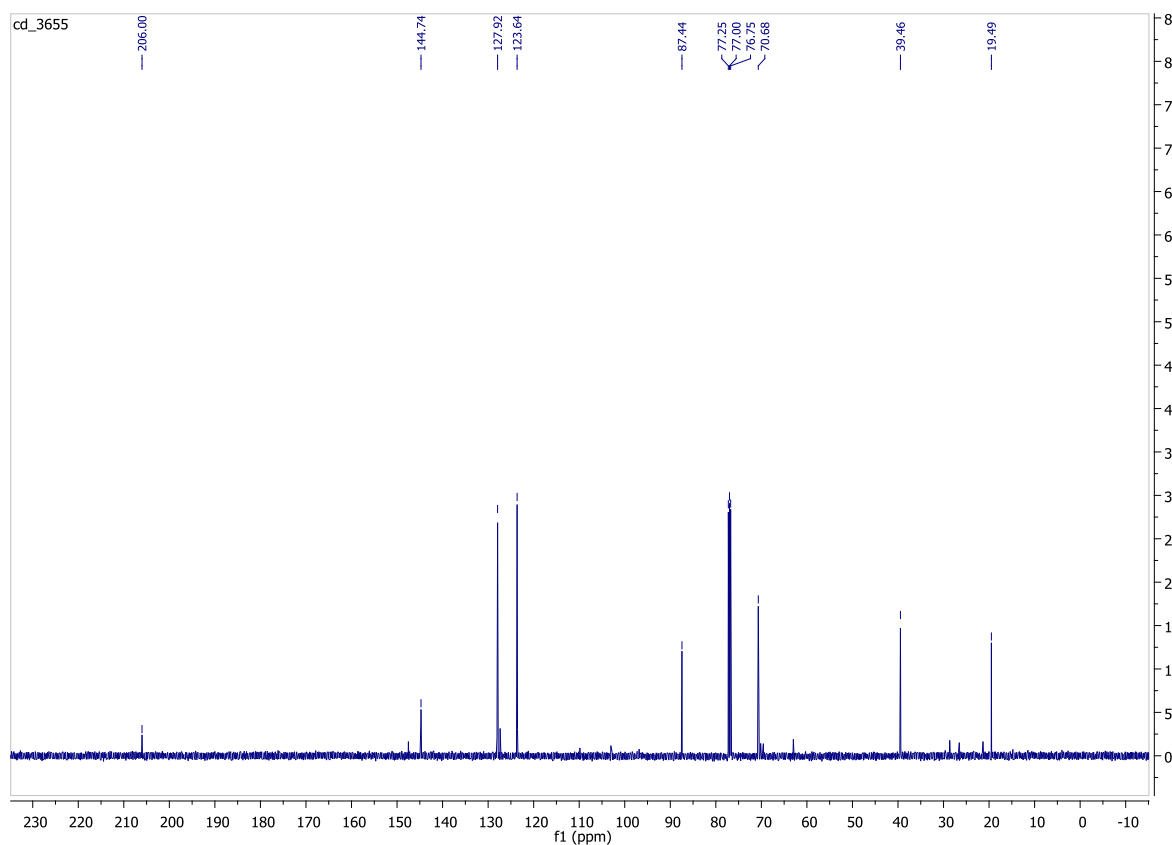



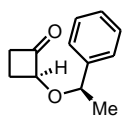

Me **3o**

**2-(1-Phenyl-ethoxy)-cyclobutanone (Major)**

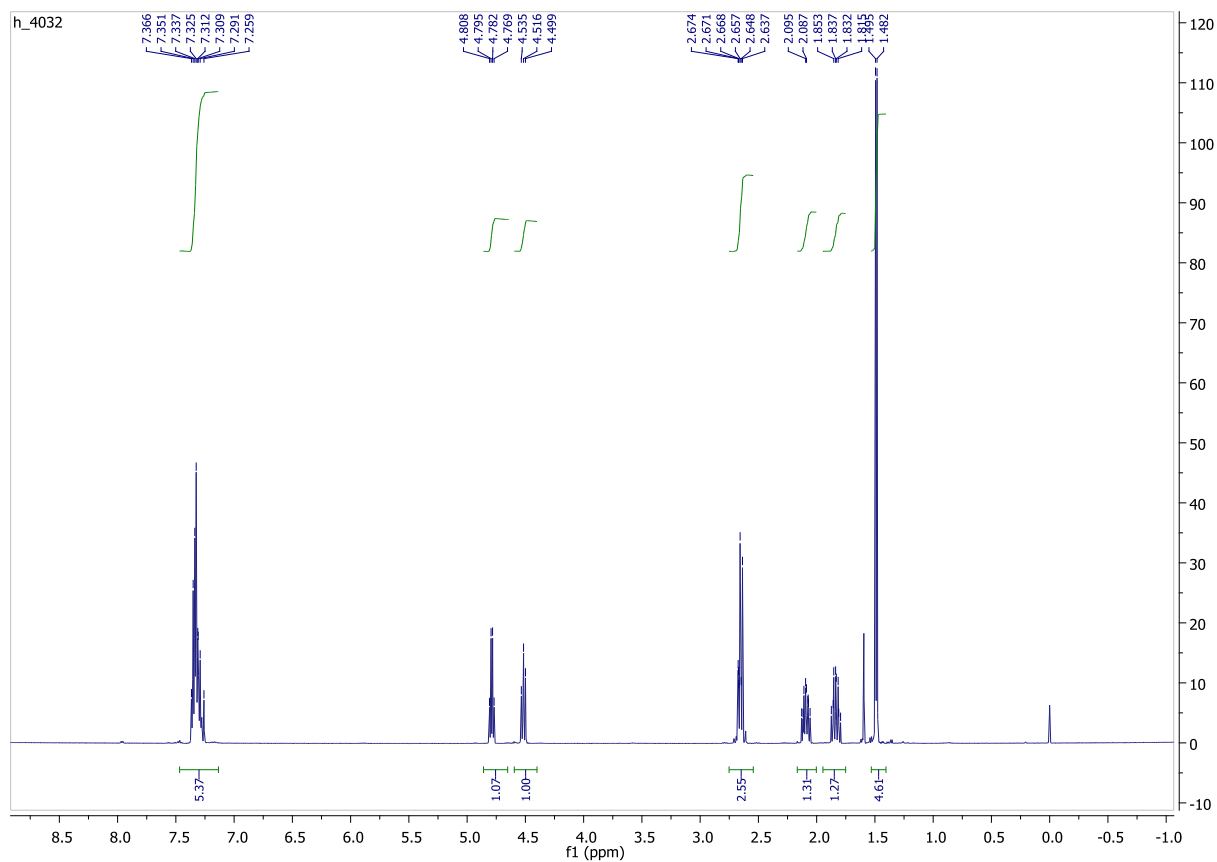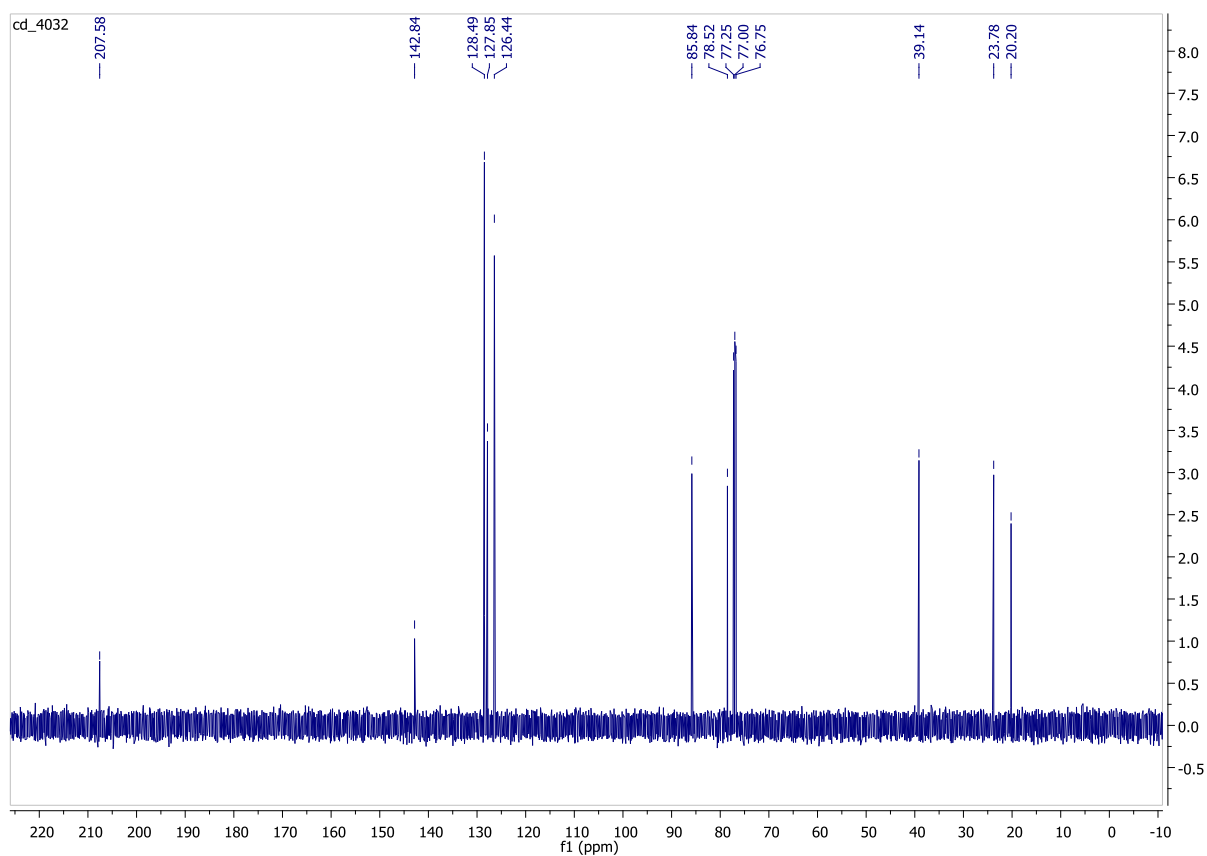

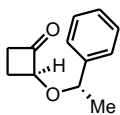

Me **30**

**2-(1-Phenyl-ethoxy)-cyclobutanone (Minor)**

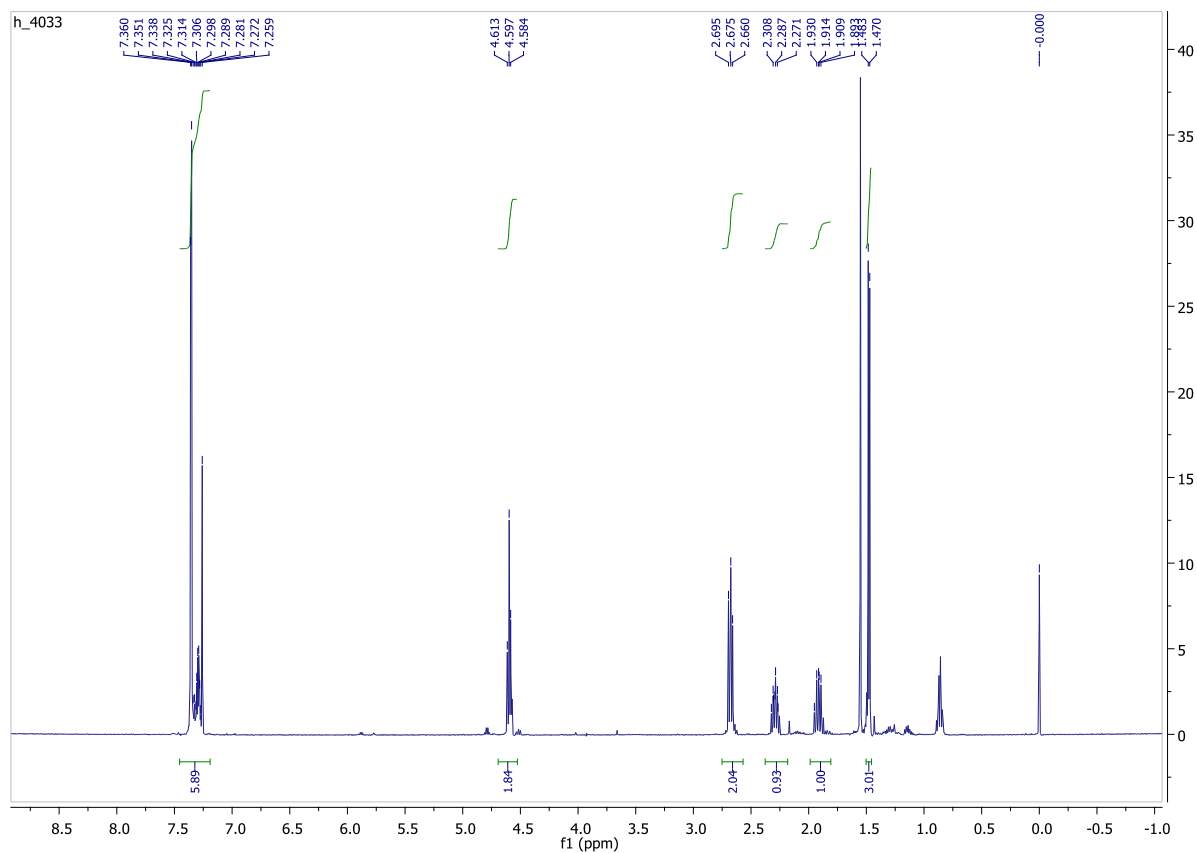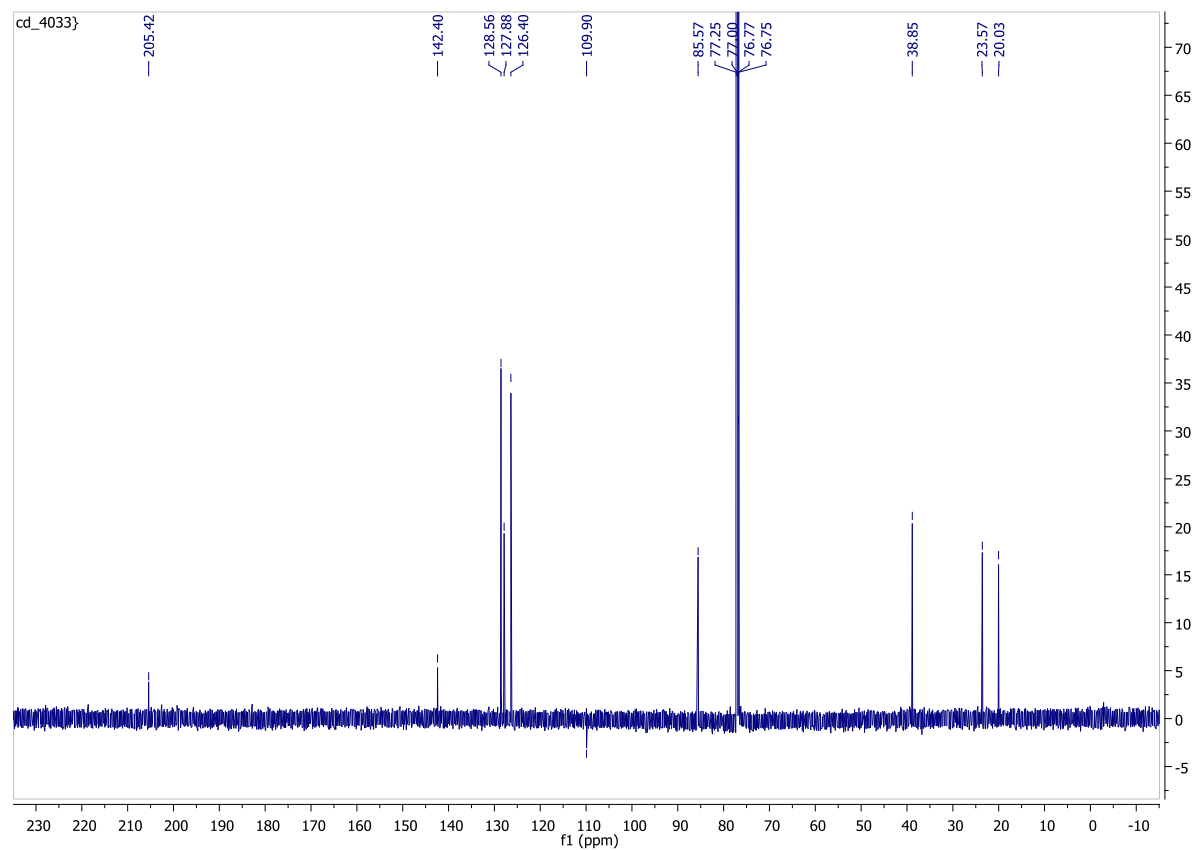

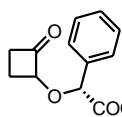

**3p**

**(2-Oxo-cyclobutoxy)-phenyl-acetic acid ethyl ester**

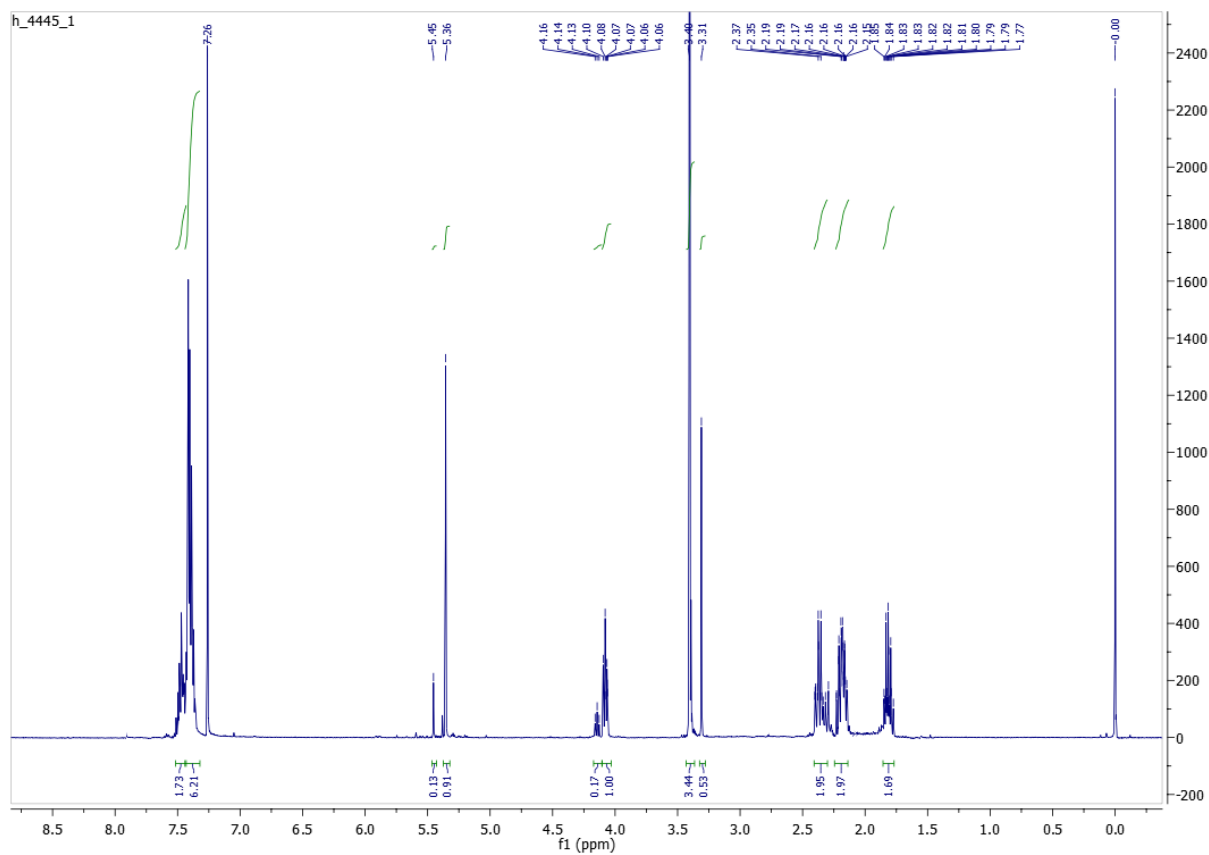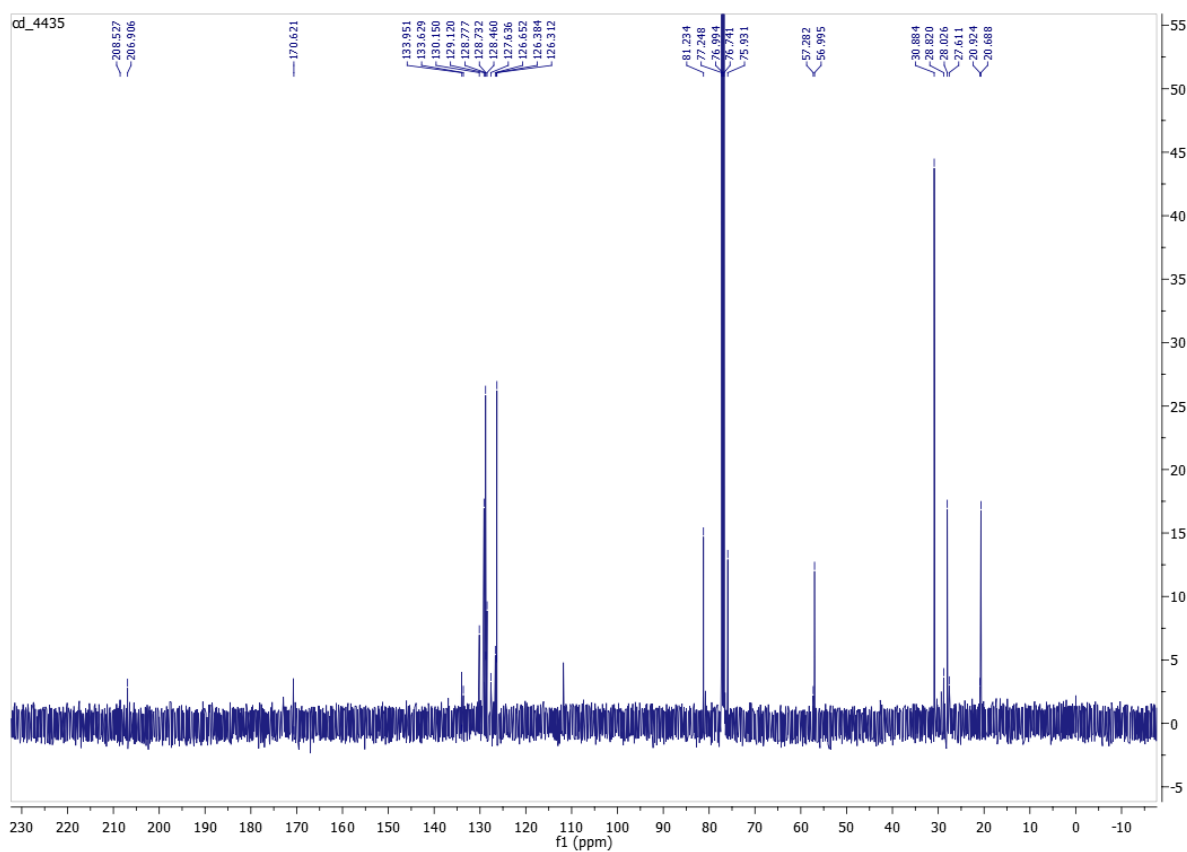

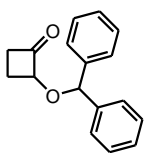

**3q** 2-Benzhydryloxy-cyclobutanone

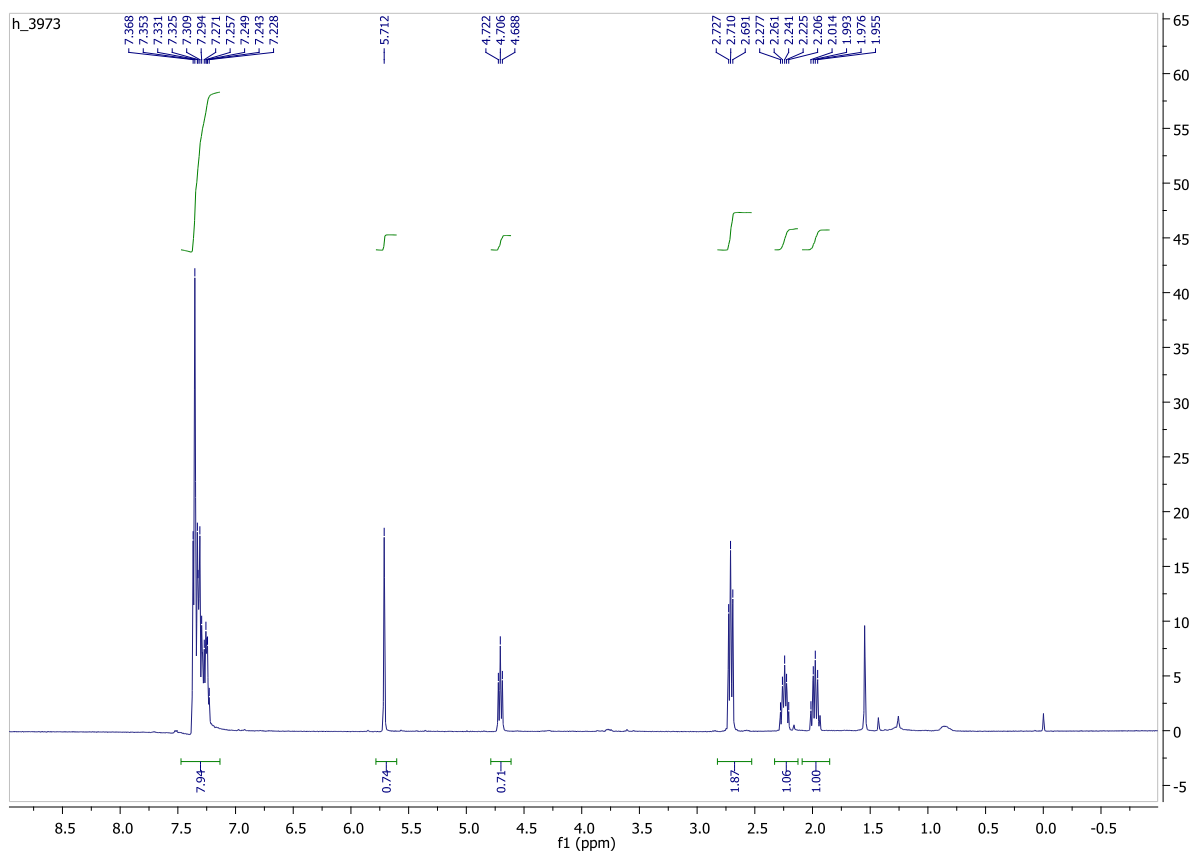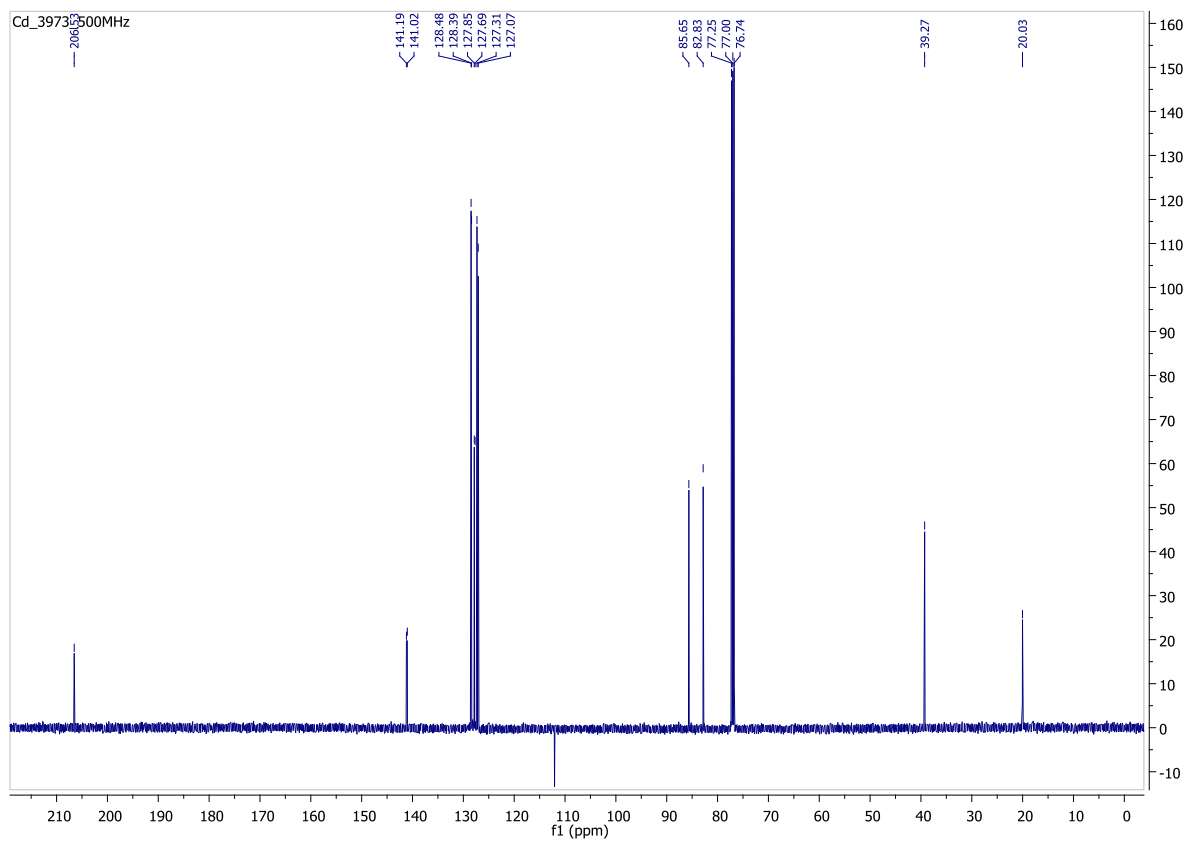

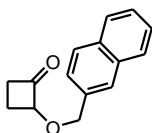

**3r**     **2-(Naphthalen-2-ylmethoxy)-cyclobutanone**

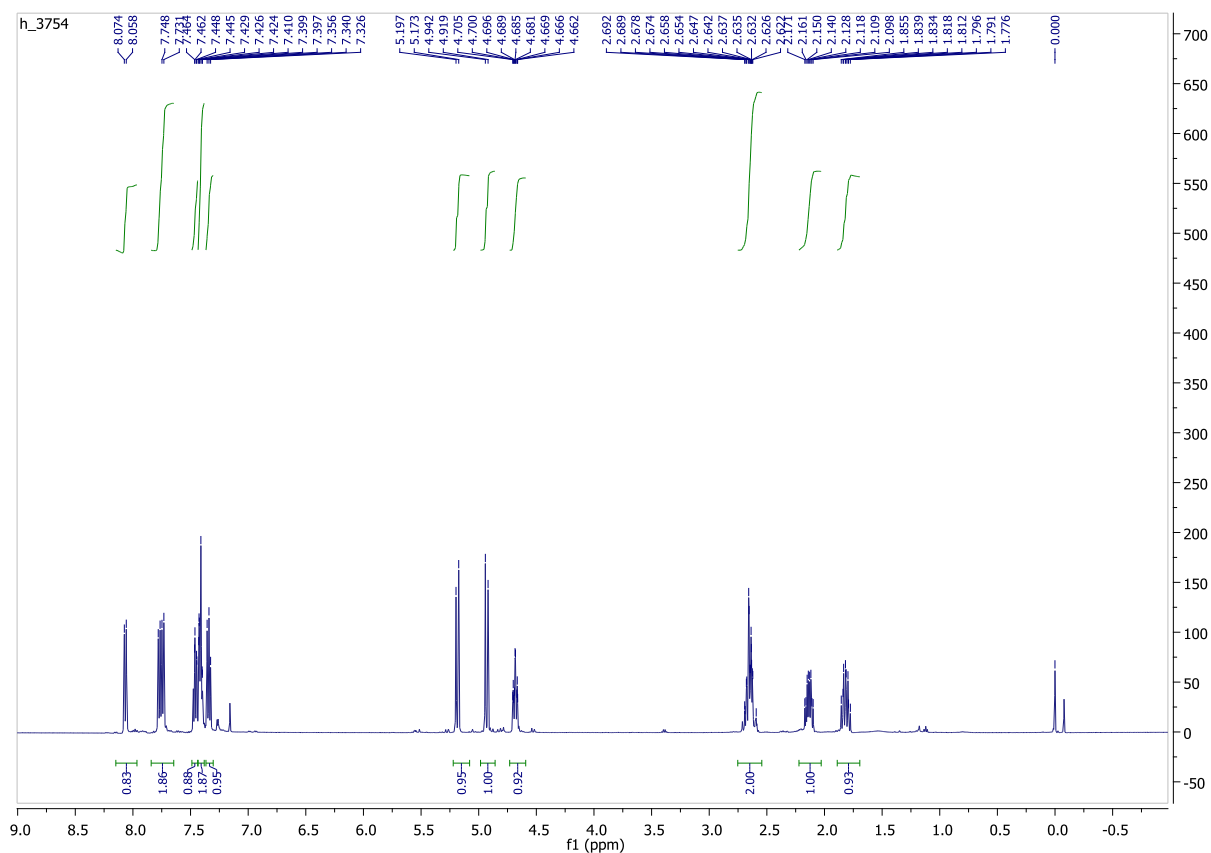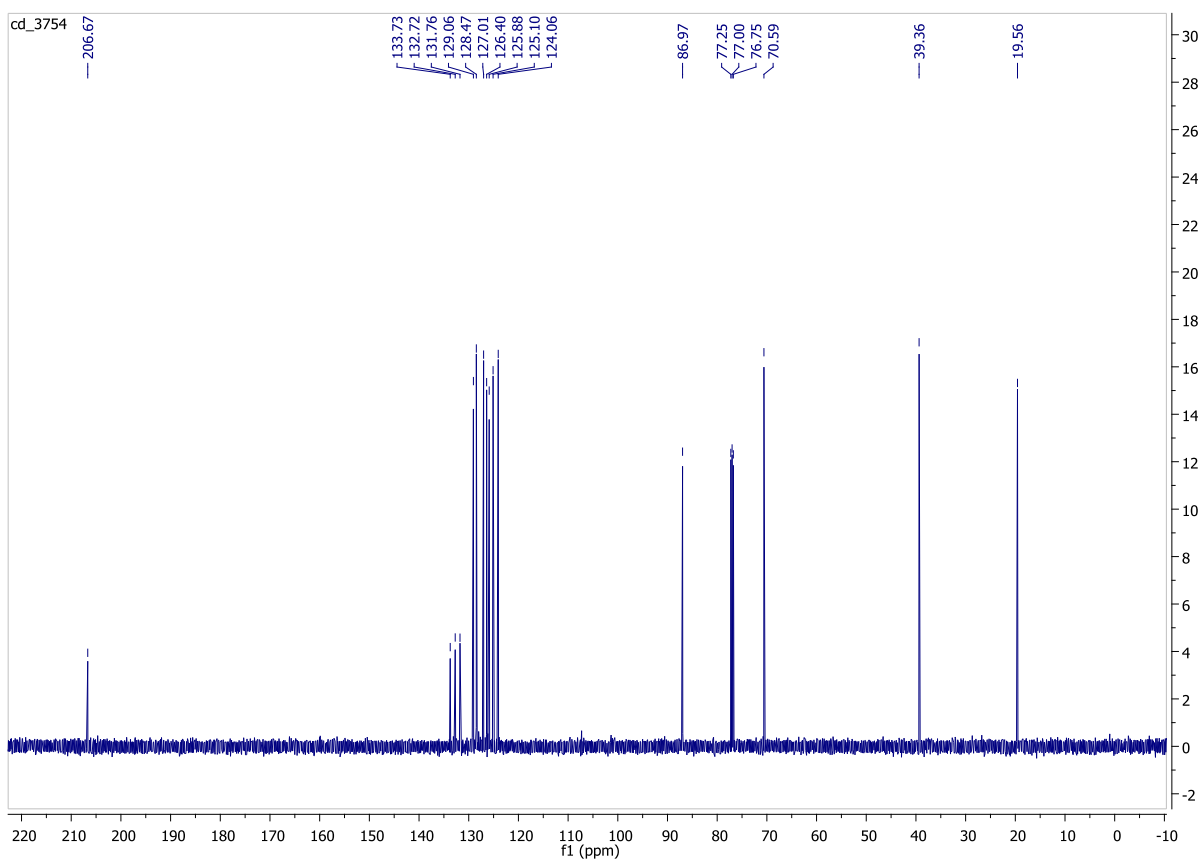

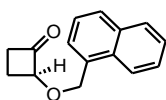

**3s**     **2-(Naphthalen-1-ylmethoxy)-cyclobutanone**

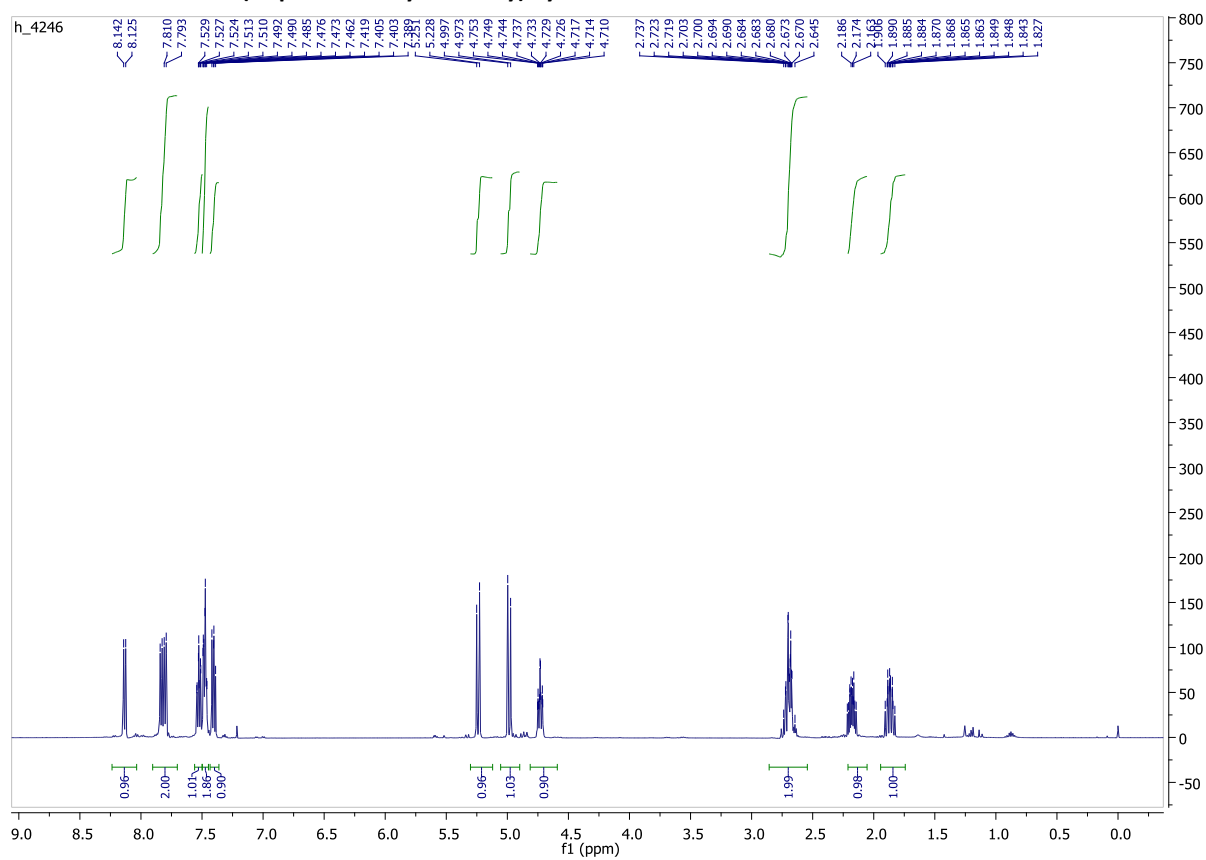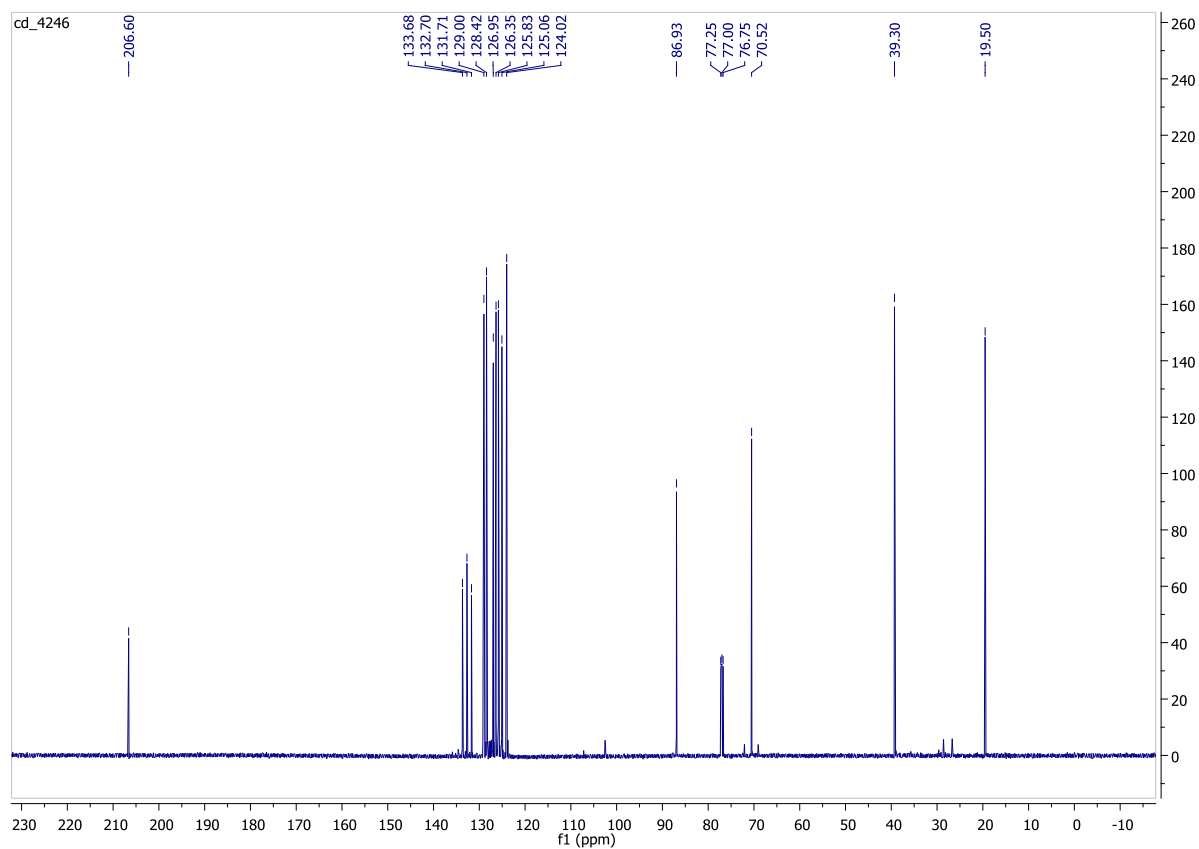

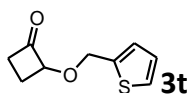

**2-(Thiophen-2-ylmethoxy)-cyclobutanone**

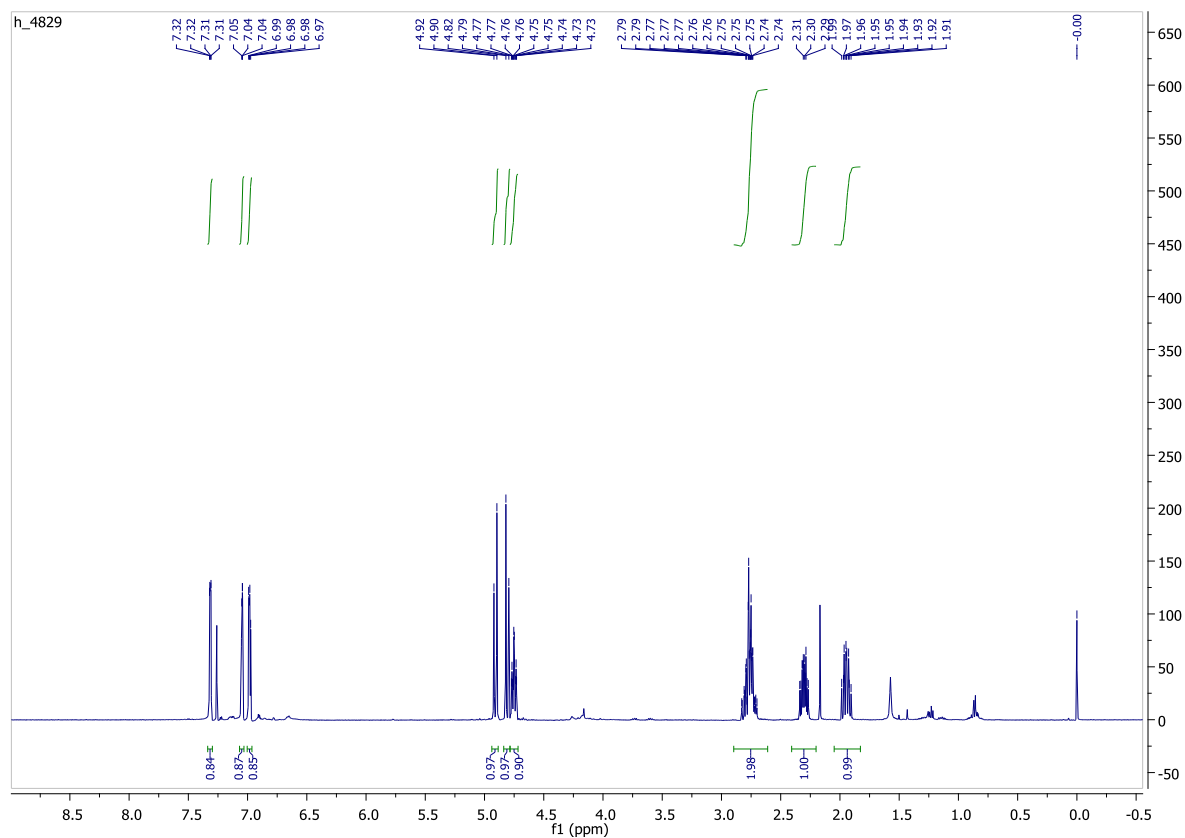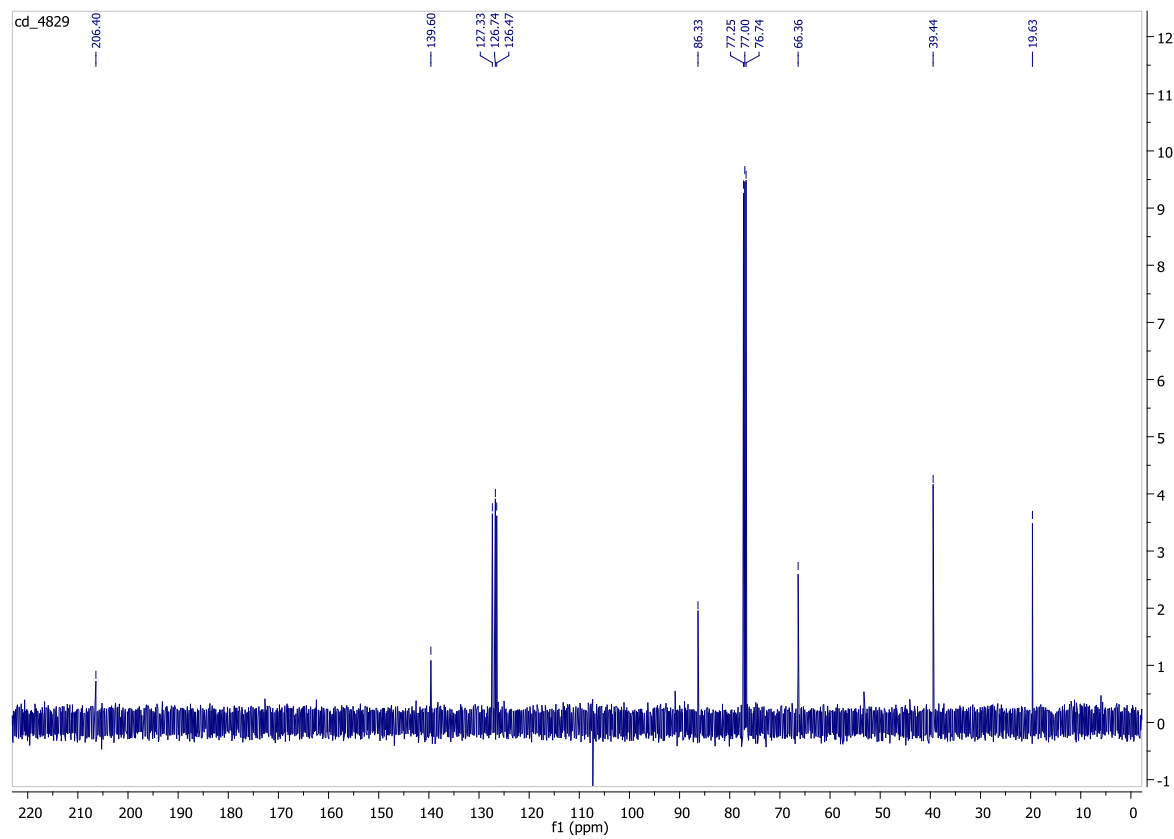

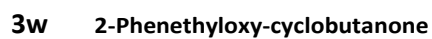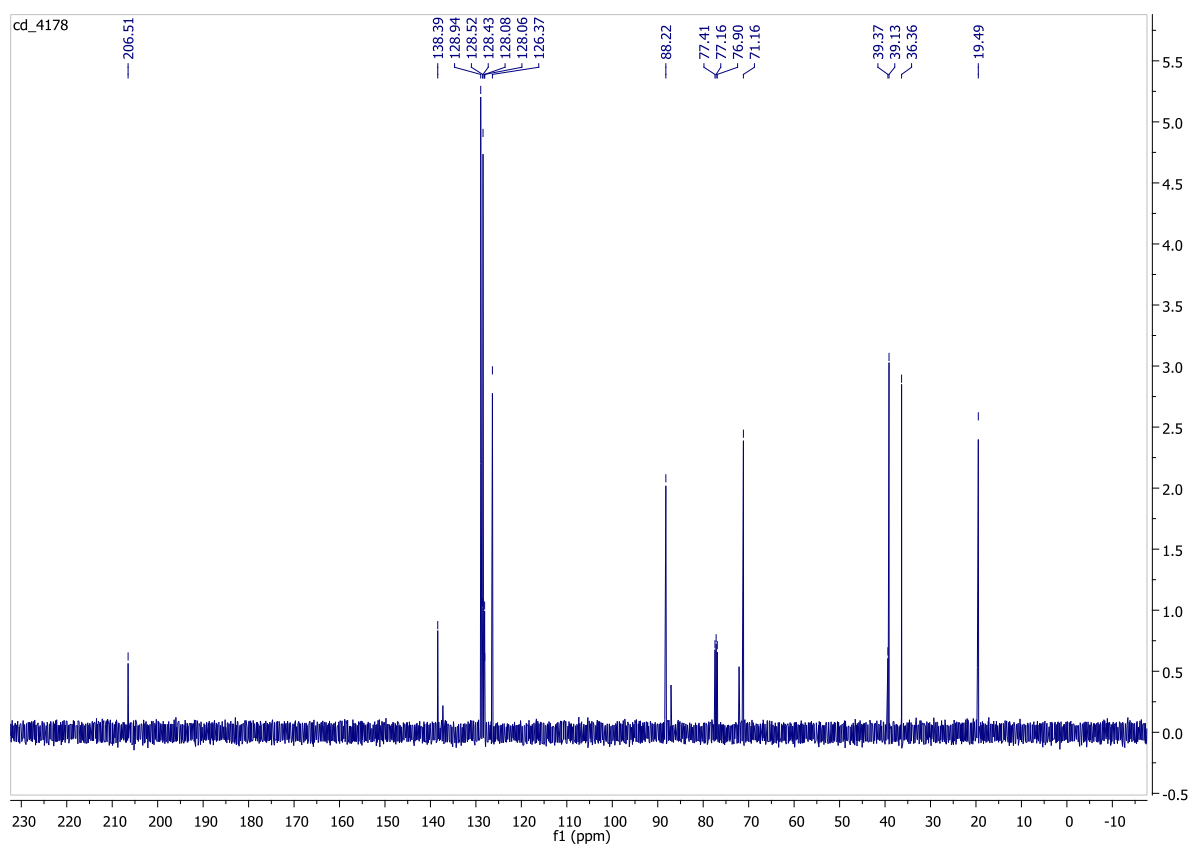



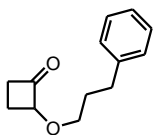

**3x**     **2-(3-Phenyl-propoxy)-cyclobutanone**

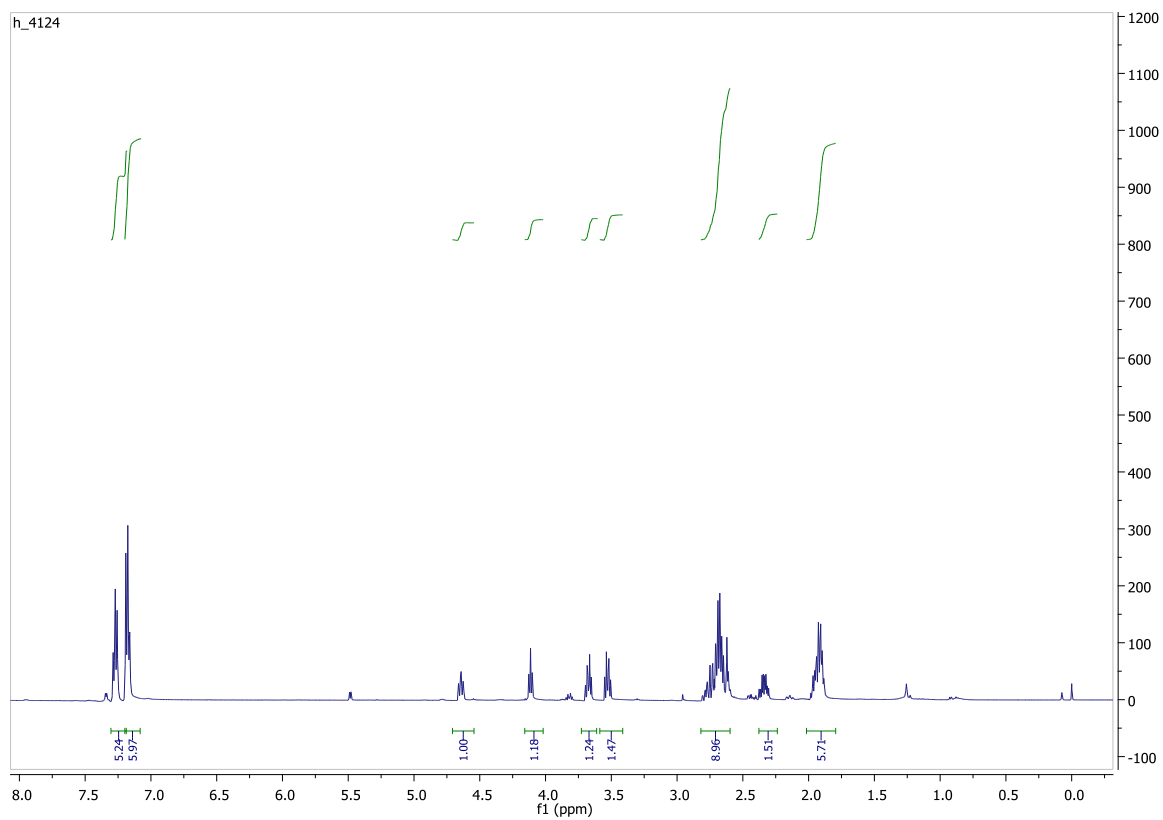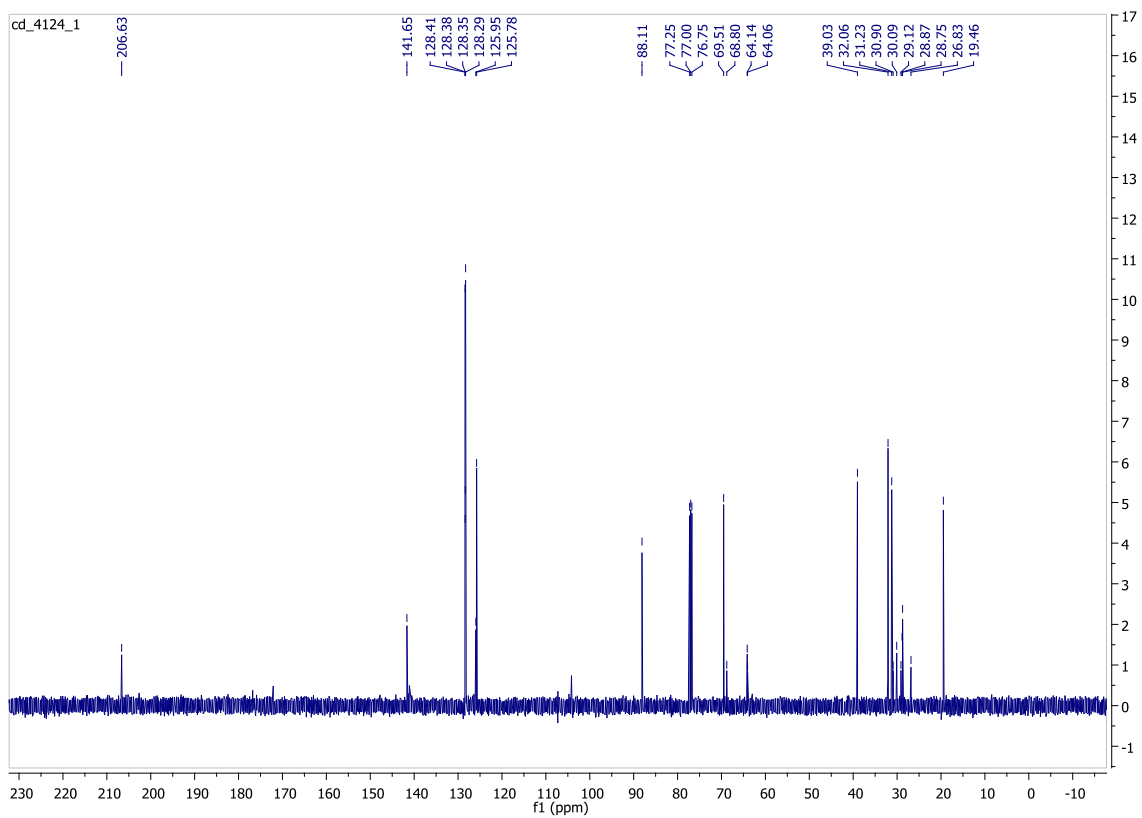

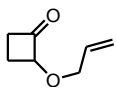

**3y**

**2-Allyloxy-cyclobutanone**

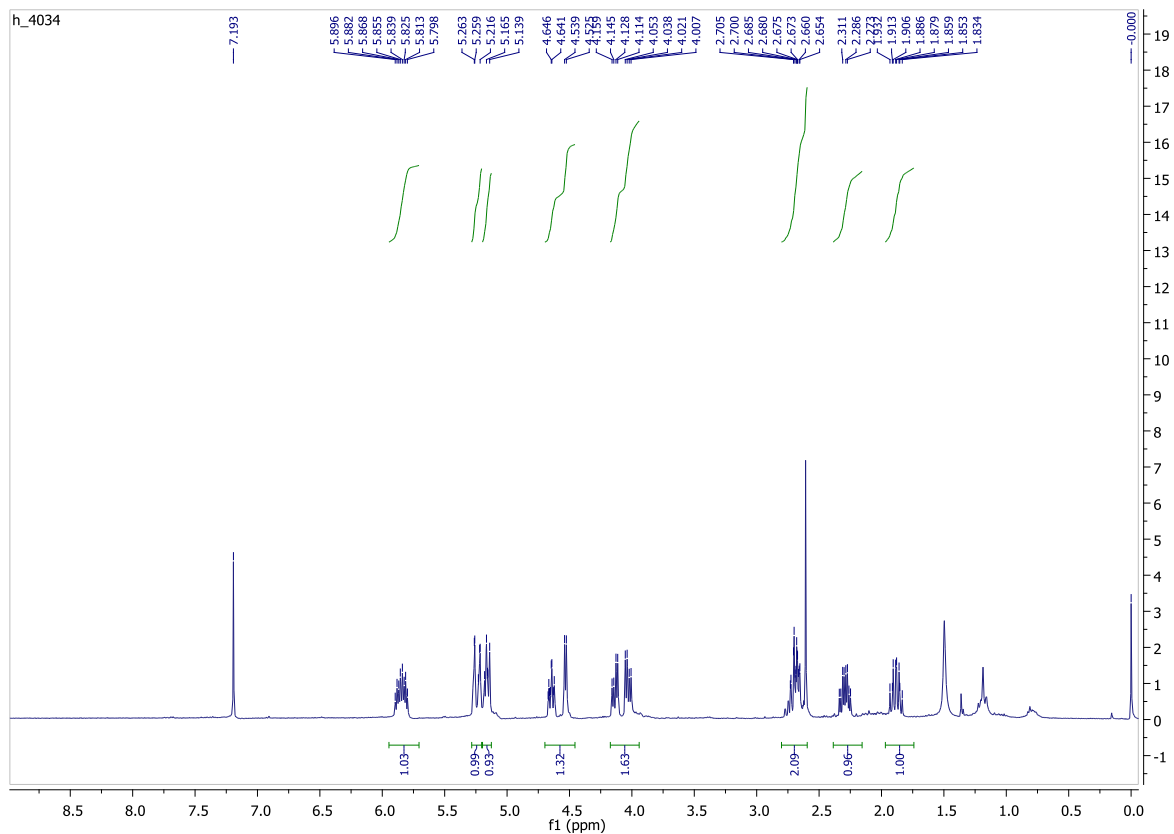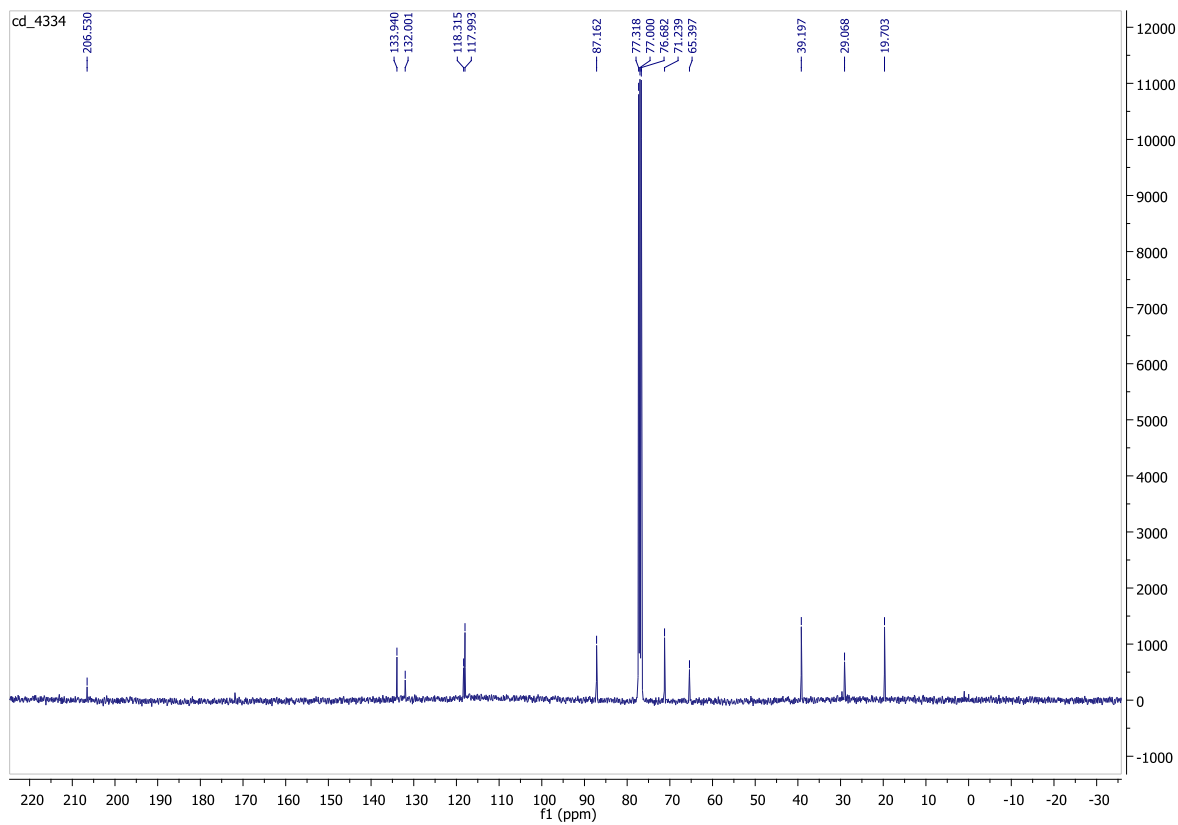

# <sup>1</sup>H and <sup>13</sup>C NMR spectra of compounds 4a,c,d,f,g,h,k,n,s,t,z and 9

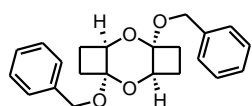

**4a** 1,6-Bis-benzyloxy-2,7-dioxatricyclo[6.2.0.0.3,6]decane

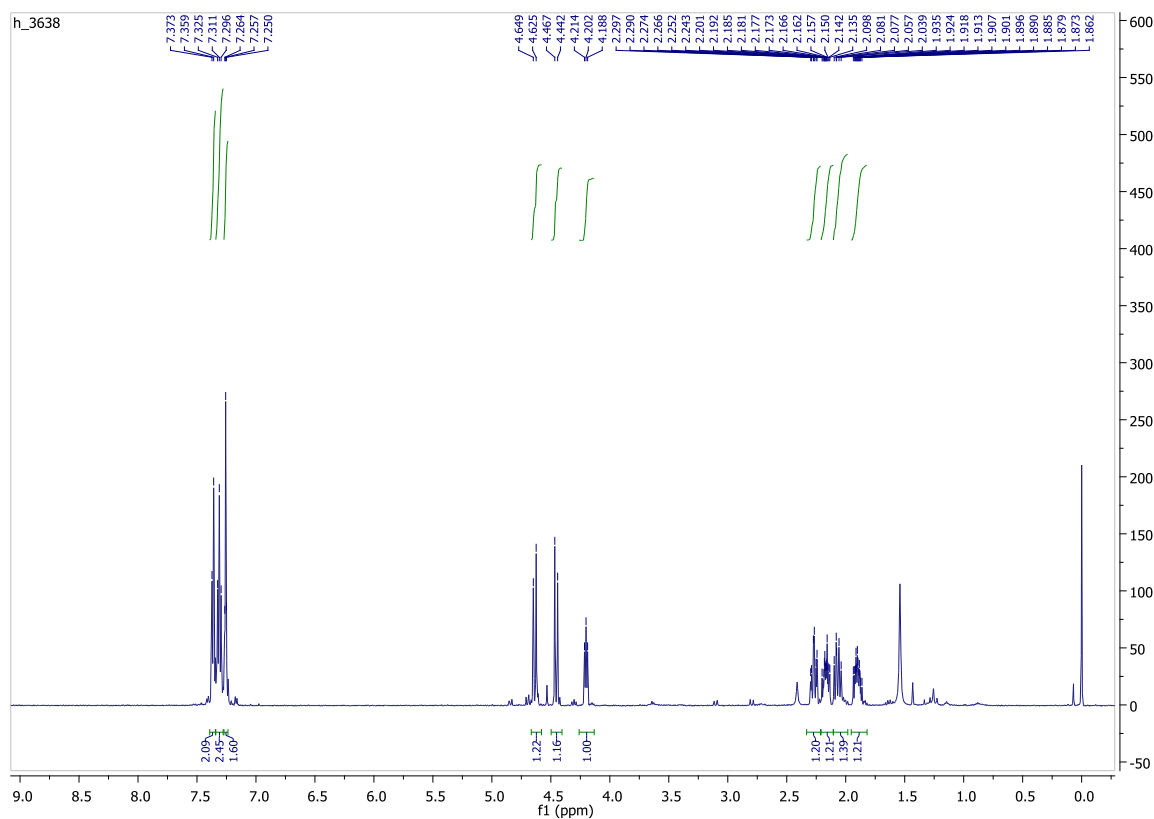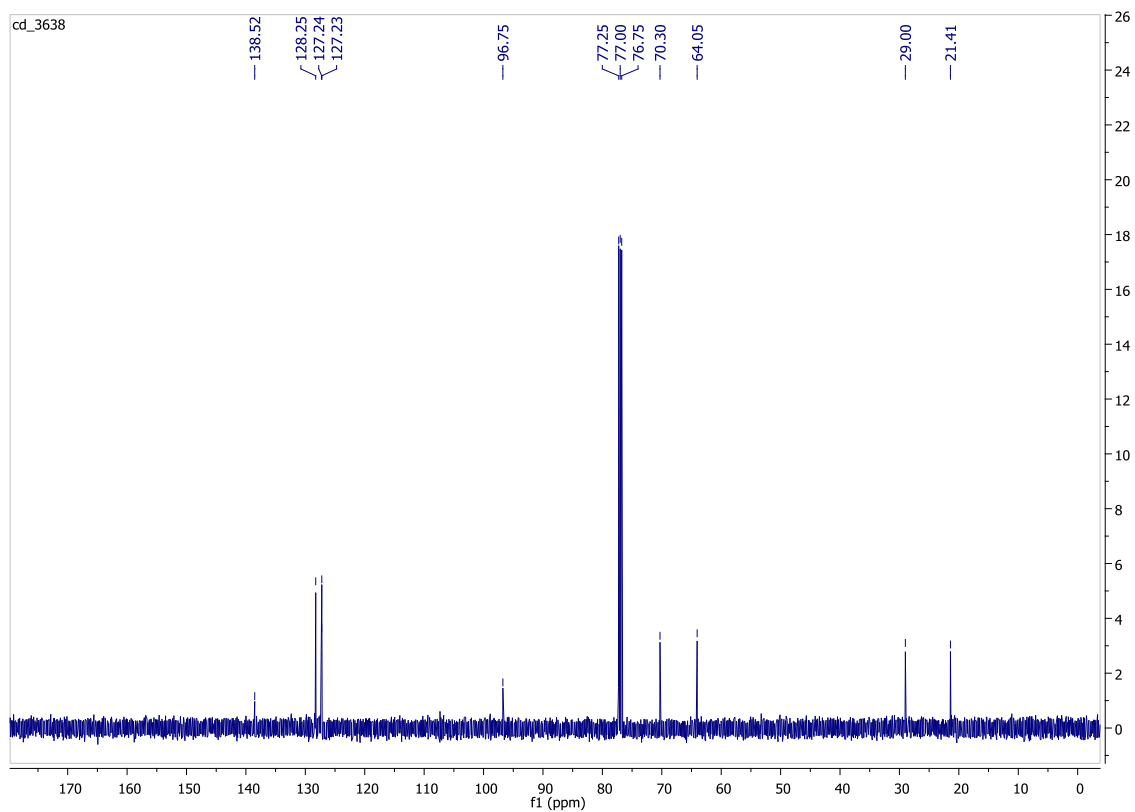

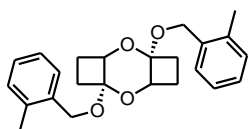

**4c** 1,6-Bis-(2-methylbenzyloxy)-2,7-dioxo-tricyclo[6.2.0.0.3,6]decane

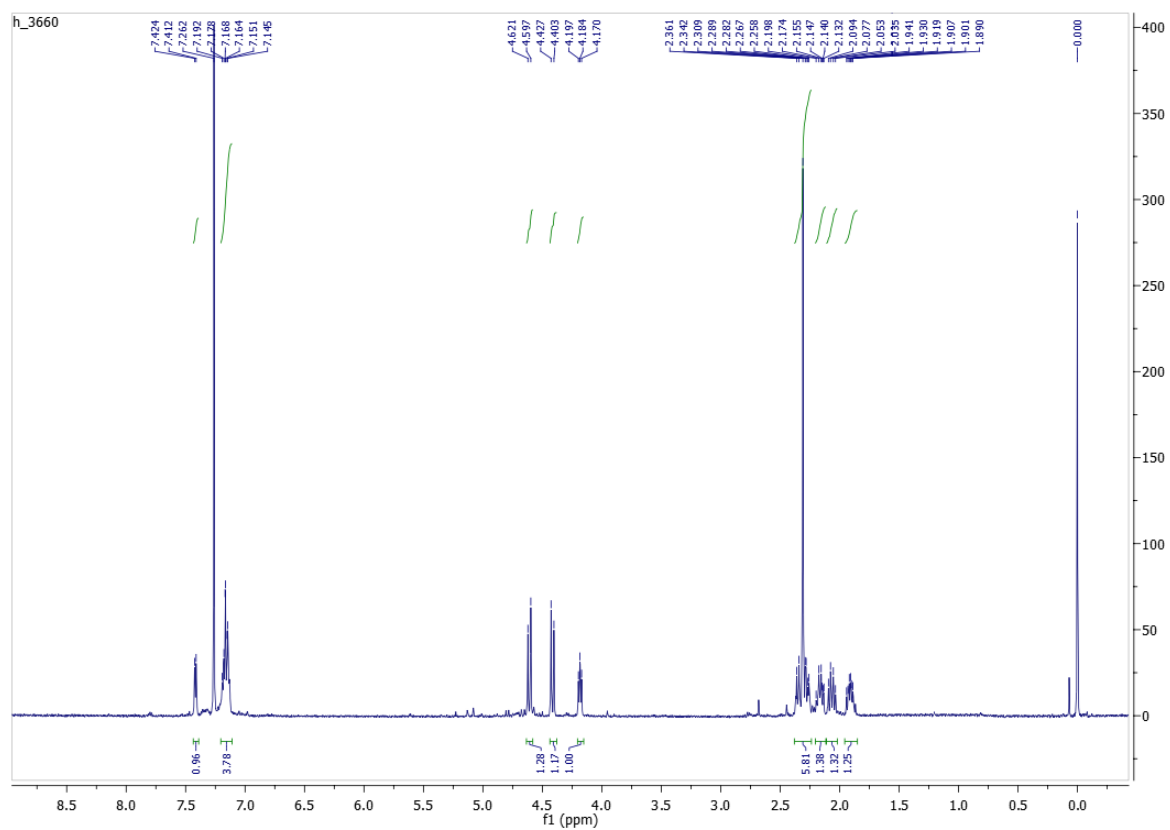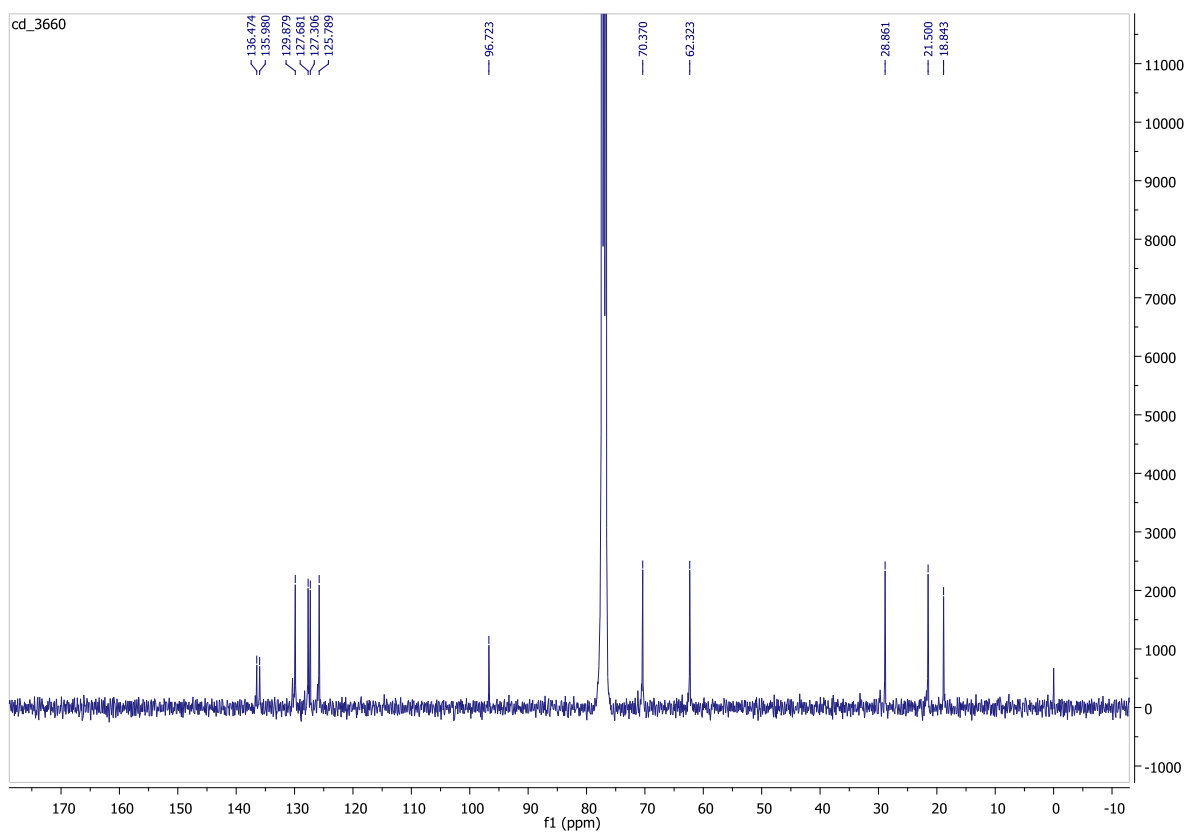

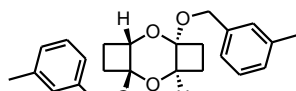

**4d**

**1,6-Bis-(3-methylbenzyloxy)-2,7-dioxatricyclo[6.2.0.0.3,6]decane**

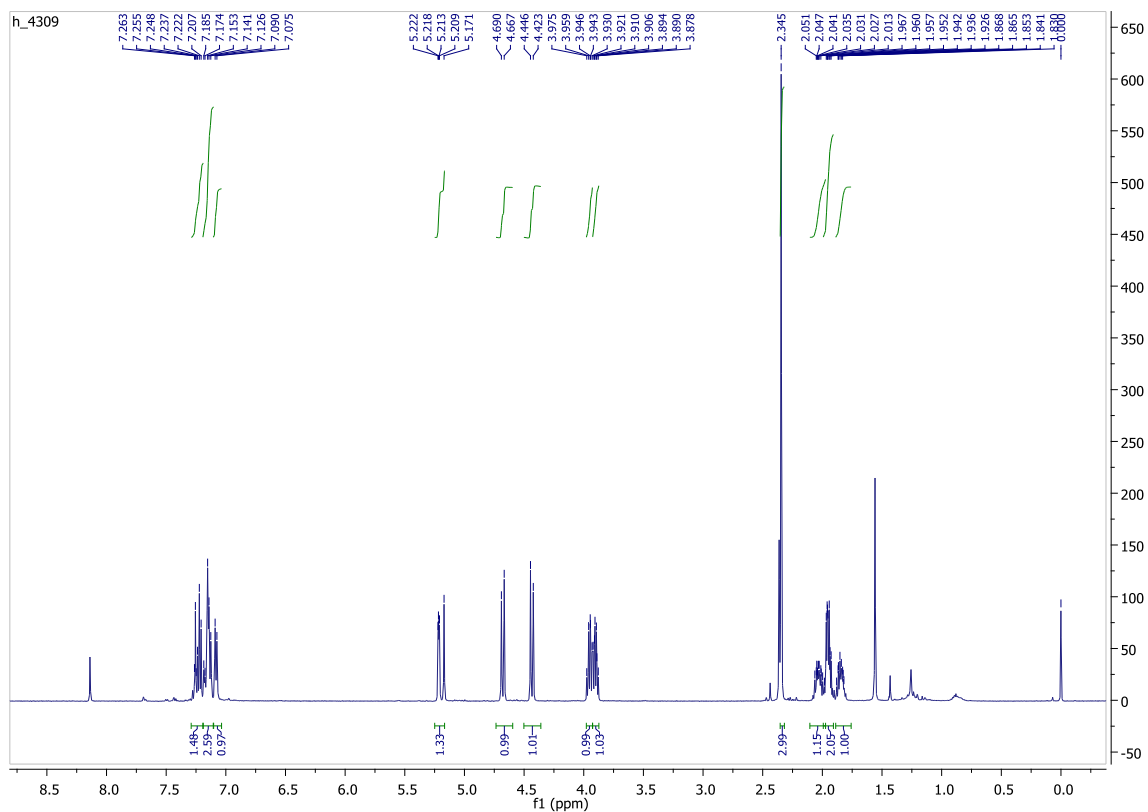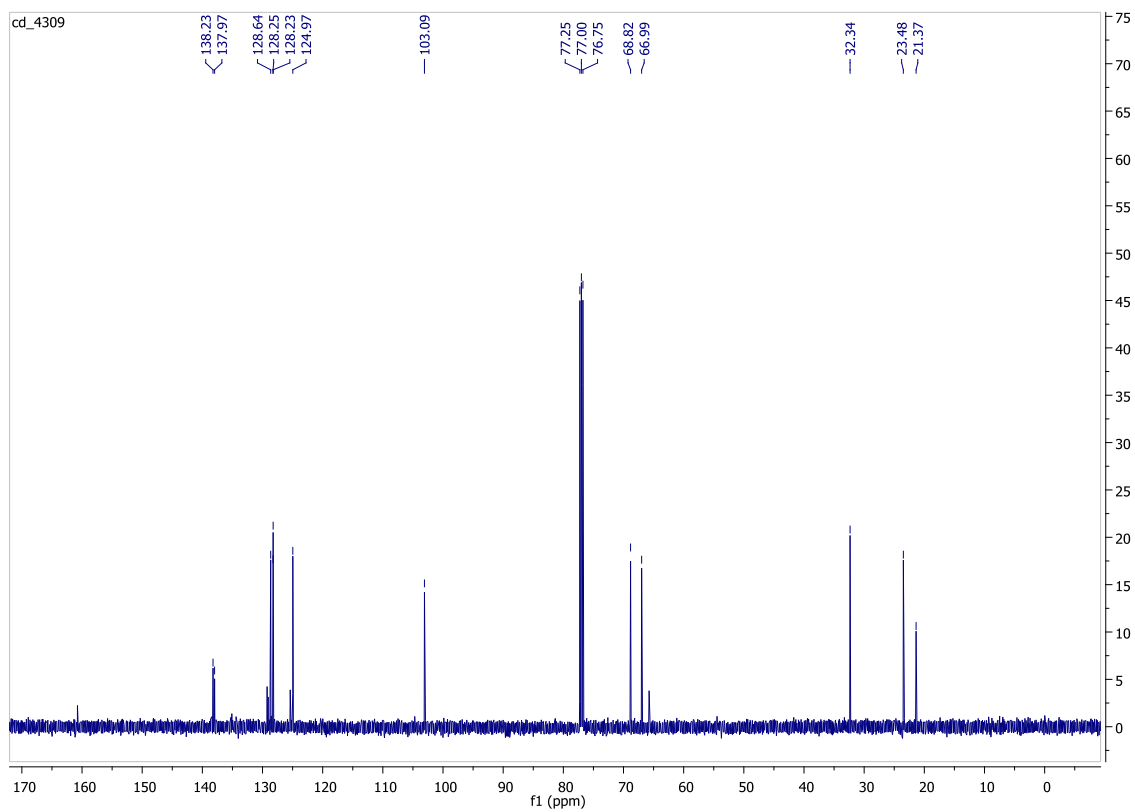

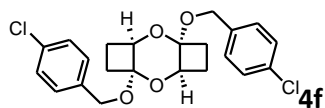

**1,6-Bis-(4-chlorobenzoyloxy)-2,7-dioxatricyclo[6.2.0.0.3,6]decane**

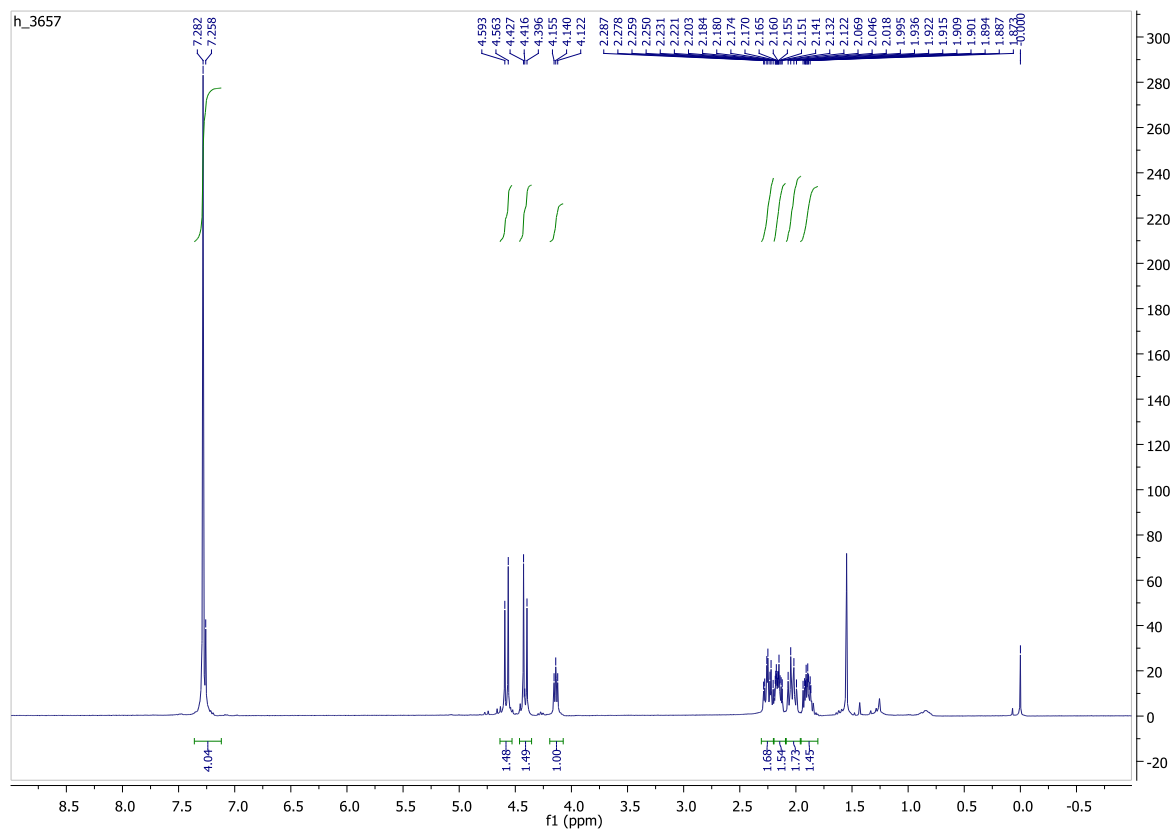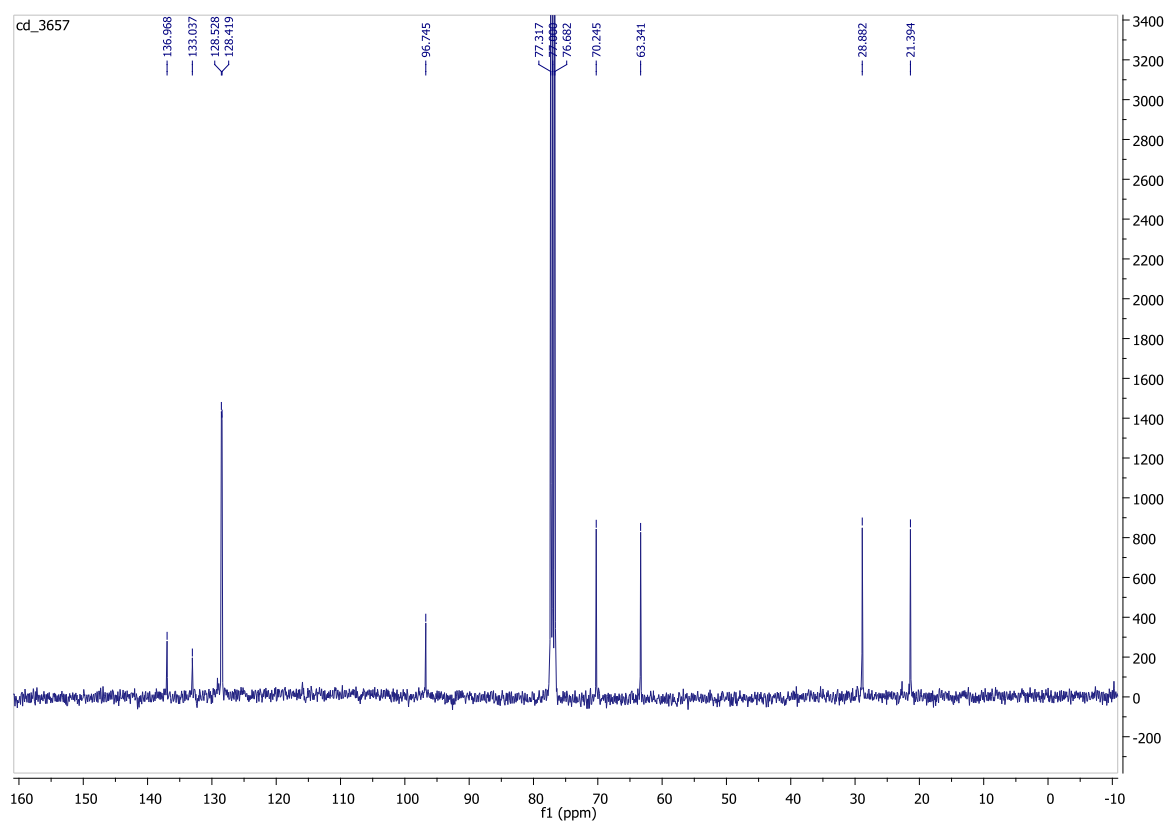

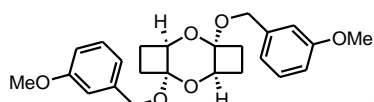

**4h**

**1,6-Bis-(3-methoxybenzyloxy)-2,7-dioxatricyclo[6.2.0.0.3,6]decane**

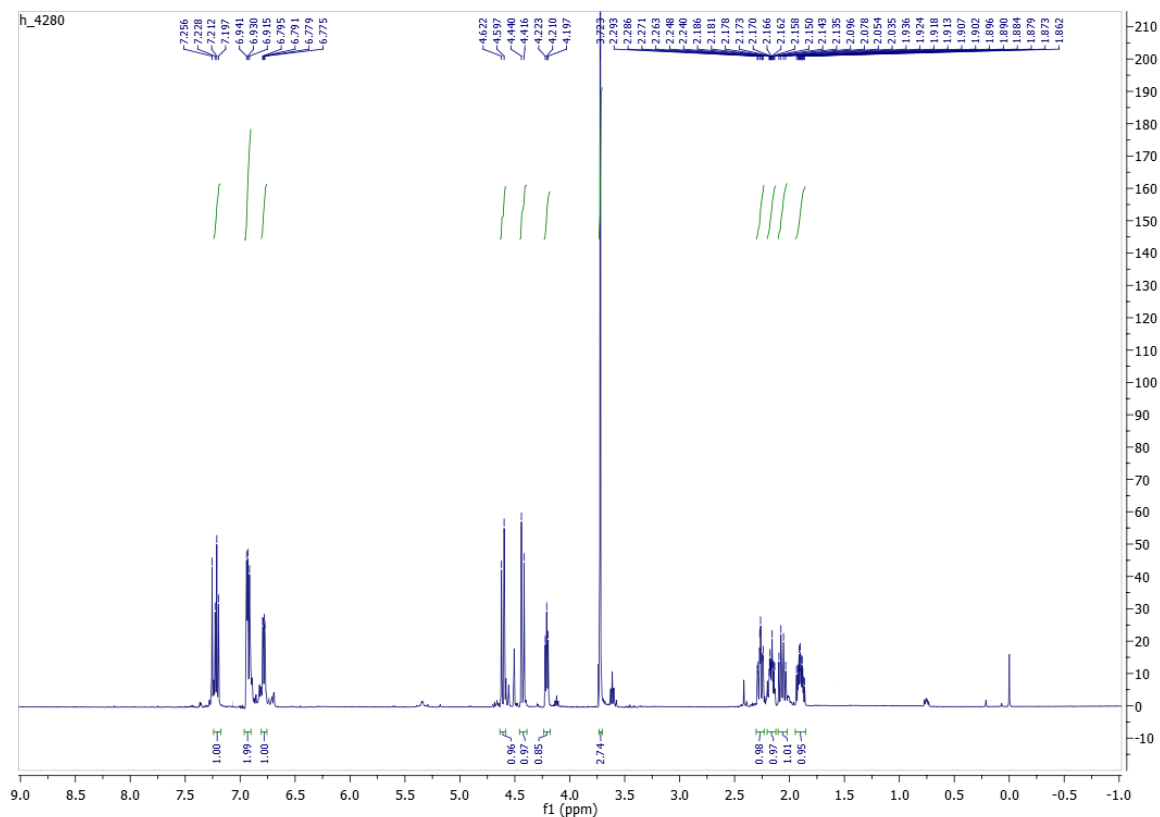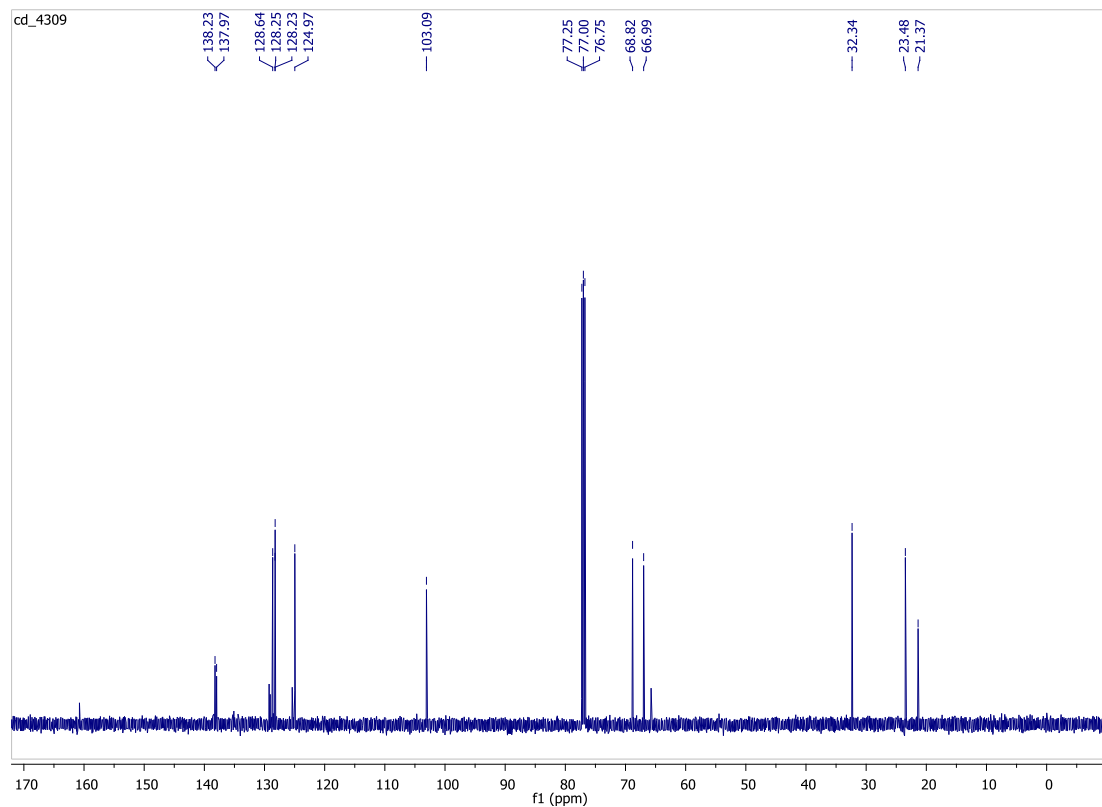

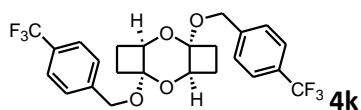

**4k** 1,6-Bis-(4-trifluoromethylbenzyloxy)-2,7-dioxatricyclo[6.2.0.0.3,6]decane

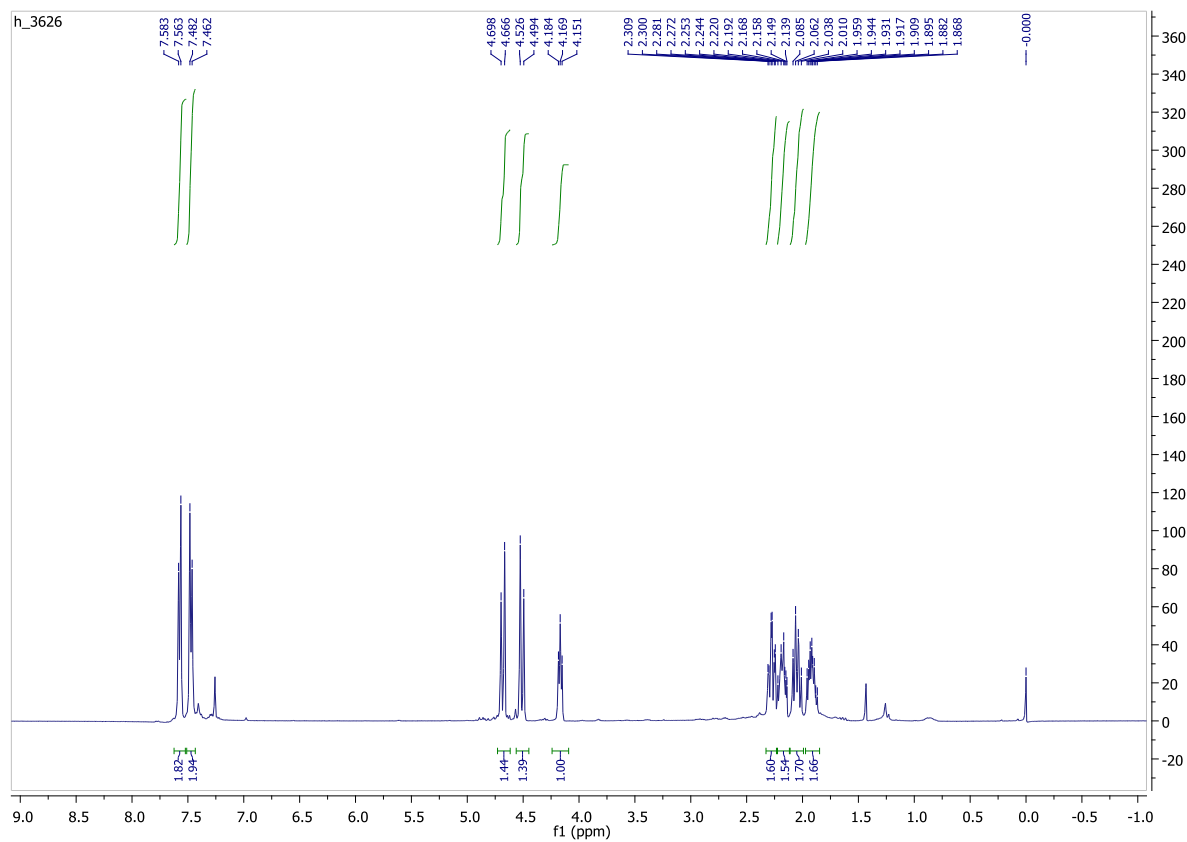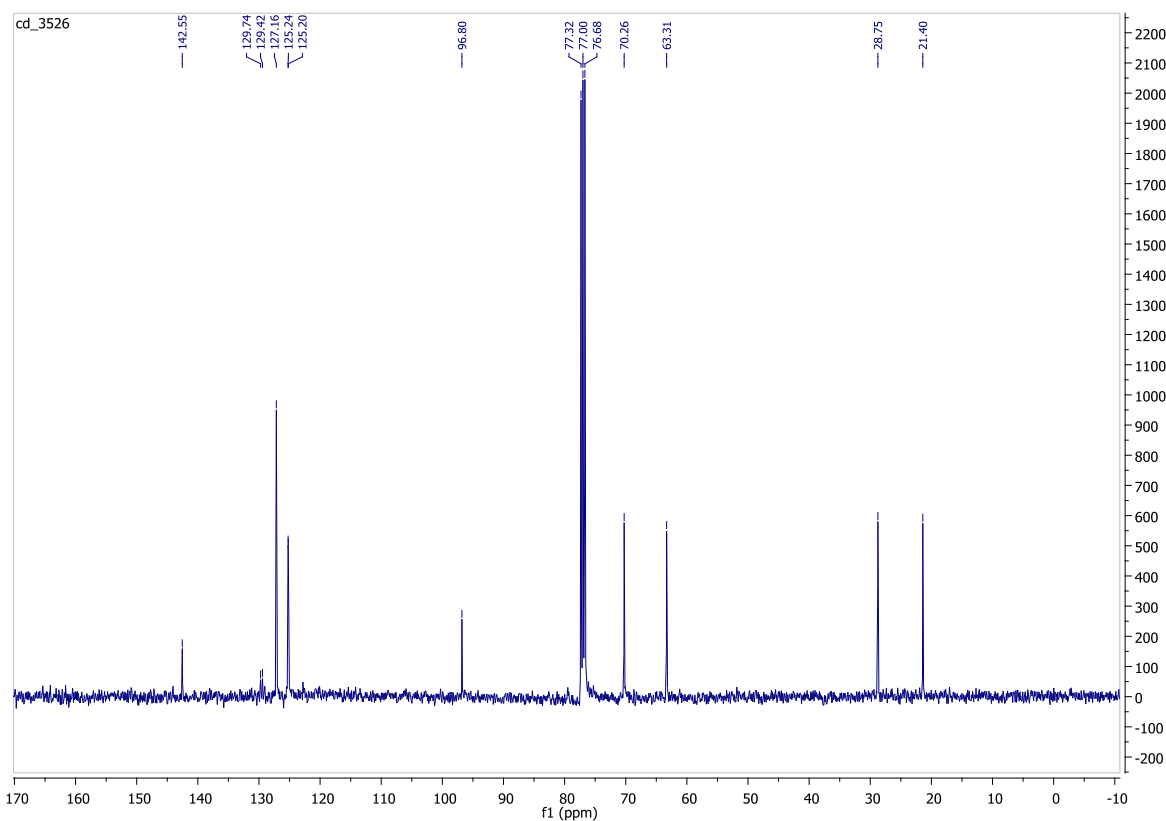



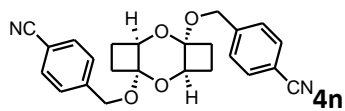

**1,6-Bis-(4-cyanobenzoyloxy)-2,7-dioxatricyclo[6.2.0.0.3,6]decane**

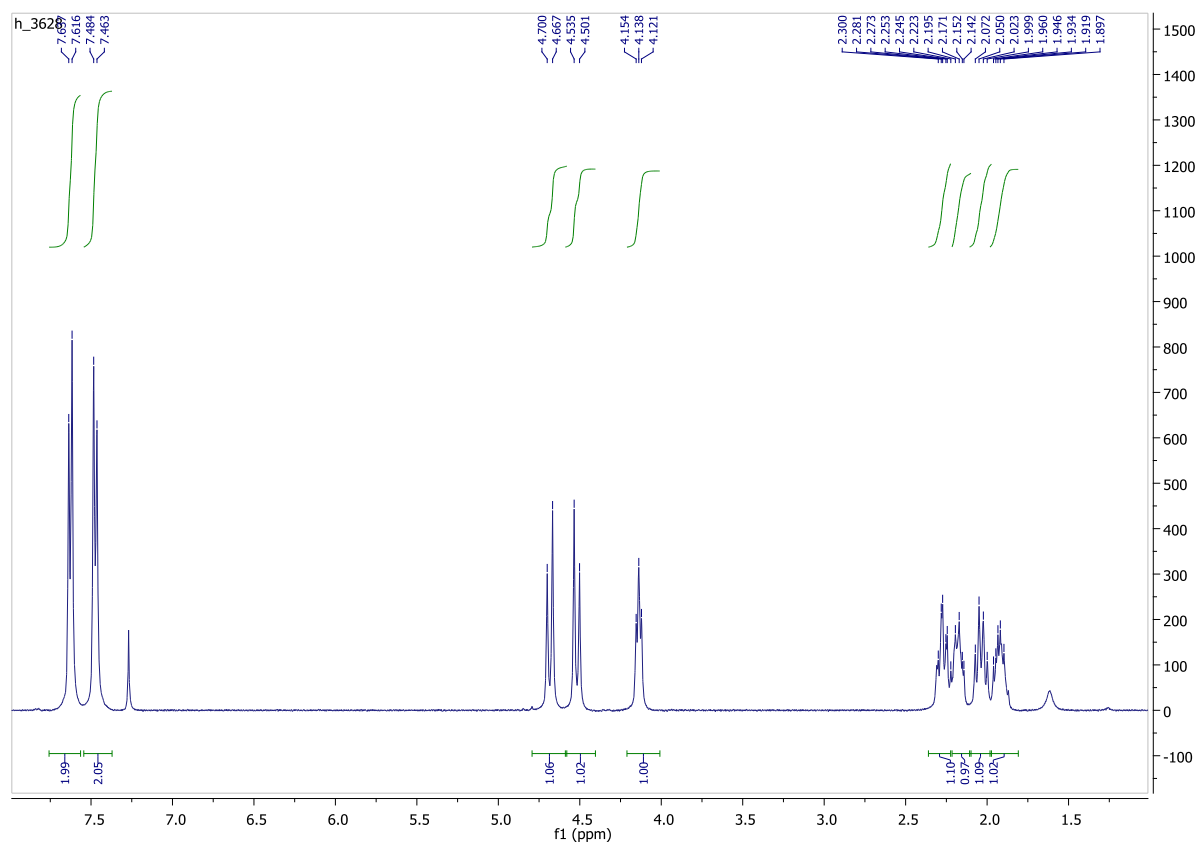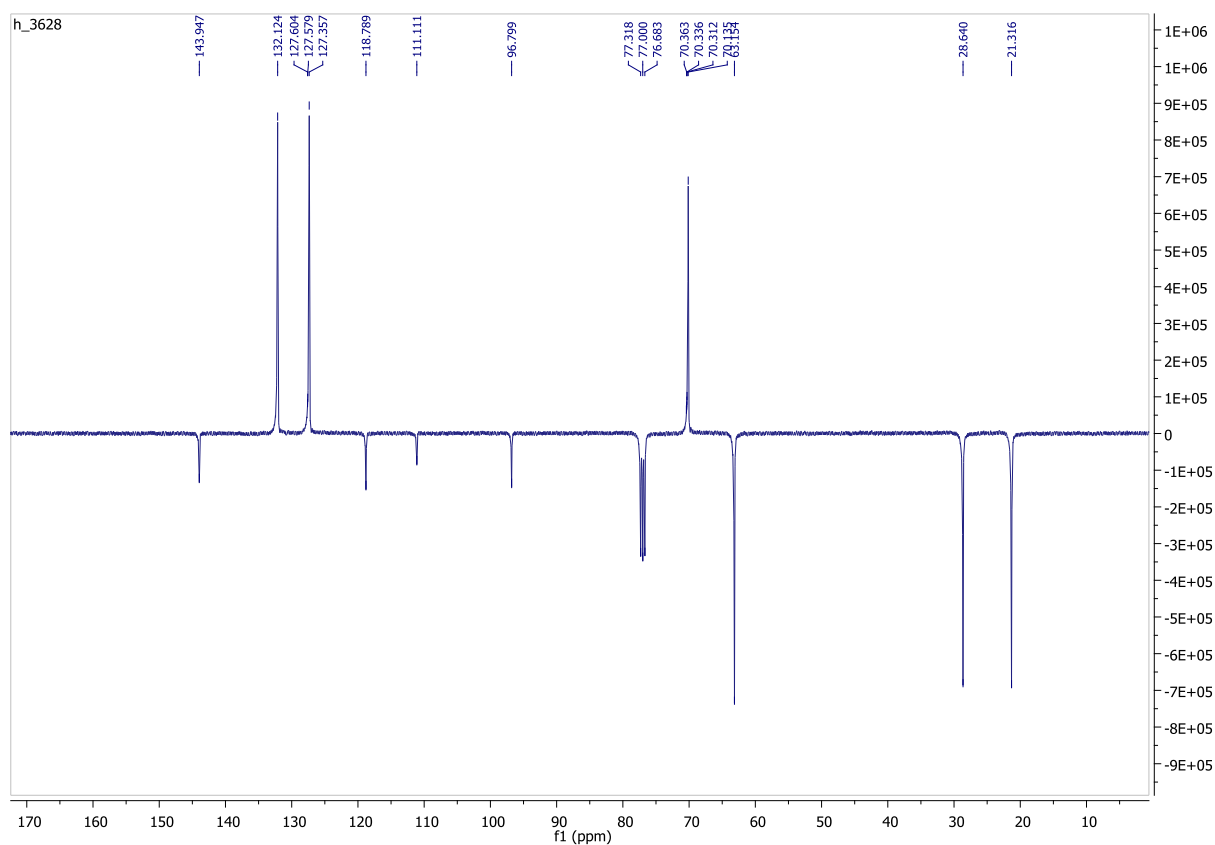

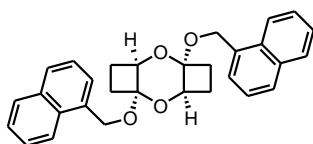

**4s**

**1,6-Bis-(1-naphthylmethoxy-2,7-dioxatricyclo[6.2.0.0.3,6]decane**

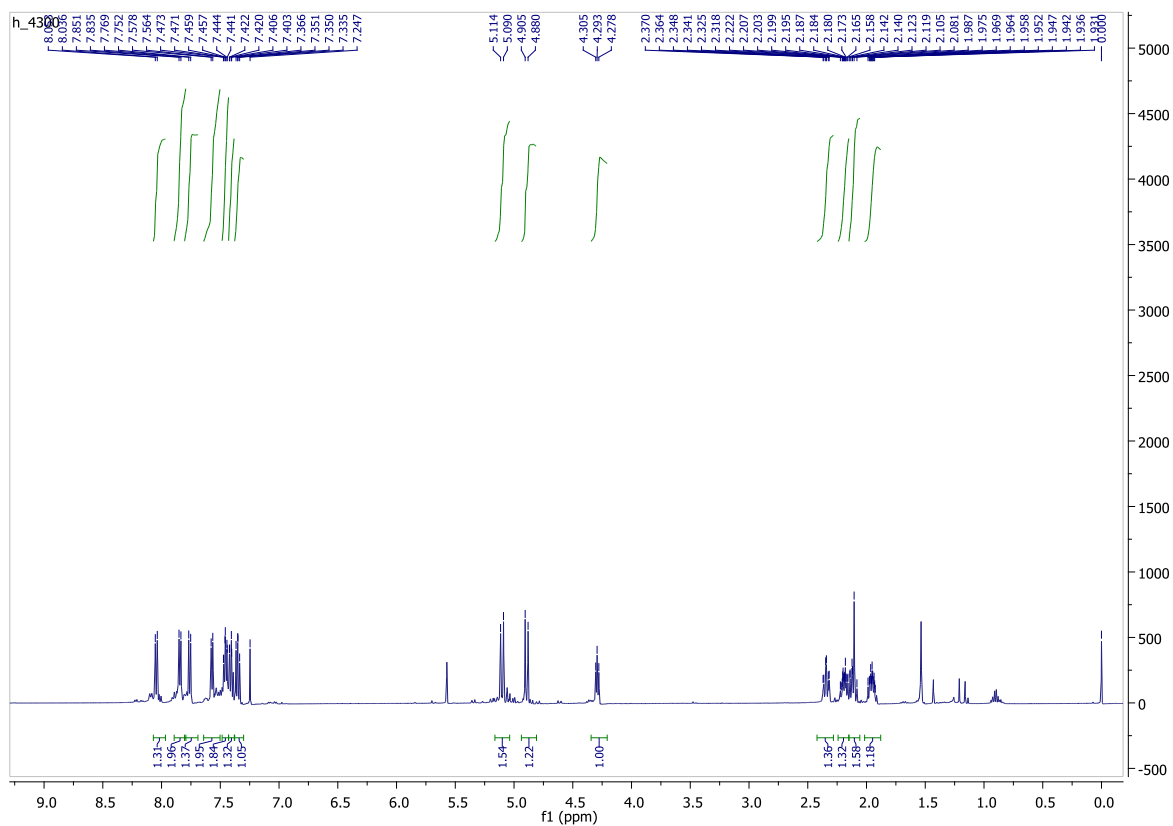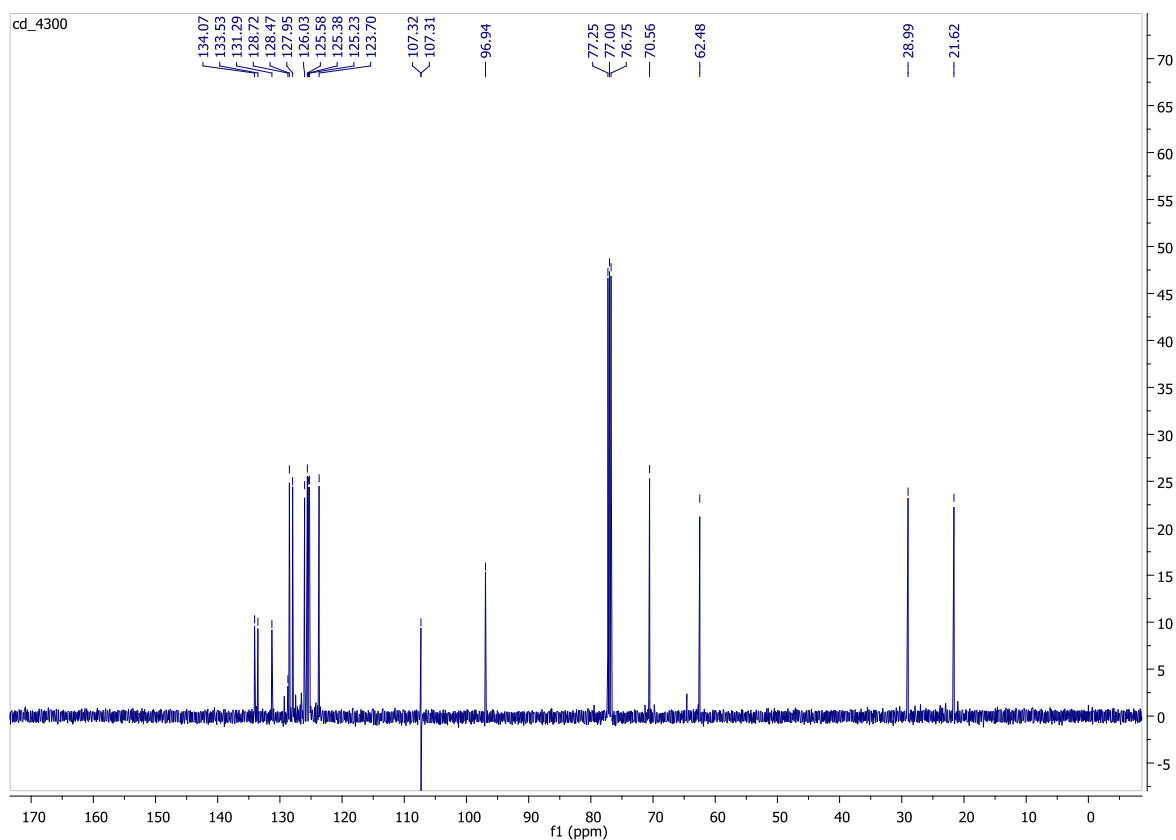

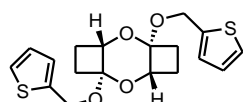

**4t**

**1,6-Bis-(thiophen-2-ylmethoxy)-2,7-dioxatricyclo[6.2.0.0.3,6]decane**

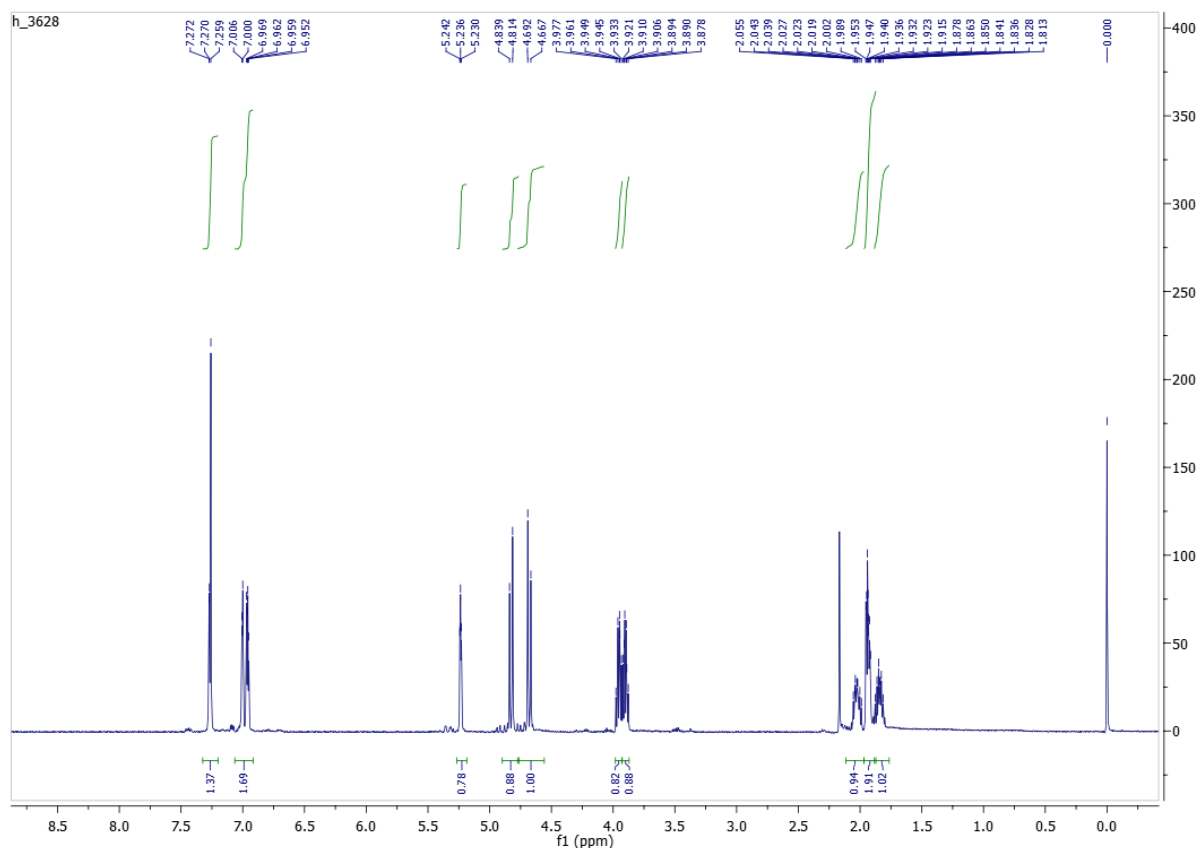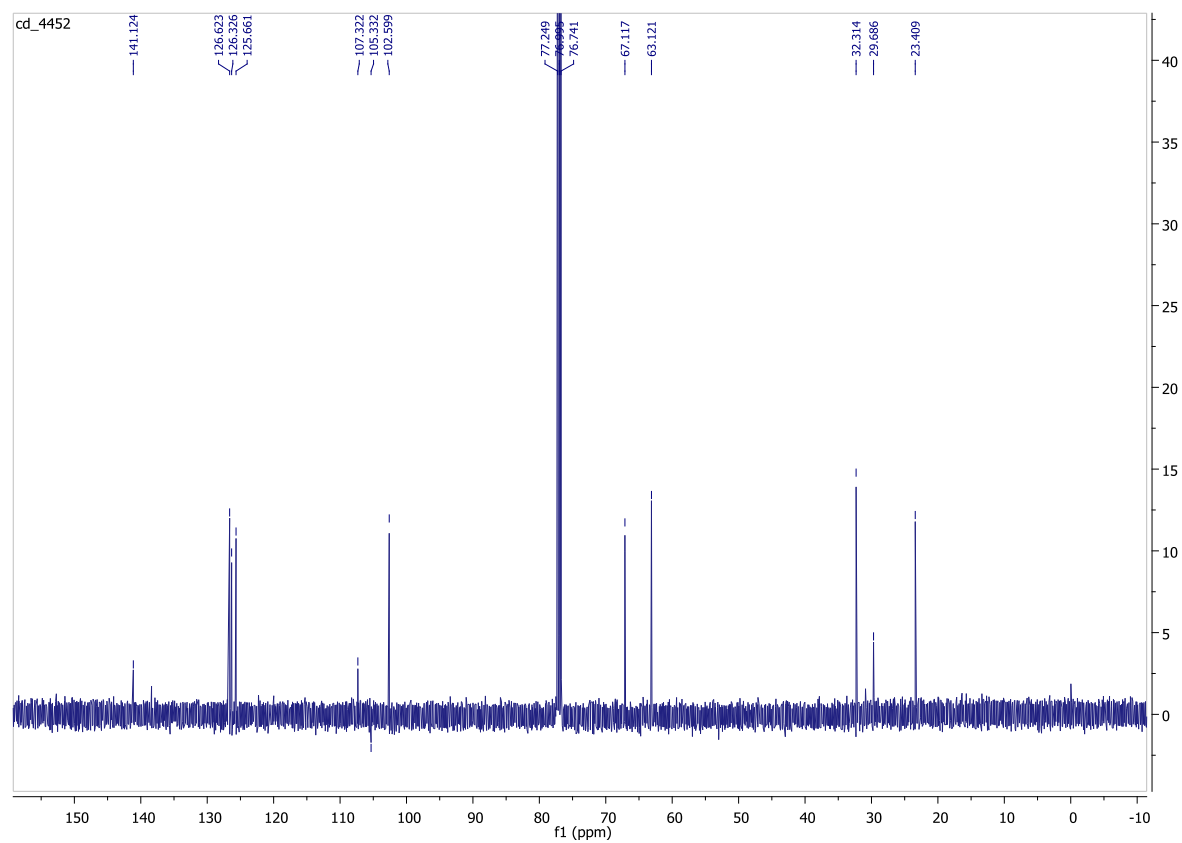

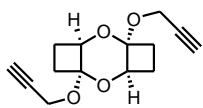

**4z**

**1,6-Bis-propynoxy-2,7-dioxa-tricyclo[6.2.0.03,6]decane**

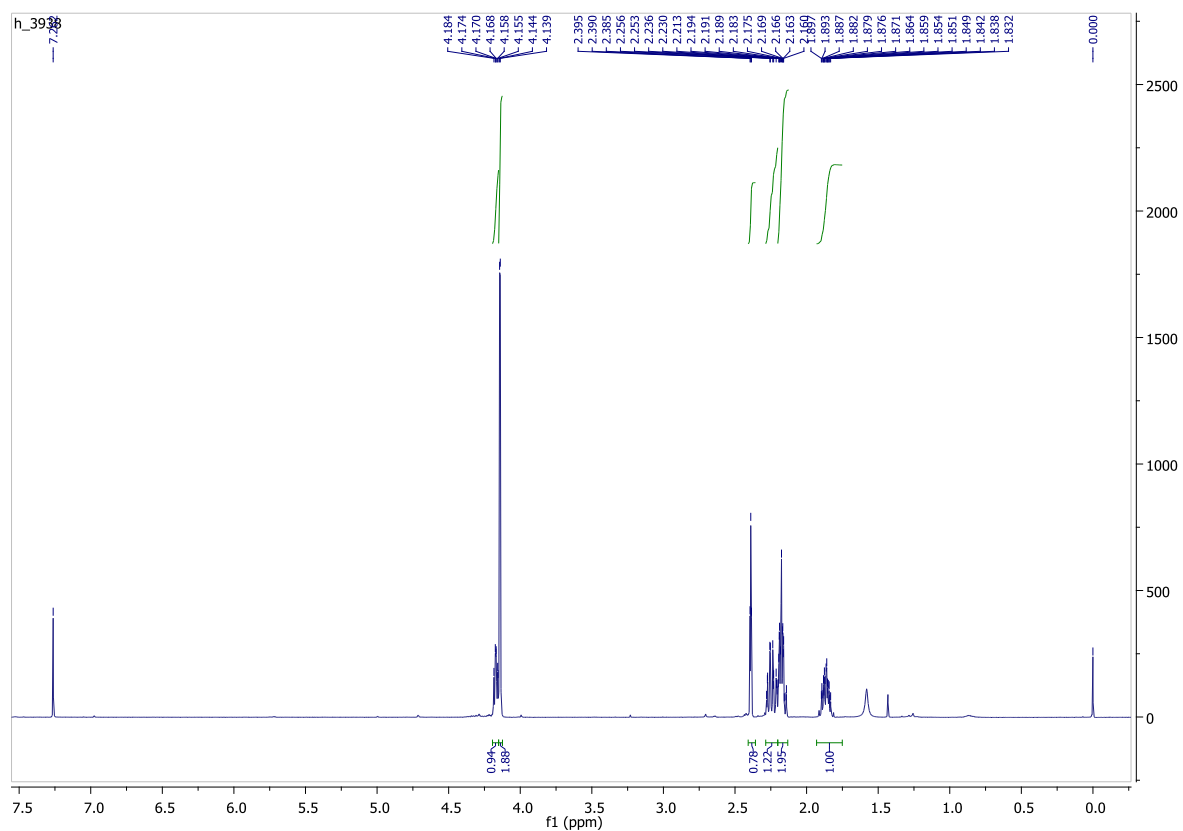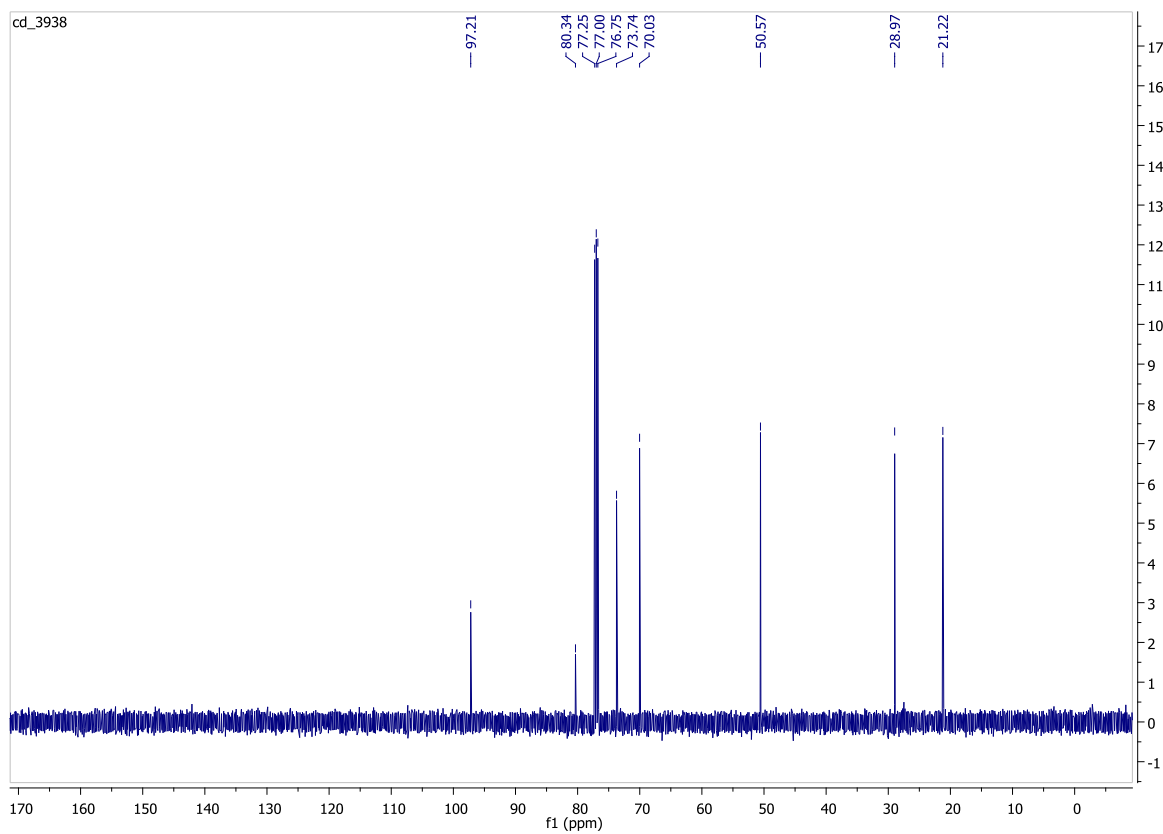

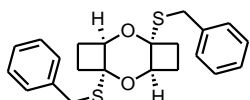

**9**

**1,6-Bis-benzylthio-2,7-dioxatricyclo[6.2.0.0.3,6]decane**

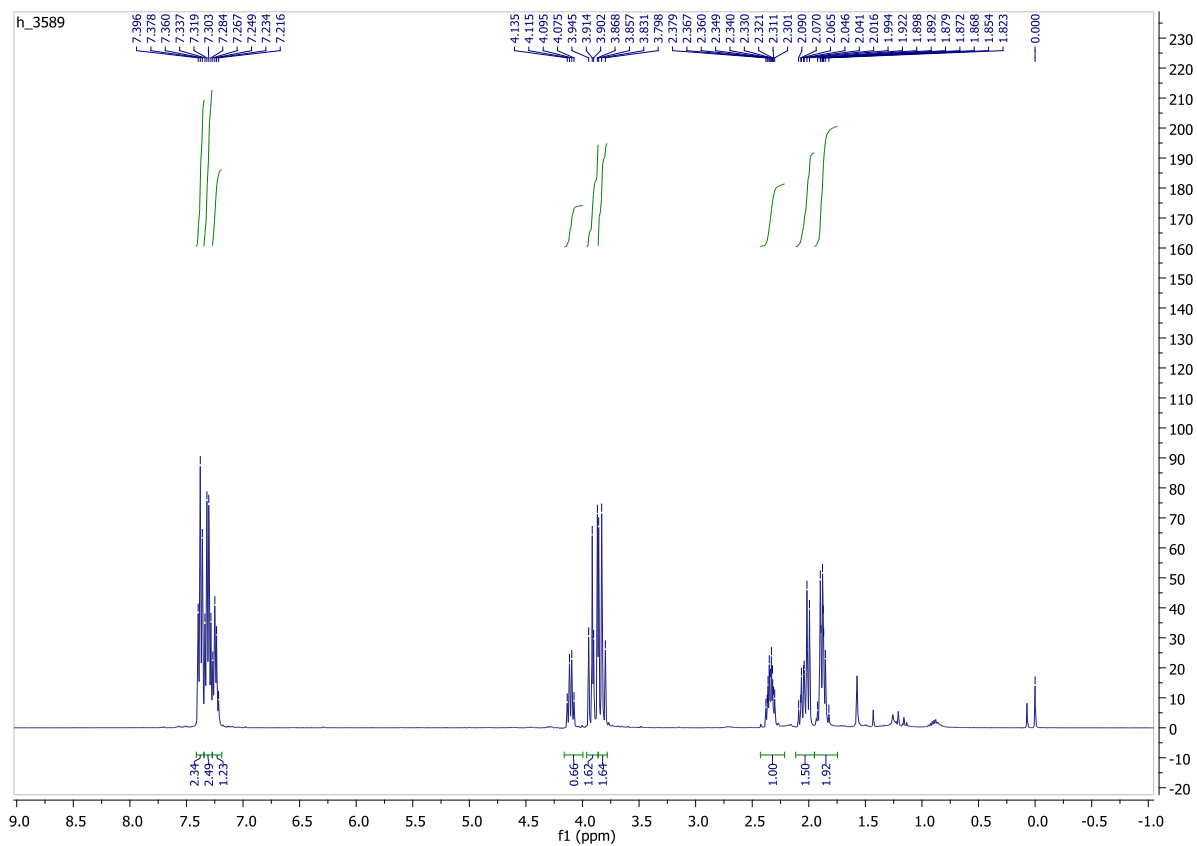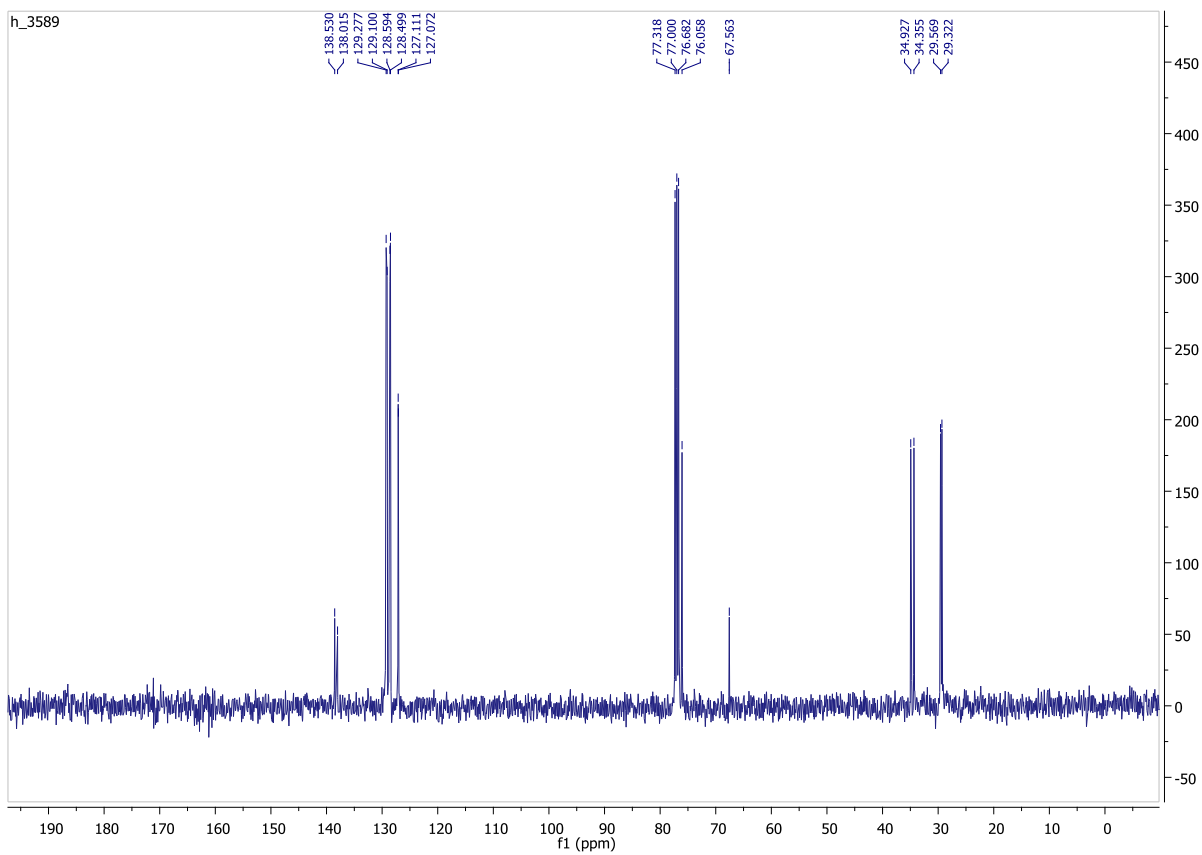

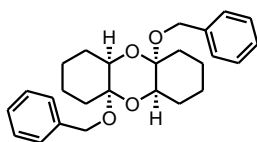

**10** Bis-benzyloxy-dodecahydro-dibenzo[1,4]dioxine

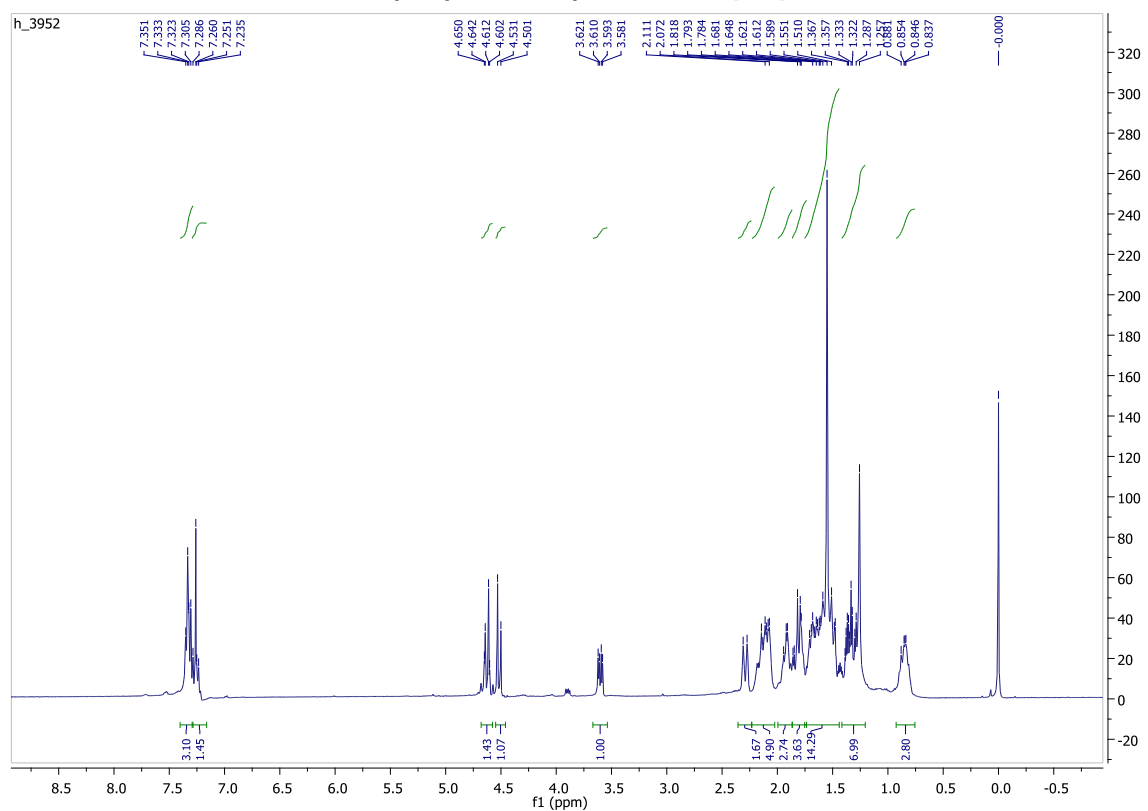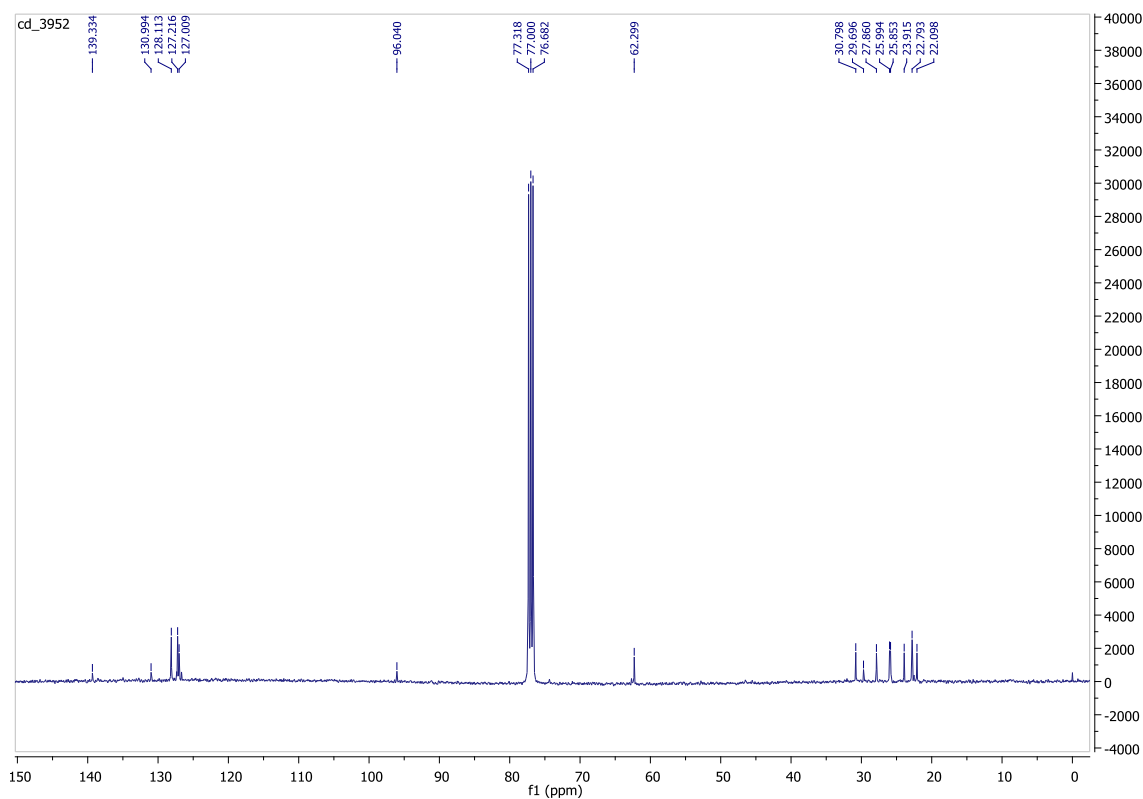

## JMOD of compound 4n

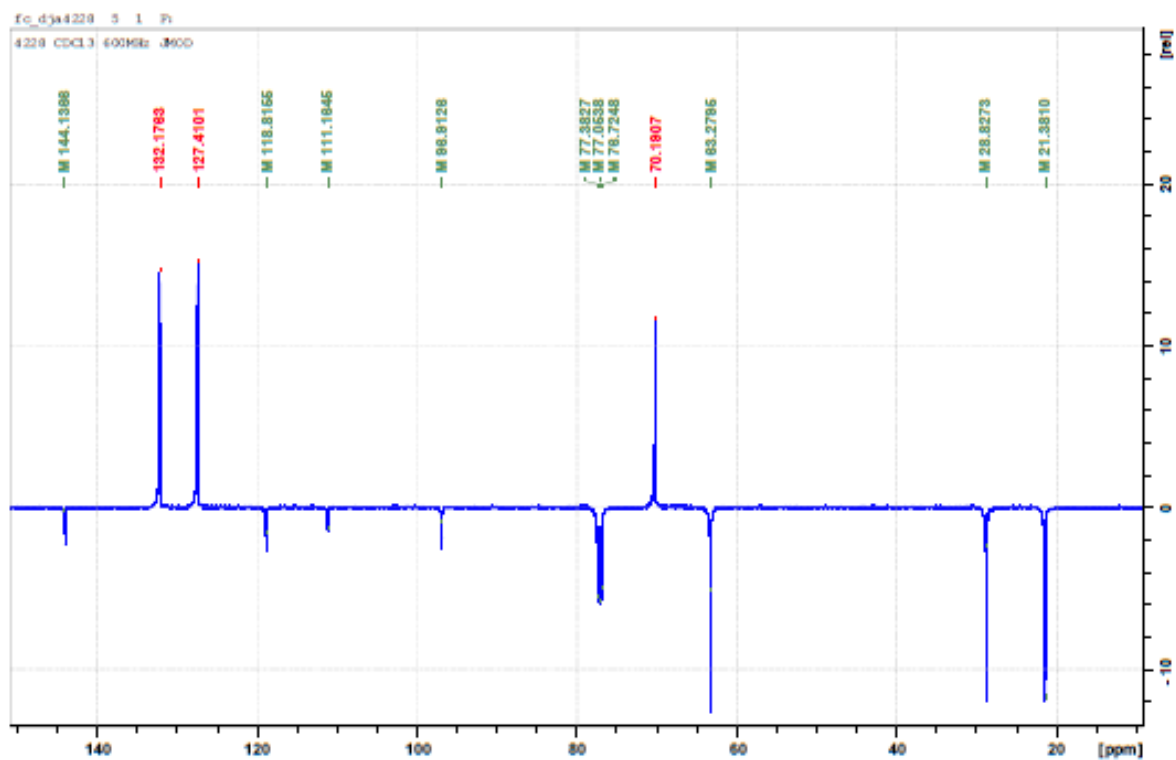

## COSY of compound 4n

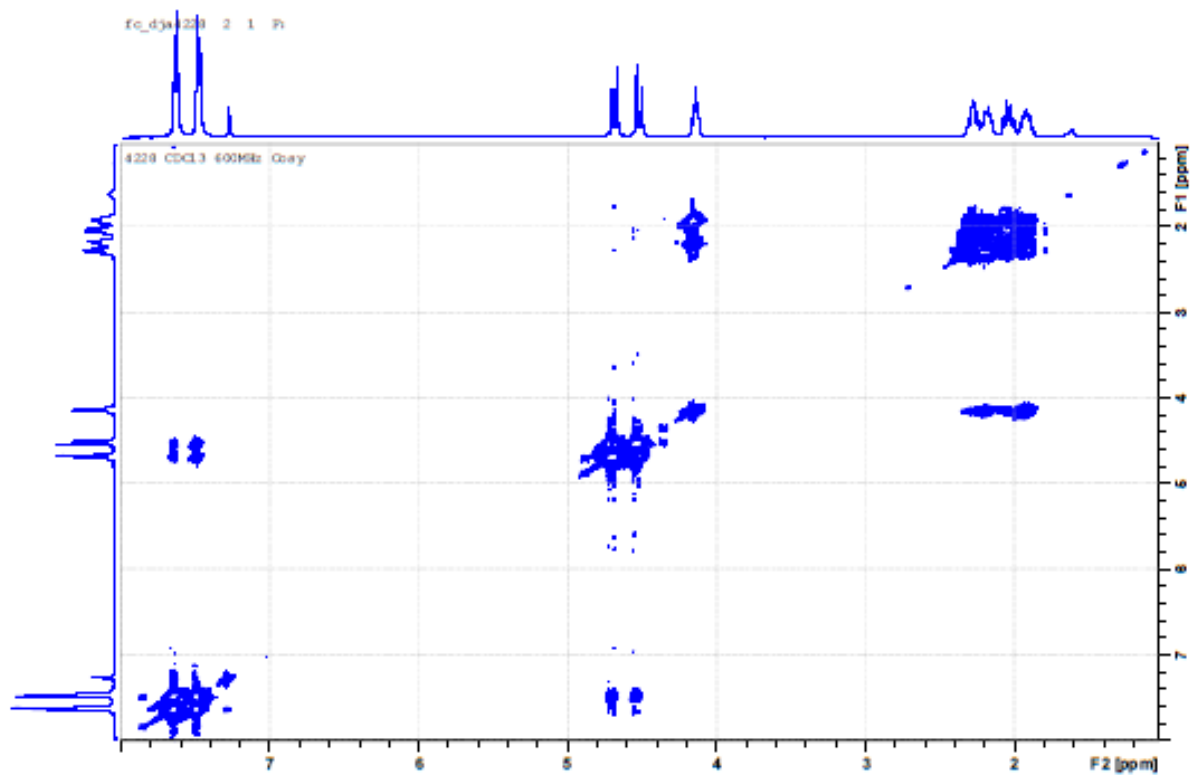

## HMBC of compound 4n

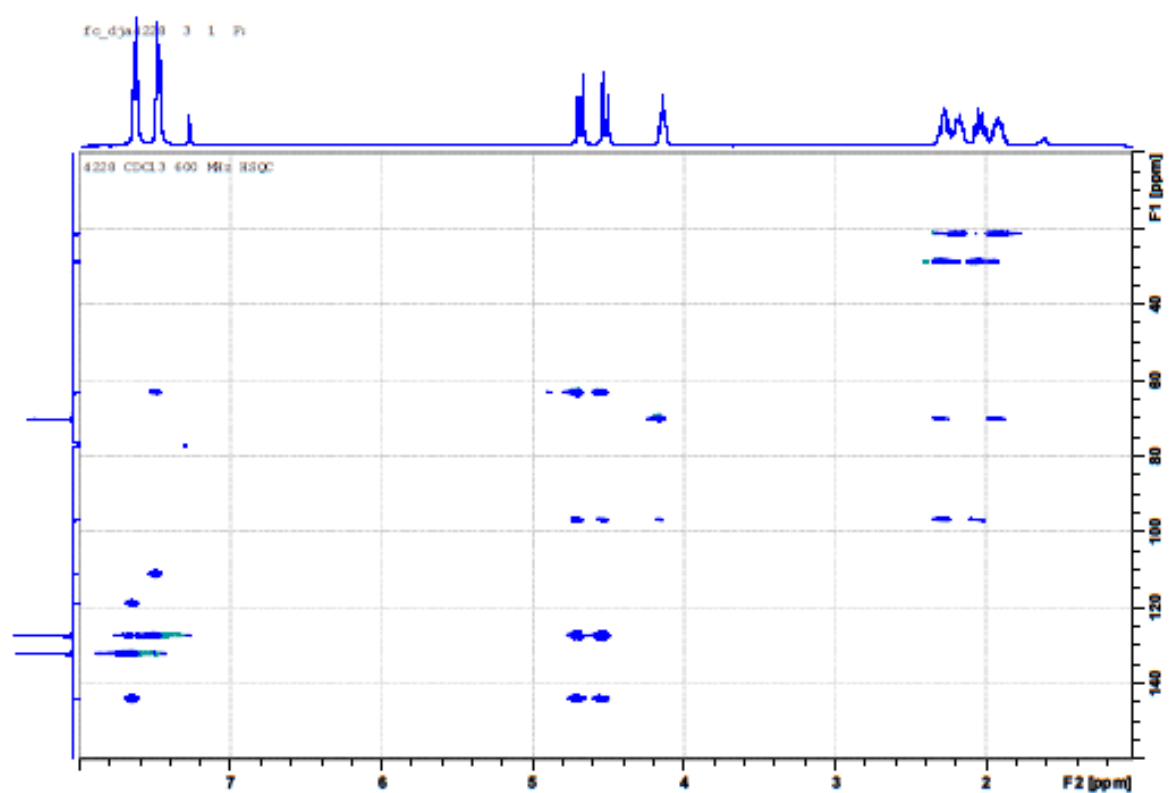

## HSQC of compound 4n

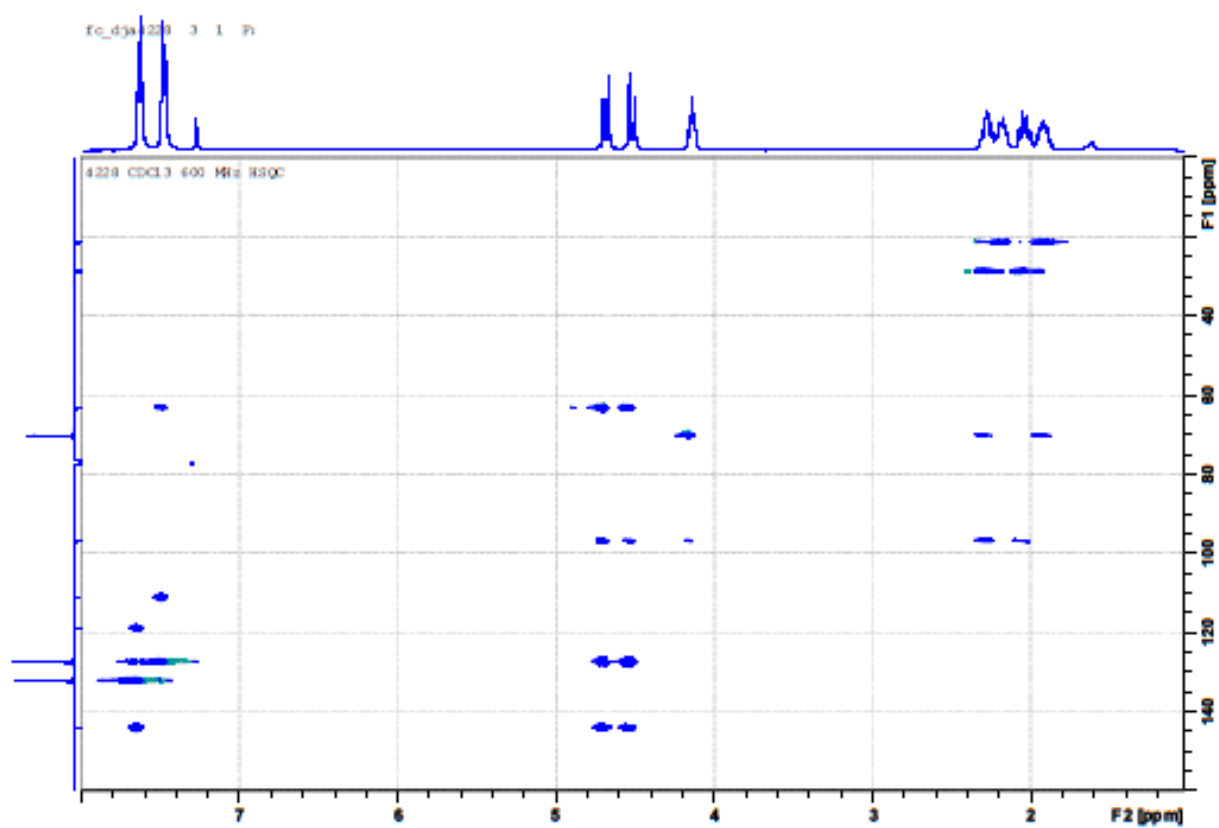



## IR spectra of compound 4n

Analyste  
Date

Analyst  
jeudi 17 novembre 2016 10:27

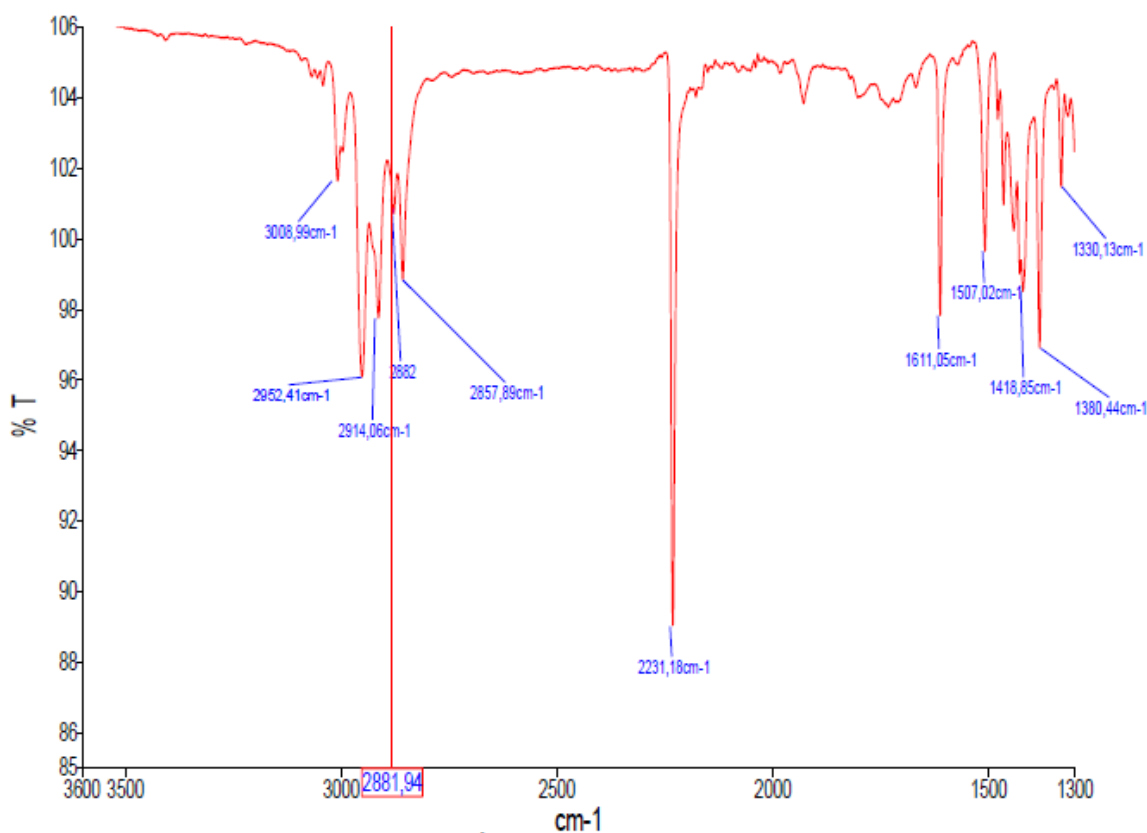

## Mass spectra (HRMS) of compound 4n

### Mass Spectrum SmartFormula Report

#### Analysis Info

Analysis Name D:\Data\2016\cp3a\charnay\Fc\_dja4228\_RB6\_01\_4572.d  
Method ms\_fia\_tw\_50\_1200\_pos.m  
Sample Name Fc\_dja4228  
Comment

Acquisition Date 11/17/2016 3:41:22 PM

Operator BDAL@DE

Instrument / Ser# micrOTOF-Q II 8228888.1  
0027

#### Acquisition Parameter

|             |            |                       |          |                  |           |
|-------------|------------|-----------------------|----------|------------------|-----------|
| Source Type | ESI        | Ion Polarity          | Positive | Set Nebulizer    | 2.8 Bar   |
| Focus       | Not active | Set Capillary         | 4500 V   | Set Dry Heater   | 180 °C    |
| Scan Begin  | 50 m/z     | Set End Plate Offset  | -500 V   | Set Dry Gas      | 9.0 l/min |
| Scan End    | 1200 m/z   | Set Collision Cell RF | 50.0 Vpp | Set Divert Valve | Waste     |

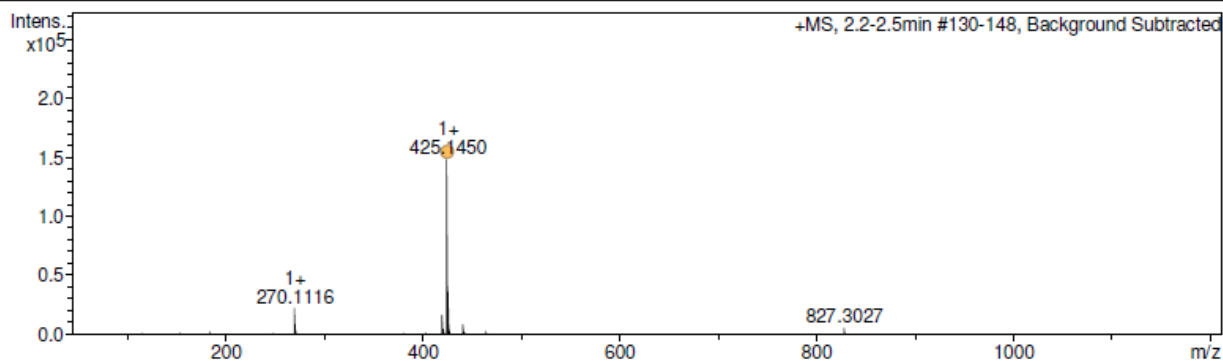

| Meas. m/z  | # | Ion Formula  | m/z        | err [mDa] | err [ppm] | mSigma |
|------------|---|--------------|------------|-----------|-----------|--------|
| 425.144957 | 1 | C24H22N2NaO4 | 425.147178 | -2.2      | -5.2      | 3.5    |

## X-Ray Structure of compound 4n

### checkCIF/PLATON report

Structure factors have been supplied for datablock(s) 2456GuillotICMMO

THIS REPORT IS FOR GUIDANCE ONLY. IF USED AS PART OF A REVIEW PROCEDURE FOR PUBLICATION, IT SHOULD NOT REPLACE THE EXPERTISE OF AN EXPERIENCED CRYSTALLOGRAPHIC REFEREE.

No syntax errors found.      CIF dictionary      Interpreting this report

### Datablock: 2456GuillotICMMO

---

|                 |                |                    |              |
|-----------------|----------------|--------------------|--------------|
| Bond precision: | C-C = 0.0030 A | Wavelength=0.71073 |              |
| Cell:           | a=19.2545(11)  | b=15.5146(10)      | c=13.4314(9) |
|                 | alpha=90       | beta=90            | gamma=90     |
| Temperature:    | 100 K          |                    |              |
|                 | Calculated     | Reported           |              |
| Volume          | 4012.3(4)      | 4012.3(4)          |              |
| Space group     | P b c n        | P b c n            |              |
| Hall group      | -P 2n 2ab      | -P 2n 2ab          |              |
| Moiety formula  | C24 H22 N2 O4  | C24 H22 N2 O4      |              |
| Sum formula     | C24 H22 N2 O4  | C24 H22 N2 O4      |              |
| Mr              | 402.44         | 402.43             |              |
| Dx, g cm-3      | 1.332          | 1.332              |              |
| Z               | 8              | 8                  |              |
| Mu (mm-1)       | 0.092          | 0.092              |              |
| F000            | 1696.0         | 1696.0             |              |
| F000'           | 1696.80        |                    |              |
| h,k,lmax        | 27,22,19       | 27,22,18           |              |
| Nref            | 6168           | 6103               |              |
| Tmin,Tmax       | 0.974,0.990    | 0.959,0.995        |              |
| Tmin'           | 0.971          |                    |              |

Correction method= # Reported T Limits: Tmin=0.959 Tmax=0.995  
AbsCorr = MULTI-SCAN

Data completeness= 0.989      Theta(max)= 30.560

R(reflections)= 0.0580( 3368)      wR2(reflections)= 0.1918( 6103)

S = 1.019      Npar= 271

---

The following ALERTS were generated. Each ALERT has the format  
**test-name\_ALERT\_alert-type\_alert-level.**  
Click on the hyperlinks for more details of the test.

Datablock: 2456GuilloP b c n - ellipsoid plot

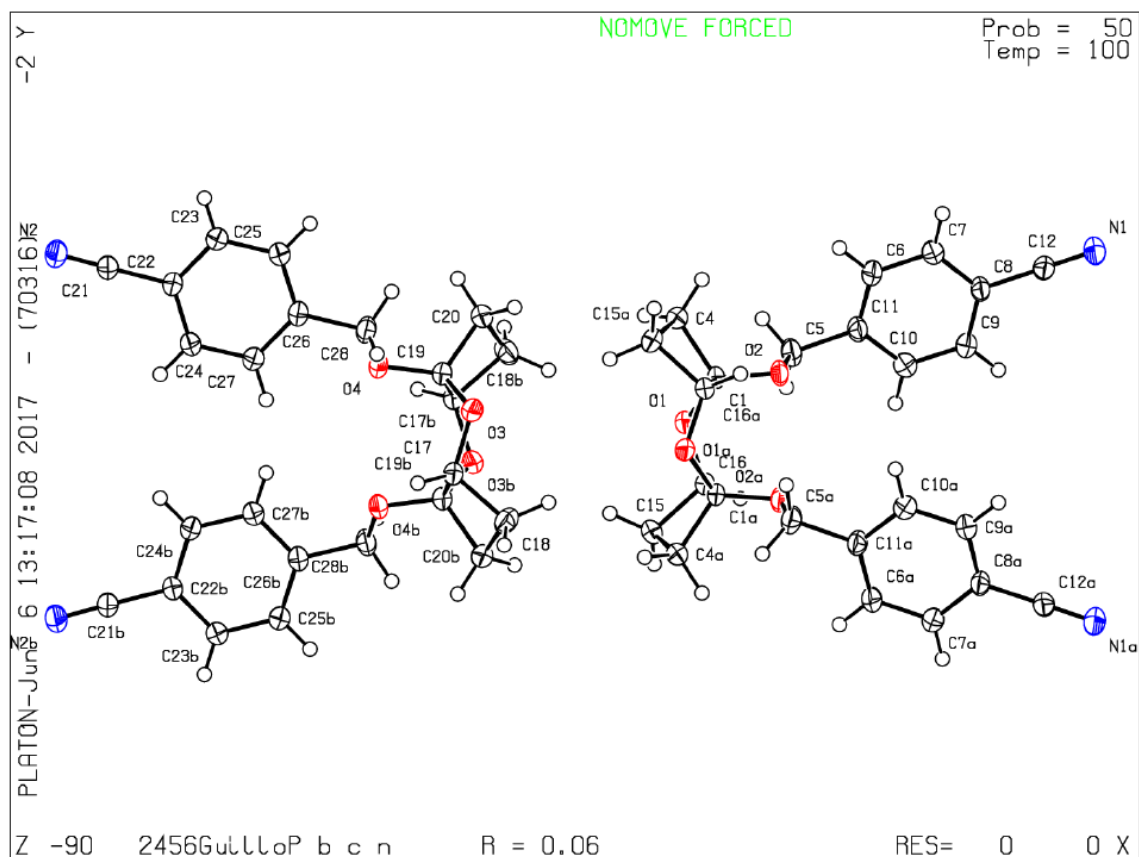

2456GuilloP b c n R = 0.06 : Jun 06 14:13:36 2017

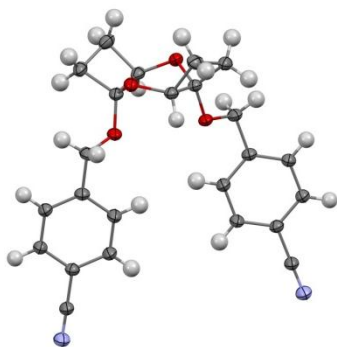

**Fig. 2.** ORTEP diagram of compound **cis-4n**, showing 30% probability ellipsoids. Only one molecule of the asymmetric unit is shown. X-ray diffraction data for the two compound **cis-4n** were collected by using a X8 APEXII CCD Bruker diffractometer with graphite-monochromated MoK $\alpha$  radiation. X-ray diffraction Crystals were mounted on a CryoLoop (Hampton Research) with Paratone-N (Hampton Research) as cryoprotectant and then flashfrozen in a nitrogen-gas stream at 100 K. For compounds, the temperature of the crystal was maintained at the selected value (100K)

by means of a 700 series Cryostream cooling device to within an accuracy of  $\pm 1$  K. The data were corrected for Lorentz polarization, and absorption effects. The structures were solved by direct methods using SHELXS-97<sup>10</sup> and refined against  $F^2$  by full-matrix least-squares techniques using SHELXL-2014<sup>1</sup> with anisotropic displacement parameters for all non-hydrogen atoms. Hydrogen atoms were located on a difference Fourier map and introduced into the calculations as a riding model with isotropic thermal parameters. All calculations were performed by using the Crystal Structure crystallographic software package WINGX.<sup>11</sup> The crystal data collection and refinement parameters are given in Table S2 CCDC 1557855 contains the supplementary crystallographic data for this paper. These data can be obtained free of charge from the Cambridge Crystallographic Data Centre via <http://www.ccdc.cam.ac.uk/Community/Requestastructure>.

---

10) G. M. Sheldrick, *Acta Crystallogr., Sect. A: Found. Crystallogr.*, **2008**, 64, 112-122

11) Farrugia, L. J. *J. Appl. Cryst.*, **1999**, 32, 837.

**Table S2** Crystallographic data and structure refinement details for **cis-4n**.

| Compounds                                            | <b>cis-4n</b>                                                 |
|------------------------------------------------------|---------------------------------------------------------------|
| Empirical Formula                                    | C <sub>24</sub> H <sub>22</sub> N <sub>2</sub> O <sub>4</sub> |
| $M_r$                                                | 402.43                                                        |
| Crystal size, mm <sup>3</sup>                        | 0.32 x 0.24 x 0.11                                            |
| Crystal system                                       | orthorhombic                                                  |
| Space group                                          | <i>P b c n</i>                                                |
| a, Å                                                 | 19.2545(11)                                                   |
| b, Å                                                 | 15.5146(10)                                                   |
| c, Å                                                 | 13.4314(9)                                                    |
| $\alpha$ , °                                         | 90                                                            |
| $\beta$ , °                                          | 90                                                            |
| $\gamma$ , °                                         | 90                                                            |
| Cell volume, Å <sup>3</sup>                          | 4012.3(4)                                                     |
| Z ; Z'                                               | 8 ; 1                                                         |
| T, K                                                 | 100(1)                                                        |
| Radiation type ; wavelength Å                        | MoK $\alpha$ ; 0.71073                                        |
| F <sub>000</sub>                                     | 1696                                                          |
| $\mu$ , mm <sup>-1</sup>                             | 0.092                                                         |
| $\theta$ range, °                                    | 1.686 - 30.560                                                |
| Reflection collected                                 | 41 326                                                        |
| Reflections unique                                   | 6 103                                                         |
| R <sub>int</sub>                                     | 0.0742                                                        |
| GOF                                                  | 1.019                                                         |
| Refl. obs. ( $I > 2\sigma(I)$ )                      | 3 368                                                         |
| Parameters                                           | 391                                                           |
| wR <sub>2</sub> (all data)                           | 0.1918                                                        |
| R value ( $I > 2\sigma(I)$ )                         | 0.0580                                                        |
| Largest diff. peak and hole (e-<br>Å <sup>-3</sup> ) | 0.529 ; -0.275                                                |
